# Supplementary material for: Tandem phospha-Michael addition/cyclization/dehydration of 2-hydroxychalcones with H-phosphine oxides for the synthesis of 4-phosphorylated 4H-chromenes
Source: Royal Society of Chemistry journal article supplement (doi:10.1039/d3ob01562a), 2023-01-01

# Tandem *Phospha*-Michael Addition/Cyclization/Dehydration of 2-Hydroxychalcones with *H*-Phosphine Oxides for Synthesis of 4-Phosphorylated 4*H*-Chromenes

Zhong Wen,<sup>a</sup> Kai-Cheng Yang,<sup>a</sup> Shi-Lu Zheng,<sup>a</sup> Yu-Shan Zhang,<sup>a</sup> Sheng-Jun Wang,<sup>a</sup> Hai-Liang Ni<sup>b</sup> and Long Chen<sup>\*a</sup>

<sup>a</sup> Antibiotics Research and Re-evaluation Key Laboratory of Sichuan Province, Sichuan Industrial Institute of Antibiotics, School of Pharmacy, Chengdu University, 2025 Chengluo Avenue, Chengdu 610016, P. R. China

E-mail: [chenlong@cdu.edu.cn](mailto:chenlong@cdu.edu.cn)

<sup>b</sup> College of Chemistry and Materials Science, Sichuan Normal University, 5 Jing An Road, Chengdu 610066, P. R. China

| <b>Table of Contents</b>                                                                                                                   | <b>Page</b>   |
|--------------------------------------------------------------------------------------------------------------------------------------------|---------------|
| <b>1. General information</b>                                                                                                              | <b>2</b>      |
| <b>2. Condition optimization</b>                                                                                                           | <b>3-4</b>    |
| <b>3. General procedure for the tandem <i>phospha</i>-Michael addition/cyclization/dehydration to 4-phosphorylated 4<i>H</i>-chromenes</b> | <b>5-17</b>   |
| <b>4. Scaled synthesis and product elaboration</b>                                                                                         | <b>18-19</b>  |
| <b>5. Mechanism investigation</b>                                                                                                          | <b>19</b>     |
| <b>6. <sup>1</sup>H, <sup>13</sup>C, <sup>19</sup>F and <sup>31</sup>P NMR spectra</b>                                                     | <b>20-120</b> |

## 1. General information:

Reactions were monitored by thin layer chromatography using UV light to visualize the reaction course. Purification of reaction products were carried out by flash chromatography on silica gel H. Chemical yields refer to pure isolated substances.  $^1\text{H}$  and  $^{13}\text{C}$  NMR spectra were obtained using a Bruker DPX-600 or DPX-400 spectrometer. The  $^{19}\text{F}$  NMR spectra was recorded at JEOL 565 MHz. HRMS data were collected on a on a Thermo Scientific LTQ Orbitrap Discovery (Bremen, Germany). The linear ion trap (LTQ) part of the hybrid MS system was equipped with electrospray ionization (ESI) probe and operated in both positive and negative ion modes. Chemical shifts are reported in ppm from tetramethylsilane with the solvent resonance as the internal standard. The following abbreviations were used to designate chemical shift multiplicities: s = singlet, d = doublet, t = triplet, q = quartet, h = heptet, m = multiplet, br = broad.

All reactions were run under an atmosphere of air. Anhydrous THF, toluene and 1,4-dioxane were prepared by distillation over sodium-benzophenone ketyl prior to use. Anhydrous acetone was distilled over anhydrous  $\text{CaSO}_4$  and stored over MS 4Å. Anhydrous halogenated solvents and  $\text{CH}_3\text{CN}$  were prepared by first distillation over  $\text{P}_2\text{O}_5$  and then from  $\text{CaH}_2$ . Anhydrous ethyl acetate was prepared by first dried in anhydrous  $\text{Na}_2\text{SO}_4$  and then distilled over  $\text{P}_2\text{O}_5$  and stored over MS 4Å. Anhydrous  $\text{CH}_3\text{NO}_2$  was prepared by first dried in anhydrous  $\text{Na}_2\text{SO}_4$  and then distilled under reduced pressure. 2-Hydroxychalcones **1** were prepared according to the literature report.<sup>1</sup>  $\text{Hg}(\text{OTf})_2$  (99.998%) was purchased from Alfa-Aesar and used as received.

---

<sup>1</sup> P. Saha, A. Biswas, N. Molleti and V. K. Singh, *J. Org. Chem.*, 2015, **80**, 11115.

## 2. Condition optimization

### 2.1 Catalyst and Solvent screening

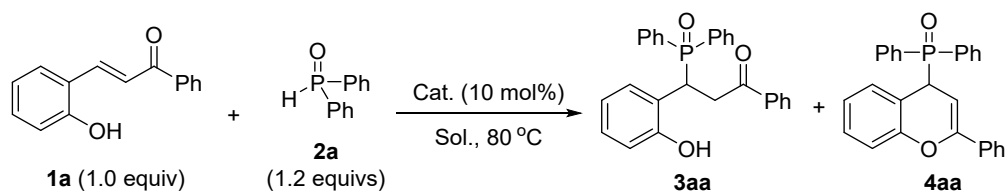

| Entry <sup>a</sup> | Cat.                                                  | Time/h | Solvent                              | Yield/% <sup>b</sup> |            |
|--------------------|-------------------------------------------------------|--------|--------------------------------------|----------------------|------------|
|                    |                                                       |        |                                      | <b>3aa</b>           | <b>4aa</b> |
| 1                  | HOTf                                                  | 5      | ClCH <sub>2</sub> CH <sub>2</sub> Cl | 47                   | 40         |
| 2                  | <i>p</i> -TsOH·H <sub>2</sub> O                       | 5      | ClCH <sub>2</sub> CH <sub>2</sub> Cl | 40                   | 51         |
| 3                  | HClO <sub>4</sub> (70 wt%, aq.)                       | 3.5    | ClCH <sub>2</sub> CH <sub>2</sub> Cl | 52                   | 34         |
| 4                  | Hg(ClO <sub>4</sub> ) <sub>2</sub> ·3H <sub>2</sub> O | 11     | ClCH <sub>2</sub> CH <sub>2</sub> Cl | 53                   | 39         |
| 5                  | Zn(ClO <sub>4</sub> ) <sub>2</sub> ·6H <sub>2</sub> O | 11     | ClCH <sub>2</sub> CH <sub>2</sub> Cl | 52                   | 43         |
| 6 <sup>c</sup>     | Cu(ClO <sub>4</sub> ) <sub>2</sub> ·6H <sub>2</sub> O | 2      | ClCH <sub>2</sub> CH <sub>2</sub> Cl | 20                   | 21         |
| 7                  | Mg(ClO <sub>4</sub> ) <sub>2</sub> ·6H <sub>2</sub> O | 15     | ClCH <sub>2</sub> CH <sub>2</sub> Cl | 70                   | 23         |
| 8                  | Mn(ClO <sub>4</sub> ) <sub>2</sub> ·6H <sub>2</sub> O | 5      | ClCH <sub>2</sub> CH <sub>2</sub> Cl | 20                   | 43         |
| 9                  | Ga(OTf) <sub>3</sub>                                  | 5.5    | ClCH <sub>2</sub> CH <sub>2</sub> Cl | 57                   | 34         |
| 10                 | Y(OTf) <sub>3</sub>                                   | 4.5    | ClCH <sub>2</sub> CH <sub>2</sub> Cl | 57                   | 39         |
| 11                 | Bi(OTf) <sub>3</sub>                                  | 9      | ClCH <sub>2</sub> CH <sub>2</sub> Cl | 54                   | 29         |
| 12                 | Sc(OTf) <sub>3</sub>                                  | 7      | ClCH <sub>2</sub> CH <sub>2</sub> Cl | 55                   | 22         |
| 13                 | Sm(OTf) <sub>3</sub>                                  | 4      | ClCH <sub>2</sub> CH <sub>2</sub> Cl | 60                   | 33         |
| 14                 | La(OTf) <sub>3</sub>                                  | 5      | ClCH <sub>2</sub> CH <sub>2</sub> Cl | 59                   | 35         |
| 15                 | In(OTf) <sub>3</sub>                                  | 7      | ClCH <sub>2</sub> CH <sub>2</sub> Cl | 55                   | 27         |
| 16                 | Ni(OTf) <sub>2</sub>                                  | 23     | ClCH <sub>2</sub> CH <sub>2</sub> Cl | 49                   | 31         |
| 17                 | Hg(OTf) <sub>2</sub>                                  | 3.5    | ClCH <sub>2</sub> CH <sub>2</sub> Cl | 62                   | 38         |
| 18                 | Mg(OTf) <sub>2</sub>                                  | 6.5    | ClCH <sub>2</sub> CH <sub>2</sub> Cl | 47                   | 37         |
| 19                 | Zn(OTf) <sub>2</sub>                                  | 10     | ClCH <sub>2</sub> CH <sub>2</sub> Cl | 46                   | 41         |
| 20                 | Ca(OTf) <sub>2</sub>                                  | 12     | ClCH <sub>2</sub> CH <sub>2</sub> Cl | 45                   | 41         |
| 21                 | Cu(OTf) <sub>2</sub>                                  | 9      | ClCH <sub>2</sub> CH <sub>2</sub> Cl | 23                   | 10         |
| 22 <sup>c</sup>    | CuOTf·toluene                                         | 2.5    | ClCH <sub>2</sub> CH <sub>2</sub> Cl | 11                   | 8          |
| 23                 | AgOTf                                                 | 20     | ClCH <sub>2</sub> CH <sub>2</sub> Cl | 14                   | 23         |
| 24 <sup>d</sup>    | Hg(OTf) <sub>2</sub>                                  | 3.5+24 | ClCH <sub>2</sub> CH <sub>2</sub> Cl | 60                   | 37         |
| 25 <sup>d</sup>    | Hg(OTf) <sub>2</sub>                                  | 2+24   | Toluene                              | 83                   | 6          |
| 26 <sup>d</sup>    | Hg(OTf) <sub>2</sub>                                  | 8+24   | CH <sub>3</sub> CN                   | 49                   | 36         |
| 27 <sup>c</sup>    | Hg(OTf) <sub>2</sub>                                  | 24     | CH <sub>3</sub> NO <sub>2</sub>      | 77                   | 17         |
| 28 <sup>d</sup>    | Hg(OTf) <sub>2</sub>                                  | 10+24  | CH <sub>3</sub> CO <sub>2</sub> Et   | 9                    | 78         |

|                 |                            |             |                                                 |           |           |
|-----------------|----------------------------|-------------|-------------------------------------------------|-----------|-----------|
| 29              | Hg(OTf) <sub>2</sub>       | 10          | CH <sub>3</sub> CO <sub>2</sub> Et              | 14        | 72        |
| 30 <sup>f</sup> | Hg(OTf) <sub>2</sub>       | 10+24       | CH <sub>3</sub> CO <sub>2</sub> Et              | 21        | 49        |
| <b>31</b>       | <b>Hg(OTf)<sub>2</sub></b> | <b>6+24</b> | <b>CH<sub>3</sub>CO<sub>2</sub>Me</b>           | <b>12</b> | <b>85</b> |
| 32              | Hg(OTf) <sub>2</sub>       | 2+24        | CH <sub>3</sub> CO <sub>2</sub> <sup>n</sup> Pr | 13        | 65        |
| 33              | Hg(OTf) <sub>2</sub>       | 2+24        | CH <sub>3</sub> CO <sub>2</sub> <sup>n</sup> Bu | 10        | 75        |

<sup>a</sup> 0.1 mmol scale; <sup>b</sup> NMR yield based on the disappearance of **1a**; <sup>c</sup> **2a** was consumed totally in 2.5 h; <sup>d</sup> Reaction was run for further 24 h after the disappearance of **1a**; <sup>e</sup> **1a** could not be consumed totally; <sup>f</sup> Temperature was increased to 100 °C after the disappearance of **1a** (10 h).

## 2.2 The addition of base after the disappearance of **1a**

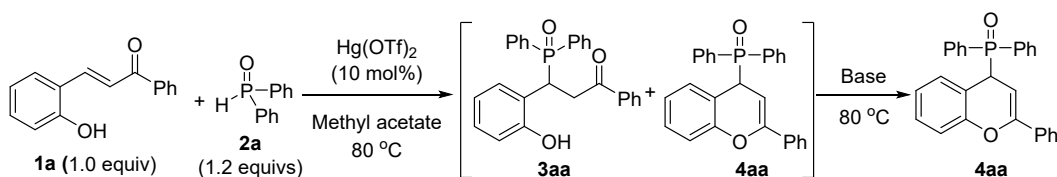

| Entry <sup>a</sup> | Base<br>(1.0 equiv)            | Time/h <sup>c</sup> | Yield/% <sup>b</sup> |            |
|--------------------|--------------------------------|---------------------|----------------------|------------|
|                    |                                |                     | <b>3aa</b>           | <b>4aa</b> |
| 1                  | NEt <sub>3</sub>               |                     | 12                   | 73         |
| 2                  | DMAP                           |                     | 22                   | 43         |
| 3                  | DBU                            | 6+24                | 23                   | 66         |
| 4                  | DABCO                          |                     | 21                   | 76         |
| 5                  | K <sub>2</sub> CO <sub>3</sub> |                     | 24                   | 74         |
| 6                  | None                           |                     | 12                   | 85         |

<sup>a</sup> 0.1 mmol scale; <sup>b</sup> NMR yield; <sup>c</sup> Reaction was run for further 24 h after the disappearance of **1a**.

## 2.3 The addition of other additives after the disappearance of **1a**

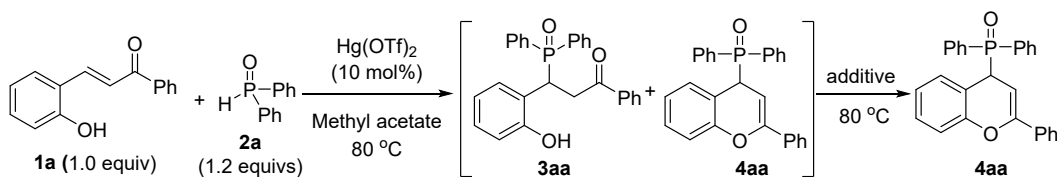

| Entry <sup>a</sup> | Additive<br>(1.0 equiv)          | Time/h <sup>c</sup> | Yield/% <sup>b</sup> |            |
|--------------------|----------------------------------|---------------------|----------------------|------------|
|                    |                                  |                     | <b>3aa</b>           | <b>4aa</b> |
| 1                  | KPF <sub>6</sub>                 |                     | 9                    | 79         |
| 2                  | NaPF <sub>6</sub>                |                     | 10                   | 77         |
| 3                  | NaBF <sub>4</sub>                | 6+24                | 13                   | 77         |
| 4                  | NH <sub>4</sub> PF <sub>6</sub>  |                     | 10                   | 79         |
| 5                  | Bu <sub>4</sub> NPF <sub>6</sub> |                     | 10                   | 76         |
| 6                  | None                             |                     | 12                   | 85         |

<sup>a</sup> 0.1 mmol scale; <sup>b</sup> NMR yield; <sup>c</sup> Reaction was run for further 24 h after the disappearance of **1a**.

### 3. General procedure for the tandem *phospha*-Michael addition/cyclization/dehydration to 4-phosphorylated 4*H*-chromenes

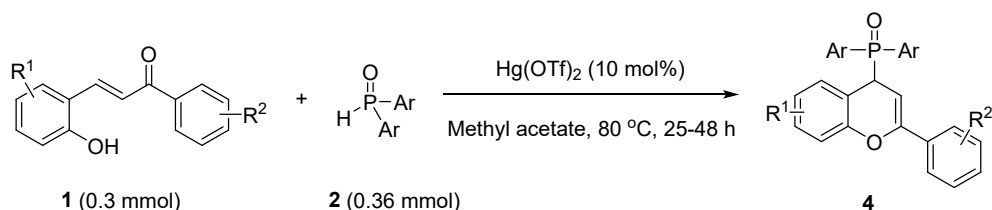

The reaction was carried out under an air atmosphere. To a 35-mL sealed tube were added 2-hydroxychalcones **1** (0.3 mmol, 1.0 equiv),  $\text{Ar}_2\text{P(O)H}$  **2** (0.36 mmol, 1.2 equivs) and 6.0 mL of anhydrous methyl acetate. After adding  $\text{Hg(OTf)}_2$  (15.0 mg, 10 mol%), the reaction mixture was stirred at 80 °C till almost full conversion of **1** by TLC analysis and then further stirred for 24 hrs. The reaction mixture was cooled to room temperature and then directly subjected to column chromatography using dichloromethane/ethyl acetate (generally 40:1 to 5:1, v:v) as the eluent to afford the desired products **4**.

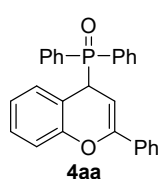

Column chromatography afforded the desired product **4aa** in 76% yield (93 mg) as yellow solid; Mp: 181-183 °C;  $^1\text{H NMR}$  (600 MHz,  $\text{CDCl}_3$ ):  $\delta$  = 7.73-7.69 (m, 4H), 7.56-7.54 (m, 1H), 7.49-7.45 (m, 5H), 7.36-7.32 (m, 5H), 7.16-7.11 (m, 2H), 6.93 (t,  $J$  = 7.8 Hz, 1H), 6.86 (d,  $J$  = 8.4 Hz, 1H), 5.39 (dd,  $J$  = 5.4 Hz, 3.6 Hz, 1H), 4.66 (dd,  $J$  = 21.0 Hz, 5.4 Hz, 1H);  $^{13}\text{C}\{^1\text{H}\}$  NMR (150 MHz,  $\text{CDCl}_3$ ):  $\delta$  = 152.0 (d,  $J_{\text{C-P}}$  = 4.5 Hz), 151.1 (d,  $J_{\text{C-P}}$  = 9.0 Hz), 133.6 (d,  $J_{\text{C-P}}$  = 3.0 Hz), 132.09 (d,  $J_{\text{C-P}}$  = 3.0 Hz), 132.06 (d,  $J_{\text{C-P}}$  = 1.5 Hz), 132.02, 131.98 (d,  $J_{\text{C-P}}$  = 4.5 Hz), 130.3 (d,  $J_{\text{C-P}}$  = 94.5 Hz), 129.8 (d,  $J_{\text{C-P}}$  = 94.5 Hz), 129.6 (d,  $J_{\text{C-P}}$  = 3.0 Hz), 128.9, 128.6 (d,  $J_{\text{C-P}}$  = 3.0 Hz), 128.5 ( $J_{\text{C-P}}$  = 12.0 Hz), 128.3, 128.2 (d,  $J_{\text{C-P}}$  = 12.0 Hz), 124.8, 123.6 (d,  $J_{\text{C-P}}$  = 1.5 Hz), 116.5 (d,  $J_{\text{C-P}}$  = 1.5 Hz), 116.0 (d,  $J_{\text{C-P}}$  = 3.0 Hz), 92.8 (d,  $J_{\text{C-P}}$  = 6.0 Hz), 40.6 (d,  $J_{\text{C-P}}$  = 67.5 Hz);  $^{31}\text{P}\{^1\text{H}\}$  NMR (243 MHz,  $\text{CDCl}_3$ ):  $\delta$  = 30.6; HRMS (ESI): Exact mass calcd for  $\text{C}_{27}\text{H}_{21}\text{O}_2\text{P}$  [ $\text{M}+\text{H}$ ] $^+$ : 409.1352, Found: 409.1340.

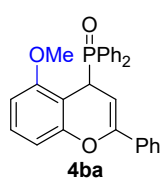

Column chromatography afforded the desired product **4ba** in 54% yield (72 mg) as yellow oil;  $^1\text{H NMR}$  (600 MHz,  $\text{CDCl}_3$ ):  $\delta$  = 7.81-7.78 (m, 2H), 7.67-7.64 (m, 2H), 7.51-7.49 (m, 1H), 7.44-7.41 (m, 5H), 7.35-7.32 (m, 2H), 7.285-7.275 (m, 3H), 7.18-7.15 (m, 1H), 6.69 (d,  $J$  = 8.4 Hz, 1H), 6.37 (d,  $J$  = 7.8 Hz, 1H), 5.50 (dd,  $J$  = 5.4 Hz, 3.0 Hz, 1H), 4.90 (dd,  $J$  = 15.6 Hz, 6.0 Hz, 1H), 3.16 (s, 3H);  $^{13}\text{C}\{^1\text{H}\}$  NMR (150 MHz,  $\text{CDCl}_3$ ):  $\delta$  = 156.5 (d,  $J_{\text{C-P}}$  = 3.0 Hz), 154.0 (d,  $J_{\text{C-P}}$  = 4.5 Hz), 152.0 (d,  $J_{\text{C-P}}$  = 9.0 Hz), 133.6 (d,  $J_{\text{C-P}}$  = 4.5 Hz), 132.0 (d,  $J_{\text{C-P}}$  = 91.5 Hz), 131.8 (d,  $J_{\text{C-P}}$

= 1.5 Hz), 131.7, 131.45 (d,  $J_{C-P}$  = 6.0 Hz), 131.44 (d,  $J_{C-P}$  = 91.5 Hz), 131.4, 128.71, 128.67 (d,  $J_{C-P}$  = 3.0 Hz), 128.1, 128.0 (d,  $J_{C-P}$  = 12.0 Hz), 127.8 (d,  $J_{C-P}$  = 10.5 Hz), 125.0 (d,  $J_{C-P}$  = 1.5 Hz), 109.3 (d,  $J_{C-P}$  = 1.5 Hz), 106.0 (d,  $J_{C-P}$  = 4.5 Hz), 104.9 (d,  $J_{C-P}$  = 1.5 Hz), 93.6 (d,  $J_{C-P}$  = 7.5 Hz), 54.6, 36.7 (d,  $J_{C-P}$  = 67.5 Hz);  $^{31}\text{P}\{^1\text{H}\}$  NMR (243 MHz,  $\text{CDCl}_3$ ):  $\delta$  = 29.2; HRMS (ESI): Exact mass calcd for  $\text{C}_{28}\text{H}_{23}\text{O}_3\text{P}$   $[\text{M}+\text{H}]^+$ : 439.1458, Found: 439.1446.

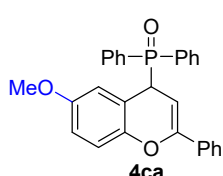

Column chromatography afforded the desired product **4ca** in 67% yield (88 mg) as brown solid; Mp: 134-136 °C;  $^1\text{H}$  NMR (600 MHz,  $\text{CDCl}_3$ ):  $\delta$  = 7.76-7.69 (m, 4H), 7.56-7.54 (m, 1H), 7.51-7.49 (m, 1H), 7.48-7.44 (m, 4H), 7.40-7.37 (m, 2H), 7.34-7.31 (m, 3H), 6.82 (d,  $J$  = 9.0 Hz, 1H), 6.72-6.70 (m, 1H), 6.53-6.52 (m, 1H), 5.37 (dd,  $J$  =

5.4 Hz, 3.0 Hz, 1H), 4.64 (dd,  $J$  = 20.4 Hz, 5.4 Hz, 1H), 3.56 (s, 3H);  $^{13}\text{C}\{^1\text{H}\}$  NMR (150 MHz,  $\text{CDCl}_3$ ):  $\delta$  = 155.3 (d,  $J_{C-P}$  = 3.0 Hz), 151.3 (d,  $J_{C-P}$  = 9.0 Hz), 146.1 (d,  $J_{C-P}$  = 4.5 Hz), 133.7 (d,  $J_{C-P}$  = 3.0 Hz), 132.1 (d,  $J_{C-P}$  = 4.5 Hz), 132.0 (d,  $J_{C-P}$  = 9.0 Hz), 130.3 (d,  $J_{C-P}$  = 93.0 Hz), 130.1 (d,  $J_{C-P}$  = 93.0 Hz), 128.8, 128.5 (d,  $J_{C-P}$  = 10.5 Hz), 128.30 (d,  $J_{C-P}$  = 10.5 Hz), 128.28, 124.8 (d,  $J_{C-P}$  = 1.5 Hz), 117.4 (d,  $J_{C-P}$  = 3.0 Hz), 116.4 (d,  $J_{C-P}$  = 4.5 Hz), 115.6 (d,  $J_{C-P}$  = 3.0 Hz), 112.8 (d,  $J_{C-P}$  = 3.0 Hz), 91.7 (d,  $J_{C-P}$  = 7.5 Hz), 55.5, 41.1 (d,  $J_{C-P}$  = 67.5 Hz);  $^{31}\text{P}\{^1\text{H}\}$  NMR (243 MHz,  $\text{CDCl}_3$ ):  $\delta$  = 30.5; HRMS (ESI): Exact mass calcd for  $\text{C}_{28}\text{H}_{23}\text{O}_3\text{P}$   $[\text{M}+\text{H}]^+$ : 439.1458, Found: 439.1450.

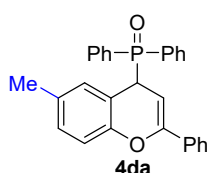

Column chromatography afforded the desired product **4da** in 52% yield (66 mg) as brown solid; Mp: 95-97 °C;  $^1\text{H}$  NMR (600 MHz,  $\text{CDCl}_3$ ):  $\delta$  = 7.73-7.70 (m, 4H), 7.56-7.54 (m, 1H), 7.51-7.45 (m, 5H), 7.38-7.37 (m, 2H), 7.33-7.31 (m, 3H), 6.96-6.94 (m, 1H), 6.79-6.78 (m, 2H), 5.38-5.37 (m, 1H), 4.59 (dd,  $J$  = 20.4 Hz, 4.8 Hz, 1H), 2.16 (s,

3H);  $^{13}\text{C}\{^1\text{H}\}$  NMR (150 MHz,  $\text{CDCl}_3$ ):  $\delta$  = 151.2 (d,  $J_{C-P}$  = 9.0 Hz), 150.0 (d,  $J_{C-P}$  = 3.0 Hz), 133.7 (d,  $J_{C-P}$  = 3.0 Hz), 132.9 (d,  $J_{C-P}$  = 1.5 Hz), 132.1 (d,  $J_{C-P}$  = 7.5 Hz), 132.0 (d,  $J_{C-P}$  = 9.0 Hz), 131.9 (d,  $J_{C-P}$  = 3.0 Hz), 130.5 (d,  $J_{C-P}$  = 94.5 Hz), 130.1 (d,  $J_{C-P}$  = 94.5 Hz), 130.0 (d,  $J_{C-P}$  = 3.0 Hz), 129.2 (d,  $J_{C-P}$  = 3.0 Hz), 128.8, 128.4 (d,  $J_{C-P}$  = 10.5 Hz), 128.3, 128.1 (d,  $J_{C-P}$  = 10.5 Hz), 124.8, 116.2 (d,  $J_{C-P}$  = 3.0 Hz), 115.6 (d,  $J_{C-P}$  = 4.5 Hz), 92.6 (d,  $J_{C-P}$  = 6.0 Hz), 40.9 (d,  $J_{C-P}$  = 67.5 Hz), 20.6;  $^{31}\text{P}\{^1\text{H}\}$  NMR (243 MHz,  $\text{CDCl}_3$ ):  $\delta$  = 30.3; HRMS (ESI): Exact mass calcd for  $\text{C}_{28}\text{H}_{23}\text{O}_2\text{P}$   $[\text{M}+\text{H}]^+$ : 423.1508, Found: 423.1501.

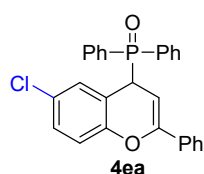

Column chromatography afforded the desired product **4ea** in 66% yield (78 mg) as green

solid; Mp: 180-182 °C;  $^1\text{H}$  NMR (600 MHz,  $\text{CDCl}_3$ ):  $\delta$  = 7.74-7.71 (m, 4H), 7.59-7.56 (m, 1H), 7.53-7.47 (m, 3H), 7.46-7.44 (m, 2H), 7.41-7.38 (m, 2H), 7.33-7.32 (m, 3H), 7.11-7.09 (m, 1H), 7.00 (t,  $J$  = 1.8 Hz, 1H), 6.81 (d,  $J$  = 8.4 Hz, 1H), 5.36 (dd,  $J$  = 5.4 Hz, 3.0 Hz, 1H), 4.57 (dd,  $J$  = 19.8 Hz, 5.4 Hz, 1H);  $^{13}\text{C}\{^1\text{H}\}$  NMR (150 MHz,  $\text{CDCl}_3$ ):  $\delta$  = 151.1 (d,  $J_{\text{C-P}}$  = 9.0 Hz), 150.7 (d,  $J_{\text{C-P}}$  = 4.5 Hz), 133.2 (d,  $J_{\text{C-P}}$  = 3.0 Hz), 132.3 (d,  $J_{\text{C-P}}$  = 3.0 Hz), 132.2 (d,  $J_{\text{C-P}}$  = 3.0 Hz), 132.0 (d,  $J_{\text{C-P}}$  = 9.0 Hz), 131.9 (d,  $J_{\text{C-P}}$  = 9.0 Hz), 130.1 (d,  $J_{\text{C-P}}$  = 96.0 Hz), 129.4 (d,  $J_{\text{C-P}}$  = 96.0 Hz), 129.2 (d,  $J_{\text{C-P}}$  = 3.0 Hz), 129.1, 128.7, 128.6 (d,  $J_{\text{C-P}}$  = 4.5 Hz), 128.4, 128.3, 128.2 (d,  $J_{\text{C-P}}$  = 3.0 Hz), 124.7, 117.8 (d,  $J_{\text{C-P}}$  = 4.5 Hz), 117.7 (d,  $J_{\text{C-P}}$  = 1.5 Hz), 92.4 (d,  $J_{\text{C-P}}$  = 7.5 Hz), 40.7 (d,  $J_{\text{C-P}}$  = 67.5 Hz);  $^{31}\text{P}\{^1\text{H}\}$  NMR (243 MHz,  $\text{CDCl}_3$ ):  $\delta$  = 30.1; HRMS (ESI): Exact mass calcd for  $\text{C}_{27}\text{H}_{20}\text{ClO}_2\text{P}$   $[\text{M}+\text{H}]^+$ : 443.0962, Found: 443.0953.

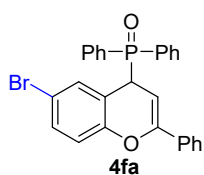

Column chromatography afforded the desired product **4fa** in 69% yield (100 mg) as yellow oil;  $^1\text{H}$  NMR (600 MHz,  $\text{CDCl}_3$ ):  $\delta$  = 7.75-7.70 (m, 4H), 7.58-7.56 (m, 1H), 7.54-7.51 (m, 1H), 7.50-7.47 (m, 2H), 7.45-7.44 (m, 2H), 7.42-7.39 (m, 2H), 7.33-7.32 (m, 3H), 7.26-7.24 (m, 1H), 7.09 (s, 1H), 6.76 (d,  $J$  = 8.4 Hz, 1H), 5.37 (dd,  $J$  = 5.4 Hz, 3.6

Hz, 1H), 4.56 (dd,  $J$  = 19.2 Hz, 5.4 Hz, 1H);  $^{13}\text{C}\{^1\text{H}\}$  NMR (150 MHz,  $\text{CDCl}_3$ ):  $\delta$  = 151.2 (d,  $J_{\text{C-P}}$  = 4.5 Hz), 151.1 (d,  $J_{\text{C-P}}$  = 9.0 Hz), 133.2 (d,  $J_{\text{C-P}}$  = 4.5 Hz), 132.3 (d,  $J_{\text{C-P}}$  = 3.0 Hz), 132.22 (d,  $J_{\text{C-P}}$  = 1.5 Hz), 132.18 (d,  $J_{\text{C-P}}$  = 1.5 Hz), 132.0 (d,  $J_{\text{C-P}}$  = 7.5 Hz), 131.9 (d,  $J_{\text{C-P}}$  = 9.0 Hz), 131.5 (d,  $J_{\text{C-P}}$  = 1.5 Hz), 130.0 (d,  $J_{\text{C-P}}$  = 94.5 Hz), 129.5 (d,  $J_{\text{C-P}}$  = 96.0 Hz), 129.1, 128.6 (d,  $J_{\text{C-P}}$  = 10.5 Hz), 128.37, 128.36 (d,  $J_{\text{C-P}}$  = 12.0 Hz), 124.8 (d,  $J_{\text{C-P}}$  = 1.5 Hz), 118.3 (d,  $J_{\text{C-P}}$  = 4.5 Hz), 118.1 (d,  $J_{\text{C-P}}$  = 1.5 Hz), 115.6 (d,  $J_{\text{C-P}}$  = 3.0 Hz), 92.4 (d,  $J_{\text{C-P}}$  = 6.0 Hz), 40.7 (d,  $J_{\text{C-P}}$  = 67.5 Hz);  $^{31}\text{P}\{^1\text{H}\}$  NMR (243 MHz,  $\text{CDCl}_3$ ):  $\delta$  = 30.7; HRMS (ESI): Exact mass calcd for  $\text{C}_{27}\text{H}_{20}\text{BrO}_2\text{P}$   $[\text{M}+\text{H}]^+$ : 487.0457, Found: 487.0443.

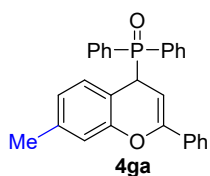

Column chromatography afforded the desired product **4ga** in 85% yield (107 mg) as yellow solid; Mp: 189-191 °C;  $^1\text{H}$  NMR (600 MHz,  $\text{CDCl}_3$ ):  $\delta$  = 7.73-7.70 (m, 4H), 7.56-7.54 (m, 1H), 7.50-7.44 (m, 5H), 7.38-7.32 (m, 5H), 6.95 (dd,  $J$  = 7.2 Hz, 1.8 Hz, 1H), 6.74-6.72 (m, 2H), 5.39 (dd,  $J$  = 4.8 Hz, 3.6 Hz, 1H), 4.63 (dd,  $J$  = 20.4 Hz, 5.4

Hz, 1H), 2.27 (s, 3H);  $^{13}\text{C}\{^1\text{H}\}$  NMR (150 MHz,  $\text{CDCl}_3$ ):  $\delta$  = 151.9 (d,  $J_{\text{C-P}}$  = 3.0 Hz), 151.1 (d,  $J_{\text{C-P}}$  = 9.0 Hz), 138.8 (d,  $J_{\text{C-P}}$  = 3.0 Hz), 133.7 (d,  $J_{\text{C-P}}$  = 3.0 Hz), 132.1 (d,  $J_{\text{C-P}}$  = 9.0 Hz), 132.0 (d,  $J_{\text{C-P}}$  = 9.0 Hz), 131.9 (d,  $J_{\text{C-P}}$  = 1.5 Hz), 130.5 (d,  $J_{\text{C-P}}$  = 94.5 Hz), 130.1 (d,  $J_{\text{C-P}}$  = 94.5 Hz), 129.3 (d,  $J_{\text{C-P}}$  = 3.0 Hz), 128.8, 128.5 (d,  $J_{\text{C-P}}$  = 10.5 Hz), 128.3, 128.2 (d,  $J_{\text{C-P}}$  = 12.0 Hz), 124.8 (d,  $J_{\text{C-P}}$  = 1.5 Hz), 124.5 (d,  $J_{\text{C-P}}$  = 1.5 Hz),

117.0 (d,  $J_{C-P} = 3.0$  Hz), 112.8 (d,  $J_{C-P} = 4.5$  Hz), 92.9 (d,  $J_{C-P} = 6.0$  Hz), 40.4 (d,  $J_{C-P} = 69.0$  Hz), 21.1;  $^{31}\text{P}\{^1\text{H}\}$  NMR (243 MHz,  $\text{CDCl}_3$ ):  $\delta = 30.3$ ; HRMS (ESI): Exact mass calcd for  $\text{C}_{28}\text{H}_{23}\text{O}_2\text{P}$   $[\text{M}+\text{H}]^+$ : 423.1508, Found: 423.1498.

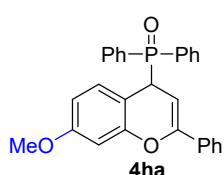

Column chromatography afforded the desired product **4ha** in 58% yield (76 mg) as yellow oil;  $^1\text{H}$  NMR (600 MHz,  $\text{CDCl}_3$ ):  $\delta = 7.73$ -7.69 (m, 4H), 7.57-7.54 (m, 1H),

7.51-7.45 (m, 5H), 7.38-7.35 (m, 2H), 7.34-7.32 (m, 3H), 6.98 (dd,  $J = 9.0$  Hz, 1.8 Hz, 1H), 6.52-6.50 (m, 1H), 6.44 (d,  $J = 2.4$  Hz, 1H), 5.40 (dd,  $J = 5.4$  Hz, 3.6 Hz, 1H),

4.61 (dd,  $J = 19.8$  Hz, 5.4 Hz, 1H), 3.75 (s, 3H);  $^{13}\text{C}\{^1\text{H}\}$  NMR (150 MHz,  $\text{CDCl}_3$ ):  $\delta = 160.0$  (d,  $J_{C-P} = 1.5$  Hz), 152.8 (d,  $J_{C-P} = 4.5$  Hz), 151.0 (d,  $J_{C-P} = 9.0$  Hz), 133.6 (d,  $J_{C-P} = 4.5$  Hz), 132.1 (d,  $J_{C-P} = 7.5$  Hz), 132.02, 132.015 (d,  $J_{C-P} = 7.5$  Hz), 131.95 (d,  $J_{C-P} = 3.0$  Hz), 130.4 (d,  $J_{C-P} = 94.5$  Hz), 130.2 (d,  $J_{C-P} = 1.5$  Hz), 130.0 (d,  $J_{C-P} = 93.0$  Hz), 128.9, 128.5 (d,  $J_{C-P} = 12.0$  Hz), 128.3, 128.2 (d,  $J_{C-P} = 12.0$  Hz), 124.8, 110.0, 107.8 (d,  $J_{C-P} = 3.0$  Hz), 101.8 (d,  $J_{C-P} = 1.5$  Hz), 93.2 (d,  $J_{C-P} = 7.5$  Hz), 55.4, 40.0 (d,  $J_{C-P} = 67.5$  Hz);  $^{31}\text{P}\{^1\text{H}\}$  NMR (243 MHz,  $\text{CDCl}_3$ ):  $\delta = 31.2$ ; HRMS (ESI): Exact mass calcd for  $\text{C}_{28}\text{H}_{23}\text{O}_3\text{P}$   $[\text{M}+\text{H}]^+$ : 439.1458, Found: 439.1457.

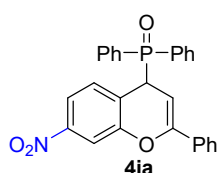

Column chromatography afforded the desired product **4ia** in 55% yield (75 mg) as yellow solid; Mp: 165-167 °C;  $^1\text{H}$  NMR (600 MHz,  $\text{CDCl}_3$ ):  $\delta = 7.81$ -7.76 (m, 3H),

7.71-7.68 (m, 3H), 7.63-7.60 (m, 1H), 7.54-7.50 (m, 3H), 7.46-7.45 (m, 2H), 7.39-7.35 (m, 6H), 5.34 (dd,  $J = 5.4$  Hz, 3.6 Hz, 1H), 4.71 (dd,  $J = 21.0$  Hz, 5.4 Hz, 1H);  $^{13}\text{C}\{^1\text{H}\}$

NMR (150 MHz,  $\text{CDCl}_3$ ):  $\delta = 152.3$  (d,  $J_{C-P} = 4.5$  Hz), 151.1 (d,  $J_{C-P} = 9.0$  Hz), 148.0 (d,  $J_{C-P} = 1.5$  Hz), 132.6 (d,  $J_{C-P} = 3.0$  Hz), 132.5 (d,  $J_{C-P} = 3.0$  Hz), 132.1 (d,  $J_{C-P} = 7.5$  Hz), 131.8 (d,  $J_{C-P} = 9.0$  Hz), 130.4 (d,  $J_{C-P} = 3.0$  Hz), 129.9 (d,  $J_{C-P} = 96.0$  Hz), 129.5, 128.9 (d,  $J_{C-P} = 10.5$  Hz), 128.63, 128.55, 128.5 (d,  $J_{C-P} = 96.0$  Hz), 128.4 (d,  $J_{C-P} = 10.5$  Hz), 124.7, 123.9 (d,  $J_{C-P} = 6.0$  Hz), 118.2 (d,  $J_{C-P} = 1.5$  Hz), 111.8 (d,  $J_{C-P} = 1.5$  Hz), 92.6 (d,  $J_{C-P} = 7.5$  Hz), 40.9 (d,  $J_{C-P} = 66.0$  Hz);  $^{31}\text{P}\{^1\text{H}\}$  NMR (243 MHz,  $\text{CDCl}_3$ ):  $\delta = 30.8$ ; HRMS (ESI): Exact mass calcd for  $\text{C}_{27}\text{H}_{20}\text{NO}_4\text{P}$   $[\text{M}+\text{H}]^+$ : 454.1203, Found: 454.1196.

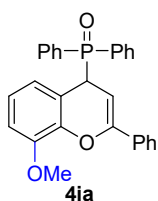

Column chromatography afforded the desired product **4ja** in 56% yield (74 mg) as yellow solid; Mp: 99-101 °C;  $^1\text{H}$  NMR (600 MHz,  $\text{CDCl}_3$ ):  $\delta = 7.74$ -7.71 (m, 4H), 7.57-7.54 (m,



1H), 7.53-7.51 (m, 2H), 7.49-7.45 (m, 3H), 7.37-7.31 (m, 5H), 6.88-6.85 (m, 1H), 6.77 (d,  $J = 8.4$  Hz, 1H), 6.72 (d,  $J = 7.8$  Hz, 1H), 5.38 (dd,  $J = 5.4$  Hz, 3.6 Hz, 1H), 4.67 (dd,  $J = 21.0$  Hz, 5.4 Hz, 1H), 3.81 (s, 3H);  $^{13}\text{C}\{^1\text{H}\}$  NMR (150 MHz,  $\text{CDCl}_3$ ):  $\delta = 151.0$  (d,  $J_{\text{C-P}} = 9.0$  Hz), 148.1 (d,  $J_{\text{C-P}} = 1.5$  Hz), 142.0 (d,  $J_{\text{C-P}} = 4.5$  Hz), 133.6 (d,  $J_{\text{C-P}} = 3.0$  Hz), 132.1 (d,  $J_{\text{C-P}} = 3.0$  Hz), 132.04 (d,  $J_{\text{C-P}} = 4.5$  Hz), 131.98 (d,  $J_{\text{C-P}} = 4.5$  Hz), 130.3 (d,  $J_{\text{C-P}} = 94.5$  Hz), 129.9 (d,  $J_{\text{C-P}} = 94.5$  Hz), 128.9, 128.5 (d,  $J_{\text{C-P}} = 12.0$  Hz), 128.4, 128.2 (d,  $J_{\text{C-P}} = 10.5$  Hz), 124.9, 123.2, 121.4 (d,  $J_{\text{C-P}} = 3.0$  Hz), 117.0 (d,  $J_{\text{C-P}} = 4.5$  Hz), 111.8, 92.8 (d,  $J_{\text{C-P}} = 6.0$  Hz), 56.4, 40.8 (d,  $J_{\text{C-P}} = 67.5$  Hz);  $^{31}\text{P}\{^1\text{H}\}$  NMR (243 MHz,  $\text{CDCl}_3$ ):  $\delta = 31.1$ ; HRMS (ESI): Exact mass calcd for  $\text{C}_{28}\text{H}_{23}\text{O}_3\text{P}$   $[\text{M}+\text{H}]^+$ : 439.1458, Found: 439.1451.

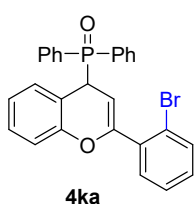

Column chromatography afforded the desired product **4ka** in 98% yield (142 mg) as

yellow oil;  $^1\text{H}$  NMR (600 MHz,  $\text{CDCl}_3$ ):  $\delta = 7.80$ -7.77 (m, 2H), 7.71-7.68 (m, 2H), 7.55-7.52 (m, 3H), 7.48-7.45 (m, 2H), 7.43-7.40 (m, 2H), 7.27-7.24 (m, 1H), 7.19-7.14 (m, 3H), 7.01-7.00 (m, 1H), 6.93-6.90 (m, 1H), 6.84 (d,  $J = 7.8$  Hz, 1H), 5.26 (dd,  $J = 4.8$

Hz, 3.0 Hz, 1H), 4.70 (dd,  $J = 20.4$  Hz, 5.4 Hz, 1H);  $^{13}\text{C}\{^1\text{H}\}$  NMR (150 MHz,  $\text{CDCl}_3$ ):  $\delta = 152.3$  (d,  $J_{\text{C-P}} = 3.0$  Hz), 151.4 (d,  $J_{\text{C-P}} = 7.5$  Hz), 135.5 (d,  $J_{\text{C-P}} = 3.0$  Hz), 133.3, 132.21 (d,  $J_{\text{C-P}} = 9.0$  Hz), 132.15, 132.1 (d,  $J_{\text{C-P}} = 7.5$  Hz), 130.8 (d,  $J_{\text{C-P}} = 1.5$  Hz), 130.4, 130.1 (d,  $J_{\text{C-P}} = 96.0$  Hz), 129.9 (d,  $J_{\text{C-P}} = 96.0$  Hz), 129.6 (d,  $J_{\text{C-P}} = 3.0$  Hz), 128.7 (d,  $J_{\text{C-P}} = 3.0$  Hz), 128.5 (d,  $J_{\text{C-P}} = 12.0$  Hz), 128.3 (d,  $J_{\text{C-P}} = 12.0$  Hz), 127.2, 123.7 (d,  $J_{\text{C-P}} = 1.5$  Hz), 122.1 (d,  $J_{\text{C-P}} = 3.0$  Hz), 116.6, 116.0 (d,  $J_{\text{C-P}} = 4.5$  Hz), 98.0 (d,  $J_{\text{C-P}} = 6.0$  Hz), 40.9 (d,  $J_{\text{C-P}} = 67.5$  Hz);  $^{31}\text{P}\{^1\text{H}\}$  NMR (243 MHz,  $\text{CDCl}_3$ ):  $\delta = 30.9$ ; HRMS (ESI): Exact mass calcd for  $\text{C}_{27}\text{H}_{20}\text{BrO}_2\text{P}$   $[\text{M}+\text{H}]^+$ : 487.0457, Found: 487.0455.

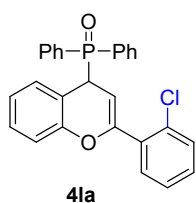

Column chromatography afforded the desired product **4la** in >99% yield (132 mg) as

green oil;  $^1\text{H}$  NMR (600 MHz,  $\text{CDCl}_3$ ):  $\delta = 7.80$ -7.77 (m, 2H), 7.72-7.69 (m, 2H), 7.56-7.54 (m, 1H), 7.52-7.50 (m, 1H), 7.48-7.45 (m, 2H), 7.42-7.39 (m, 2H), 7.35-7.33 (m, 1H), 7.26-7.21 (m, 3H), 7.16-7.13 (m, 1H), 7.06 (d,  $J = 7.8$  Hz, 1H), 6.94-6.92 (m, 1H),

6.81 (d,  $J = 8.4$  Hz, 1H), 5.32 (dd,  $J = 4.8$  Hz, 3.0 Hz, 1H), 4.70 (dd,  $J = 21.0$  Hz, 4.8 Hz, 1H);  $^{13}\text{C}\{^1\text{H}\}$  NMR (150 MHz,  $\text{CDCl}_3$ ):  $\delta = 152.2$  (d,  $J_{\text{C-P}} = 4.5$  Hz), 149.9 (d,  $J_{\text{C-P}} = 7.5$  Hz), 133.4 (d,  $J_{\text{C-P}} = 3.0$  Hz), 132.7 (d,  $J_{\text{C-P}} = 1.5$  Hz), 132.2 (d,  $J_{\text{C-P}} = 6.0$  Hz), 132.12 (d,  $J_{\text{C-P}} = 6.0$  Hz), 132.06 (d,  $J_{\text{C-P}} = 1.5$  Hz), 130.39 (d,  $J_{\text{C-P}} = 3.0$  Hz), 130.36, 130.12 (d,  $J_{\text{C-P}} = 96.0$  Hz), 130.11 (d,  $J_{\text{C-P}} = 15.0$  Hz), 130.0 (d,  $J_{\text{C-P}} = 96.0$  Hz), 129.6 (d,  $J_{\text{C-P}} = 3.0$  Hz), 128.7 (d,  $J_{\text{C-P}} = 3.0$  Hz), 128.4 (d,  $J_{\text{C-P}} = 30.0$  Hz), 128.3 (d,  $J_{\text{C-P}} = 30.0$  Hz), 126.6,

123.7 (d,  $J_{C-P} = 1.5$  Hz), 116.5 (d,  $J_{C-P} = 1.5$  Hz), 116.0 (d,  $J_{C-P} = 3.0$  Hz), 98.3 (d,  $J_{C-P} = 7.5$  Hz), 40.9 (d,  $J_{C-P} = 67.5$  Hz);  $^{31}\text{P}\{^1\text{H}\}$  NMR (243 MHz,  $\text{CDCl}_3$ ):  $\delta = 30.7$ ; HRMS (ESI): Exact mass calcd for  $\text{C}_{27}\text{H}_{20}\text{ClO}_2\text{P}$   $[\text{M}+\text{H}]^+$ : 443.0962, Found: 443.0953.

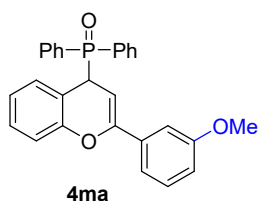

Column chromatography afforded the desired product **4ma** in 55% yield (73 mg) as yellow oil;  $^1\text{H}$  NMR (600 MHz,  $\text{CDCl}_3$ ):  $\delta = 7.73$ -7.68 (m, 4H), 7.56-7.55 (m, 1H), 7.49-7.45 (m, 3H), 7.37-7.34 (m, 2H), 7.24 (t,  $J = 8.4$  Hz, 1H), 7.14 (t,  $J = 7.8$  Hz, 1H), 7.10 (d,  $J = 7.2$  Hz, 1H), 7.05 (d,  $J = 7.8$  Hz, 1H), 7.01 (s, 1H), 7.93 (t,  $J = 7.2$  Hz, 1H), 6.88-6.85 (m, 2H), 5.38 (dd,  $J = 5.4$  Hz, 3.6 Hz, 1H), 4.68 (dd,  $J = 21.0$  Hz, 5.4 Hz, 1H), 3.80 (s, 3H);  $^{13}\text{C}\{^1\text{H}\}$  NMR (150 MHz,  $\text{CDCl}_3$ ):  $\delta = 159.6$ , 152.0 (d,  $J_{C-P} = 3.0$  Hz), 150.9 (d,  $J_{C-P} = 9.0$  Hz), 135.0 (d,  $J_{C-P} = 3.0$  Hz), 132.06 (d,  $J_{C-P} = 13.5$  Hz), 132.02 (d,  $J_{C-P} = 13.5$  Hz), 130.4 (d,  $J_{C-P} = 94.5$  Hz), 129.8 (d,  $J_{C-P} = 94.5$  Hz), 129.6 (d,  $J_{C-P} = 1.5$  Hz), 129.4, 128.6, 128.5 (d,  $J_{C-P} = 10.5$  Hz), 128.2 (d,  $J_{C-P} = 12.0$  Hz), 123.6, 117.3, 116.5, 116.0 (d,  $J_{C-P} = 4.5$  Hz), 114.3, 110.6, 93.2 (d,  $J_{C-P} = 6.0$  Hz), 55.3, 40.7 (d,  $J_{C-P} = 67.5$  Hz);  $^{31}\text{P}\{^1\text{H}\}$  NMR (243 MHz,  $\text{CDCl}_3$ ):  $\delta = 31.6$ ; HRMS (ESI): Exact mass calcd for  $\text{C}_{28}\text{H}_{23}\text{O}_3\text{P}$   $[\text{M}+\text{H}]^+$ : 439.1458, Found: 439.1456.

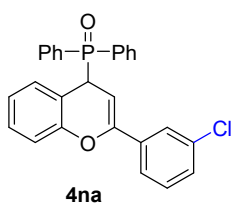

Column chromatography afforded the desired product **4na** in >99% yield (132 mg) as yellow oil;  $^1\text{H}$  NMR (600 MHz,  $\text{CDCl}_3$ ):  $\delta = 7.71$ -7.66 (m, 4H), 7.57-7.55 (m, 1H), 7.52-7.49 (m, 1H), 7.47-7.44 (m, 3H), 7.39-7.36 (m, 2H), 7.34-7.33 (m, 1H), 7.29-7.28 (m, 1H), 7.26-7.23 (m, 1H), 7.17-7.14 (m, 1H), 7.03-7.02 (m, 1H), 6.93-6.91 (m, 1H), 6.87 (d,  $J = 7.8$  Hz, 1H), 5.43 (dd,  $J = 4.8$  Hz, 3.0 Hz, 1H), 4.65 (dd,  $J = 19.8$  Hz, 5.4 Hz, 1H);  $^{13}\text{C}\{^1\text{H}\}$  NMR (150 MHz,  $\text{CDCl}_3$ ):  $\delta = 151.9$  (d,  $J_{C-P} = 4.5$  Hz), 149.9 (d,  $J_{C-P} = 9.0$  Hz), 135.3 (d,  $J_{C-P} = 3.0$  Hz), 134.4, 132.2 (d,  $J_{C-P} = 1.5$  Hz), 132.1 (d,  $J_{C-P} = 3.0$  Hz), 132.0 (d,  $J_{C-P} = 9.0$  Hz), 130.0 (d,  $J_{C-P} = 94.5$  Hz), 129.8 (d,  $J_{C-P} = 94.5$  Hz), 129.59, 129.57, 128.9, 128.7 (d,  $J_{C-P} = 3.0$  Hz), 128.44 (d,  $J_{C-P} = 39.0$  Hz), 128.36 (d,  $J_{C-P} = 39.0$  Hz), 124.9, 123.7 (d,  $J_{C-P} = 1.5$  Hz), 122.9 (d,  $J_{C-P} = 1.5$  Hz), 116.5 (d,  $J_{C-P} = 1.5$  Hz), 115.9 (d,  $J_{C-P} = 4.5$  Hz), 94.0 (d,  $J_{C-P} = 6.0$  Hz), 40.6 (d,  $J_{C-P} = 67.5$  Hz);  $^{31}\text{P}\{^1\text{H}\}$  NMR (243 MHz,  $\text{CDCl}_3$ ):  $\delta = 30.6$ ; HRMS (ESI): Exact mass calcd for  $\text{C}_{27}\text{H}_{20}\text{ClO}_2\text{P}$   $[\text{M}+\text{H}]^+$ : 443.0962, Found: 443.0956.

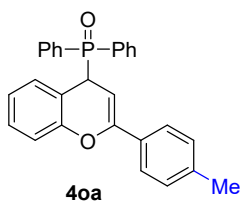

Column chromatography afforded the desired product **4oa** in 50% yield (63 mg) as yellow solid; Mp: 195-197 °C;  $^1\text{H}$  NMR (600 MHz,  $\text{CDCl}_3$ ):  $\delta = 7.72$ -7.70 (m, 4H),

7.56-7.54 (m, 1H), 7.49-7.45 (m, 3H), 7.37-7.33 (m, 4H), 7.16-7.12 (m, 4H), 6.94-6.91 (m, 1H), 6.85 (d,  $J = 7.8$  Hz, 1H), 5.33 (dd,  $J = 5.4$  Hz, 3.0 Hz, 1H), 4.65 (dd,  $J = 20.4$  Hz, 5.4 Hz, 1H), 2.35 (s, 3H);  $^{13}\text{C}\{^1\text{H}\}$  NMR (150 MHz,  $\text{CDCl}_3$ ):  $\delta = 152.1$  (d,  $J_{\text{C-P}} = 4.5$  Hz), 151.2 (d,  $J_{\text{C-P}} = 9.0$  Hz), 138.9, 132.1 (d,  $J_{\text{C-P}} = 7.5$  Hz), 132.04 (d,  $J_{\text{C-P}} = 3.0$  Hz), 131.97, 131.95 (d,  $J_{\text{C-P}} = 3.0$  Hz), 130.8 (d,  $J_{\text{C-P}} = 3.0$  Hz), 130.4 (d,  $J_{\text{C-P}} = 94.5$  Hz), 129.8 (d,  $J_{\text{C-P}} = 94.5$  Hz), 129.6 (d,  $J_{\text{C-P}} = 3.0$  Hz), 129.0, 128.6 (d,  $J_{\text{C-P}} = 3.0$  Hz), 128.5 (d,  $J_{\text{C-P}} = 10.5$  Hz), 128.1 (d,  $J_{\text{C-P}} = 10.5$  Hz), 124.7, 123.5 (d,  $J_{\text{C-P}} = 3.0$  Hz), 116.5 (d,  $J_{\text{C-P}} = 1.5$  Hz), 116.0 (d,  $J_{\text{C-P}} = 4.5$  Hz), 91.9 (d,  $J_{\text{C-P}} = 7.5$  Hz), 40.6 (d,  $J_{\text{C-P}} = 67.5$  Hz), 21.3;  $^{31}\text{P}\{^1\text{H}\}$  NMR (243 MHz,  $\text{CDCl}_3$ ):  $\delta = 30.6$ ; HRMS (ESI): Exact mass calcd for  $\text{C}_{28}\text{H}_{23}\text{O}_2\text{P}$   $[\text{M}+\text{H}]^+$ : 423.1508, Found: 423.1498.

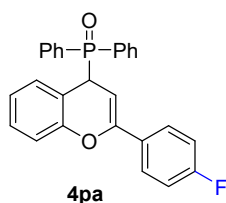

Column chromatography afforded the desired product **4pa** in 58% yield (75 mg) as yellow solid; Mp: 174-176 °C;  $^1\text{H}$  NMR (600 MHz,  $\text{CDCl}_3$ ):  $\delta = 7.72$ -7.67 (m, 4H), 7.56-7.54 (m, 1H), 7.51-7.49 (m, 1H), 7.47-7.43 (m, 4H), 7.38-7.35 (m, 2H), 7.17-7.14 (m, 1H), 7.04-6.99 (m, 3H), 6.93-6.90 (m, 1H), 6.86 (d,  $J = 7.8$  Hz, 1H), 5.34 (dd,  $J = 4.8$  Hz, 3.0 Hz, 1H), 4.66 (dd,  $J = 19.8$  Hz, 5.4 Hz, 1H);  $^{13}\text{C}\{^1\text{H}\}$  NMR (150

MHz,  $\text{CDCl}_3$ ):  $\delta = 163.1$  (d,  $J_{\text{C-F}} = 97.5$  Hz), 152.0 (d,  $J_{\text{C-P}} = 3.0$  Hz), 150.4 (d,  $J_{\text{C-P}} = 9.0$  Hz), 132.1 (d,  $J_{\text{C-P}} = 3.0$  Hz), 132.05 (d,  $J_{\text{C-P}} = 3.0$  Hz), 132.00 (d,  $J_{\text{C-P}} = 4.5$  Hz), 130.0 (d,  $J_{\text{C-P}} = 94.5$  Hz), 129.8 (d,  $J_{\text{C-P}} = 94.5$  Hz), 129.74 (d,  $J_{\text{C-P}} = 6.0$  Hz), 129.7, 129.6 (d,  $J_{\text{C-P}} = 3.0$  Hz), 128.7 (d,  $J_{\text{C-P}} = 3.0$  Hz), 128.5 (d,  $J_{\text{C-P}} = 12.0$  Hz), 128.2 (d,  $J_{\text{C-P}} = 10.5$  Hz), 126.7 (d,  $J_{\text{C-P}} = 7.5$  Hz), 123.6 (d,  $J_{\text{C-P}} = 1.5$  Hz), 116.5 (d,  $J_{\text{C-P}} = 3.0$  Hz), 116.0 (d,  $J_{\text{C-P}} = 3.0$  Hz), 115.3 (d,  $J_{\text{C-F}} = 21.0$  Hz), 92.5 (d,  $J_{\text{C-P}} = 7.5$  Hz), 40.5 (d,  $J_{\text{C-P}} = 67.5$  Hz);  $^{31}\text{P}\{^1\text{H}\}$  NMR (243 MHz,  $\text{CDCl}_3$ ):  $\delta = 31.3$ ;  $^{19}\text{F}\{^1\text{H}\}$  NMR (564 MHz,  $\text{CDCl}_3$ ):  $\delta = -112.2$  (1F); HRMS (ESI): Exact mass calcd for  $\text{C}_{27}\text{H}_{20}\text{FO}_2\text{P}$   $[\text{M}+\text{H}]^+$ : 427.1258, Found: 427.1252.

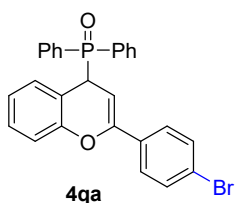

Column chromatography afforded the desired product **4qa** in 75% yield (110 mg) as white solid; Mp: 191-193 °C;  $^1\text{H}$  NMR (600 MHz,  $\text{CDCl}_3$ ):  $\delta = 7.71$ -7.66 (m, 4H), 7.56-7.54 (m, 1H), 7.51-7.48 (m, 1H), 7.46-7.44 (m, 4H), 7.38-7.35 (m, 2H), 7.34-7.32 (m, 2H), 7.16-7.14 (m, 1H), 7.02 (d,  $J = 7.8$  Hz, 1H), 6.92 (t,  $J = 7.8$  Hz, 1H),

6.85 (d,  $J = 7.8$  Hz, 1H), 5.41 (dd,  $J = 4.8$  Hz, 3.0 Hz, 1H), 4.64 (dd,  $J = 19.8$  Hz, 4.8 Hz, 1H);  $^{13}\text{C}\{^1\text{H}\}$  NMR (150 MHz,  $\text{CDCl}_3$ ):  $\delta = 151.9$  (d,  $J_{\text{C-P}} = 3.0$  Hz), 151.2 (d,  $J_{\text{C-P}} = 9.0$  Hz), 132.4 (d,  $J_{\text{C-P}} = 3.0$  Hz), 132.1, 132.04, 131.98 (d,  $J_{\text{C-P}} = 3.0$  Hz), 131.5, 130.0 (d,  $J_{\text{C-P}} = 94.5$  Hz), 129.9 (d,  $J_{\text{C-P}} = 94.5$  Hz), 129.6, 128.7, 128.5 (d,  $J_{\text{C-P}} = 10.5$  Hz), 128.2 (d,  $J_{\text{C-P}} = 10.5$  Hz), 126.3, 123.7, 123.0, 116.5, 115.9 (d,  $J_{\text{C-P}} = 4.5$

Hz), 93.3 (d,  $J_{C-P} = 6.0$  Hz), 40.6 (d,  $J_{C-P} = 67.5$  Hz);  $^{31}\text{P}\{^1\text{H}\}$  NMR (243 MHz,  $\text{CDCl}_3$ ):  $\delta = 31.1$ ; HRMS (ESI): Exact mass calcd for  $\text{C}_{27}\text{H}_{20}\text{BrO}_2\text{P}$   $[\text{M}+\text{H}]^+$ : 487.0457, Found: 487.0447.

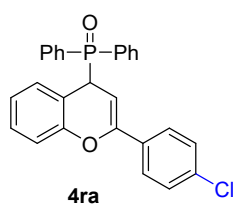

Column chromatography afforded the desired product **4ra** in 77% yield (102 mg) as white solid; Mp: 187-189 °C;  $^1\text{H}$  NMR (600 MHz,  $\text{CDCl}_3$ ):  $\delta = 7.71$ -7.67 (m, 4H), 7.56-7.54 (m, 1H), 7.51-7.49 (m, 1H), 7.47-7.44 (m, 3H), 7.41-7.39 (m, 1H), 7.38-

7.35 (m, 2H), 7.34-7.33 (m, 1H), 7.30-7.28 (m, 1H), 7.15 (t,  $J = 7.2$  Hz, 1H), 7.03 (d,  $J = 7.2$  Hz, 1H), 6.92 (t,  $J = 7.8$  Hz, 1H), 6.86 (d,  $J = 8.4$  Hz, 1H), 5.41-5.40 (m, 1H), 4.64 (dt,  $J = 19.8$  Hz, 4.8 Hz, 1H);  $^{13}\text{C}\{^1\text{H}\}$  NMR (150 MHz,  $\text{CDCl}_3$ ):  $\delta = 151.9$ , 150.2 (d,  $J_{C-P} = 7.5$  Hz), 134.8, 132.4 (d,  $J_{C-P} = 4.5$  Hz), 132.1, 132.05 (d,  $J_{C-P} = 3.0$  Hz), 132.00 (d,  $J_{C-P} = 3.0$  Hz), 131.5, 130.1 (d,  $J_{C-P} = 94.5$  Hz), 129.9 (d,  $J_{C-P} = 94.5$  Hz), 129.6 (d,  $J_{C-P} = 3.0$  Hz), 128.7, 128.5 (d,  $J_{C-P} = 10.5$  Hz), 128.2 (d,  $J_{C-P} = 10.5$  Hz), 126.2 (d,  $J_{C-P} = 39.0$  Hz), 123.7, 123.0, 116.5, 116.0, 93.3 (d,  $J_{C-P} = 15.0$  Hz), 40.6 (d,  $J_{C-P} = 67.5$  Hz);  $^{31}\text{P}\{^1\text{H}\}$  NMR (243 MHz,  $\text{CDCl}_3$ ):  $\delta = 31.1$ ; HRMS (ESI): Exact mass calcd for  $\text{C}_{27}\text{H}_{20}\text{ClO}_2\text{P}$   $[\text{M}+\text{H}]^+$ : 443.0962, Found: 443.0956.

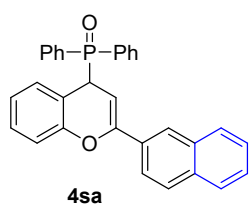

Column chromatography afforded the desired product **4sa** in 40% yield (59 mg) as brown oil;  $^1\text{H}$  NMR (600 MHz,  $\text{CDCl}_3$ ):  $\delta = 8.01$  (s, 1H), 7.86-7.84 (m, 1H), 7.82-7.80 (m, 1H), 7.78-7.77 (m, 1H), 7.75-7.72 (m, 4H), 7.57-7.55 (m, 1H), 7.53-7.51 (m, 1H), 7.50-7.46 (m, 5H), 7.37-7.34 (m, 2H), 7.18 (t,  $J = 7.8$  Hz, 1H), 7.12 (d,  $J =$

7.8 Hz, 1H), 6.96-6.94 (m, 2H), 5.56 (dd,  $J = 5.4$  Hz, 3.6 Hz, 1H), 4.71 (dd,  $J = 20.4$  Hz, 5.4 Hz, 1H);  $^{13}\text{C}\{^1\text{H}\}$  NMR (150 MHz,  $\text{CDCl}_3$ ):  $\delta = 152.1$  (d,  $J_{C-P} = 3.0$  Hz), 151.0 (d,  $J_{C-P} = 9.0$  Hz), 133.4, 133.0, 132.1 (d,  $J_{C-P} = 9.0$  Hz), 132.0 (d,  $J_{C-P} = 3.0$  Hz), 130.6 (d,  $J_{C-P} = 3.0$  Hz), 130.1 (d,  $J_{C-P} = 94.5$  Hz), 129.8 (d,  $J_{C-P} = 96.0$  Hz), 129.6 (d,  $J_{C-P} = 3.0$  Hz), 128.7 (d,  $J_{C-P} = 1.5$  Hz), 128.54, 128.46 (d,  $J_{C-P} = 1.5$  Hz), 128.2 (d,  $J_{C-P} = 10.5$  Hz), 128.0, 127.6, 126.5 (d,  $J_{C-P} = 15.0$  Hz), 124.0, 123.6 (d,  $J_{C-P} = 3.0$  Hz), 122.3, 116.5 (d,  $J_{C-P} = 3.0$  Hz), 116.1 (d,  $J_{C-P} = 4.5$  Hz), 93.4 (d,  $J_{C-P} = 6.0$  Hz), 40.8 (d,  $J_{C-P} = 67.5$  Hz);  $^{31}\text{P}\{^1\text{H}\}$  NMR (243 MHz,  $\text{CDCl}_3$ ):  $\delta = 31.3$ ; HRMS (ESI): Exact mass calcd for  $\text{C}_{31}\text{H}_{23}\text{O}_2\text{P}$   $[\text{M}+\text{H}]^+$ : 459.1508, Found: 459.1500.

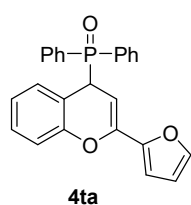

Column chromatography afforded the desired product **4ta** in 76% yield (49 mg) as yellow solid; Mp: 187-189 °C;  $^1\text{H}$  NMR (600 MHz,  $\text{CDCl}_3$ ):  $\delta = 7.75$ -7.72 (m, 2H), 7.70-7.67 (m, 2H), 7.57-7.55 (m, 1H), 7.49-7.46 (m, 3H), 7.36-7.32 (m, 3H), 7.14-7.12 (m, 2H),

6.92 (td,  $J = 7.2$  Hz, 1.2 Hz, 1H), 6.82-6.81 (m, 1H), 6.50 (d,  $J = 3.6$  Hz, 1H), 6.39 (dd,  $J = 3.0$  Hz, 1.8 Hz, 1H), 5.43 (dd,  $J = 5.4$  Hz, 3.0 Hz, 1H), 4.62 (dd,  $J = 20.4$  Hz, 5.4 Hz, 1H);  $^{13}\text{C}\{^1\text{H}\}$  NMR (150 MHz,  $\text{CDCl}_3$ ):  $\delta = 151.6$  (d,  $J_{\text{C-P}} = 3.0$  Hz), 148.0 (d,  $J_{\text{C-P}} = 4.5$  Hz), 144.0 (d,  $J_{\text{C-P}} = 9.0$  Hz), 142.8, 132.1, 132.03 (d,  $J_{\text{C-P}} = 3.0$  Hz), 131.95 (d,  $J_{\text{C-P}} = 3.0$  Hz), 130.6 (d,  $J_{\text{C-P}} = 94.5$  Hz), 129.8 (d,  $J_{\text{C-P}} = 3.0$  Hz), 129.7 (d,  $J_{\text{C-P}} = 96.0$  Hz), 128.62, 128.56 (d,  $J_{\text{C-P}} = 10.5$  Hz), 128.1 (d,  $J_{\text{C-P}} = 10.5$  Hz), 123.6 (d,  $J_{\text{C-P}} = 3.0$  Hz), 116.4 (d,  $J_{\text{C-P}} = 3.0$  Hz), 116.0 (d,  $J_{\text{C-P}} = 4.5$  Hz), 111.2, 107.3 (d,  $J_{\text{C-P}} = 1.5$  Hz), 91.6 (d,  $J_{\text{C-P}} = 7.5$  Hz), 39.9 (d,  $J_{\text{C-P}} = 69.0$  Hz);  $^{31}\text{P}\{^1\text{H}\}$  NMR (243 MHz,  $\text{CDCl}_3$ ):  $\delta = 30.2$ ; HRMS (ESI): Exact mass calcd for  $\text{C}_{25}\text{H}_{19}\text{O}_3\text{P}$   $[\text{M}+\text{H}]^+$ : 399.1145, Found: 399.1135.

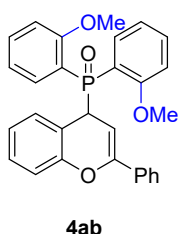

Column chromatography afforded the desired product **4ab** in 21% yield (30 mg) as white oil;  $^1\text{H}$  NMR (600 MHz,  $\text{CDCl}_3$ ):  $\delta = 7.70$ -7.66 (m, 1H), 7.50-7.42 (m, 4H), 7.40-7.38 (m, 1H), 7.31-7.27 (m, 3H), 7.24-7.22 (m, 1H), 7.05-7.02 (m, 1H), 6.98-6.92 (m, 3H), 6.88-6.87 (m, 1H), 6.79 (t,  $J = 7.2$  Hz, 1H), 6.75 (dd,  $J = 8.4$  Hz, 5.4 Hz, 1H), 5.53 (t,  $J = 4.8$  Hz, 1H), 5.11 (dd,  $J = 25.2$  Hz, 5.4 Hz, 1H), 3.77 (s, 3H), 3.54 (s, 3H);  $^{13}\text{C}\{^1\text{H}\}$  NMR

(150 MHz,  $\text{CDCl}_3$ ):  $\delta = 160.7$  (d,  $J_{\text{C-P}} = 6.0$  Hz), 160.3 (d,  $J_{\text{C-P}} = 6.0$  Hz), 151.6 (d,  $J_{\text{C-P}} = 6.0$  Hz), 149.7 (d,  $J_{\text{C-P}} = 16.5$  Hz), 135.8 (d,  $J_{\text{C-P}} = 9.0$  Hz), 134.8 (d,  $J_{\text{C-P}} = 9.0$  Hz), 134.4 (d,  $J_{\text{C-P}} = 4.5$  Hz), 133.7 (d,  $J_{\text{C-P}} = 3.0$  Hz), 133.6 (d,  $J_{\text{C-P}} = 3.0$  Hz), 129.4 (d,  $J_{\text{C-P}} = 6.0$  Hz), 128.4, 128.2, 127.9 (d,  $J_{\text{C-P}} = 3.0$  Hz), 124.6 (d,  $J_{\text{C-P}} = 3.0$  Hz), 123.0 (d,  $J_{\text{C-P}} = 3.0$  Hz), 120.8 (d,  $J_{\text{C-P}} = 18.0$  Hz), 120.6 (d,  $J_{\text{C-P}} = 16.5$  Hz), 119.7 (d,  $J_{\text{C-P}} = 142.5$  Hz), 118.4 (d,  $J_{\text{C-P}} = 141.0$  Hz), 117.6 (d,  $J_{\text{C-P}} = 7.5$  Hz), 116.0 (d,  $J_{\text{C-P}} = 3.0$  Hz), 110.6 (d,  $J_{\text{C-P}} = 10.5$  Hz), 109.9 (d,  $J_{\text{C-P}} = 10.5$  Hz), 94.6 (d,  $J_{\text{C-P}} = 10.5$  Hz), 55.5, 55.1, 41.6 (d,  $J_{\text{C-P}} = 106.5$  Hz);  $^{31}\text{P}\{^1\text{H}\}$  NMR (243 MHz,  $\text{CDCl}_3$ ):  $\delta = 39.6$ ; HRMS (ESI): Exact mass calcd for  $\text{C}_{29}\text{H}_{25}\text{O}_4\text{P}$   $[\text{M}+\text{H}]^+$ : 469.1563, Found: 469.1559.

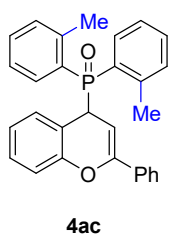

Column chromatography afforded **4ac** in 74% yield (96 mg) as yellow solid; Mp: 142-144 °C;  $^1\text{H}$  NMR (600 MHz,  $\text{CDCl}_3$ ):  $\delta = 7.62$ -7.59 (m, 1H), 7.47-7.42 (m, 3H), 7.36-7.27 (m, 6H), 7.25-7.20 (m, 3H), 7.12-7.10 (m, 1H), 7.01-6.94 (m, 3H), 5.49 (dd,  $J = 5.4$  Hz, 3.0 Hz, 1H), 4.80 (dd,  $J = 18.0$  Hz, 5.4 Hz, 1H), 2.32 (s, 3H), 2.16 (s, 3H);  $^{13}\text{C}\{^1\text{H}\}$  NMR (150 MHz,  $\text{CDCl}_3$ ):  $\delta = 152.5$  (d,  $J_{\text{C-P}} = 3.0$  Hz), 151.5 (d,  $J_{\text{C-P}} = 9.0$  Hz), 143.7 (d,  $J_{\text{C-P}} = 7.5$  Hz), 143.4 (d,  $J_{\text{C-P}} = 6.0$  Hz), 133.6 (d,  $J_{\text{C-P}} = 3.0$  Hz), 132.3 (d,  $J_{\text{C-P}} = 10.5$  Hz), 132.0 (d,  $J_{\text{C-P}} = 10.5$  Hz), 131.8 (d,  $J_{\text{C-P}} = 3.0$  Hz), 131.5 (d,  $J_{\text{C-P}} = 3.0$  Hz), 131.0 (d,  $J_{\text{C-P}} = 10.5$  Hz), 130.7 (d,  $J_{\text{C-P}} = 91.5$  Hz), 130.6

(d,  $J_{C-P} = 3.0$  Hz). 128.8, 128.6 (d,  $J_{C-P} = 3.0$  Hz), 128.2, 125.4 (d,  $J_{C-P} = 12.0$  Hz), 124.8, 124.5 (d,  $J_{C-P} = 12.0$  Hz), 123.5 (d,  $J_{C-P} = 1.5$  Hz), 116.3 (d,  $J_{C-P} = 1.5$  Hz), 116.0 (d,  $J_{C-P} = 4.5$  Hz), 93.6 (d,  $J_{C-P} = 7.5$  Hz), 40.3 (d,  $J_{C-P} = 67.5$  Hz), 21.4 (d,  $J_{C-P} = 4.5$  Hz), 21.0 (d,  $J_{C-P} = 3.0$  Hz);  $^{31}\text{P}\{^1\text{H}\}$  NMR (243 MHz,  $\text{CDCl}_3$ ):  $\delta = 36.1$ ; HRMS (ESI): Exact mass calcd for  $\text{C}_{29}\text{H}_{25}\text{O}_2\text{P}$   $[\text{M}+\text{H}]^+$ : 437.1665, Found: 437.1663.

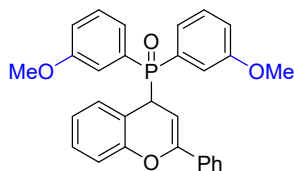

**4ad**

Column chromatography afforded **4ad** in 63% yield (89 mg) as yellow oil;  $^1\text{H}$  NMR (600 MHz,  $\text{CDCl}_3$ ):  $\delta = 7.70$ -7.66 (m, 1H), 7.50-7.42 (m, 4H), 7.40-7.38 (m, 1H), 7.30-7.27 (m, 3H), 7.24-7.23 (m, 1H), 7.05-7.02 (m, 1H), 6.97-6.92 (m, 3H), 6.88-6.87 (m, 1H), 6.81-6.78 (m, 1H), 6.75 (dd,  $J = 8.4$  Hz, 5.4 Hz, 1H), 5.54 (t,  $J = 4.8$  Hz, 1H), 5.12 (dd,  $J = 25.2$  Hz, 4.8 Hz, 1H), 3.76 (s, 3H), 3.54 (s, 3H);  $^{13}\text{C}\{^1\text{H}\}$  NMR (150 MHz,  $\text{CDCl}_3$ ):  $\delta = 160.7$  (d,  $J_{C-P} = 3.0$  Hz), 160.2 (d,  $J_{C-P} = 3.0$  Hz), 151.6, 149.6 (d,  $J_{C-P} = 15.0$  Hz), 135.7 (d,  $J_{C-P} = 4.5$  Hz), 134.8 (d,  $J_{C-P} = 7.5$  Hz), 134.3 (d,  $J_{C-P} = 3.0$  Hz), 133.6 (d,  $J_{C-P} = 21.0$  Hz), 129.4 (d,  $J_{C-P} = 3.0$  Hz), 128.4, 128.2, 127.9, 124.6, 123.0, 120.8 (d,  $J_{C-P} = 10.5$  Hz), 120.6 (d,  $J_{C-P} = 10.5$  Hz), 119.6 (d,  $J_{C-P} = 94.5$  Hz), 118.3 (d,  $J_{C-P} = 94.5$  Hz), 117.6 (d,  $J_{C-P} = 4.5$  Hz), 116.0, 110.6 (d,  $J_{C-P} = 6.0$  Hz), 109.9 (d,  $J_{C-P} = 6.0$  Hz), 94.6, 55.5, 55.1, 41.6 (d,  $J_{C-P} = 70.5$  Hz);  $^{31}\text{P}\{^1\text{H}\}$  NMR (243 MHz,  $\text{CDCl}_3$ ):  $\delta = 39.6$ ; HRMS (ESI): Exact mass calcd for  $\text{C}_{29}\text{H}_{25}\text{O}_4\text{P}$   $[\text{M}+\text{H}]^+$ : 469.1563, Found: 469.1558.

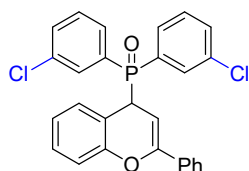

**4ae**

Column chromatography afforded **4ae** in 48% yield (68 mg) as yellow solid; Mp: 138-140 °C;  $^1\text{H}$  NMR (600 MHz,  $\text{CDCl}_3$ ):  $\delta = 7.68$ -7.65 (m, 2H), 7.60-7.54 (m, 3H), 7.52-7.47 (m, 3H), 7.44-7.41 (m, 1H), 7.38-7.35 (m, 3H), 7.32-7.29 (m, 1H), 7.21-7.19 (m, 1H), 7.11-7.09 (m, 1H), 6.98 (t,  $J = 7.2$  Hz, 1H), 6.92 (d,  $J = 8.4$  Hz, 1H), 5.37 (dd,  $J = 5.4$  Hz, 3.0 Hz, 1H), 4.65 (dd,  $J = 20.4$  Hz, 5.4 Hz, 1H);  $^{13}\text{C}\{^1\text{H}\}$  NMR (150 MHz,  $\text{CDCl}_3$ ):  $\delta = 152.0$  (d,  $J_{C-P} = 4.5$  Hz), 151.9 (d,  $J_{C-P} = 10.5$  Hz), 135.2 (d,  $J_{C-P} = 15.0$  Hz), 134.9 (d,  $J_{C-P} = 15.0$  Hz), 133.2 (d,  $J_{C-P} = 3.0$  Hz), 132.5 (d,  $J_{C-P} = 1.5$  Hz), 132.4, 132.0 (d,  $J_{C-P} = 9.0$  Hz), 131.8 (d,  $J_{C-P} = 9.0$  Hz), 131.4, 130.1 (d,  $J_{C-P} = 12.0$  Hz), 130.0 (d,  $J_{C-P} = 9.0$  Hz), 129.9 (d,  $J_{C-P} = 7.5$  Hz), 129.7 (d,  $J_{C-P} = 13.5$  Hz), 129.5 (d,  $J_{C-P} = 3.0$  Hz), 129.2, 129.1 (d,  $J_{C-P} = 3.0$  Hz), 128.4, 124.9, 123.9 (d,  $J_{C-P} = 3.0$  Hz), 116.7, 115.2 (d,  $J_{C-P} = 4.5$  Hz), 91.9 (d,  $J_{C-P} = 7.5$  Hz), 40.7 (d,  $J_{C-P} = 69.0$  Hz);  $^{31}\text{P}\{^1\text{H}\}$  NMR (243 MHz,  $\text{CDCl}_3$ ):  $\delta = 28.3$ ; HRMS (ESI): Exact mass calcd for  $\text{C}_{27}\text{H}_{19}\text{Cl}_2\text{O}_2\text{P}$   $[\text{M}+\text{H}]^+$ : 477.0572, Found: 477.0565.

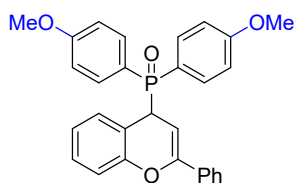

**4af**

Column chromatography afforded the desired product **4af** in 34% yield (47 mg)

as white solid; Mp: 175-177 °C;  $^1\text{H}$  NMR (600 MHz,  $\text{CDCl}_3$ ):  $\delta$  = 7.62-7.56 (m, 4H), 7.50-7.48 (m, 2H), 7.34-7.31 (m, 3H), 7.16-7.10 (m, 2H), 6.96-6.91 (m, 3H), 6.87-6.83 (m, 3H), 5.41 (dd,  $J$  = 7.8 Hz, 4.8 Hz, 1H), 4.59 (dd,  $J$  = 31.8 Hz, 8.4 Hz, 1H), 3.83 (s, 3H), 3.79 (s, 3H);  $^{13}\text{C}\{^1\text{H}\}$  NMR (150 MHz,  $\text{CDCl}_3$ ):  $\delta$  = 162.5, 152.0 (d,  $J_{\text{C-P}}$  = 6.0 Hz), 150.8 (d,  $J_{\text{C-P}}$  = 13.5 Hz), 134.0, 133.9 (d,  $J_{\text{C-P}}$  = 1.5 Hz), 133.8, 133.7 (d,  $J_{\text{C-P}}$  = 4.5 Hz), 129.7 (d,  $J_{\text{C-P}}$  = 4.5 Hz), 128.8, 128.5 (d,  $J_{\text{C-P}}$  = 4.5 Hz), 128.3, 124.8 (d,  $J_{\text{C-P}}$  = 1.5 Hz), 123.5 (d,  $J_{\text{C-P}}$  = 4.5 Hz), 121.5 (d,  $J_{\text{C-P}}$  = 151.5 Hz), 121.2 (d,  $J_{\text{C-P}}$  = 151.5 Hz), 116.5, 116.4 (d,  $J_{\text{C-P}}$  = 3.0 Hz), 114.1 (d,  $J_{\text{C-P}}$  = 19.5 Hz), 113.8 (d,  $J_{\text{C-P}}$  = 18.0 Hz), 93.3 (d,  $J_{\text{C-P}}$  = 10.5 Hz), 55.32, 55.26, 40.8 (d,  $J_{\text{C-P}}$  = 103.5 Hz);  $^{31}\text{P}\{^1\text{H}\}$  NMR (243 MHz,  $\text{CDCl}_3$ ):  $\delta$  = 30.8; HRMS (ESI): Exact mass calcd for  $\text{C}_{29}\text{H}_{25}\text{O}_4\text{P}$   $[\text{M}+\text{H}]^+$ : 469.1563, Found: 469.1555.

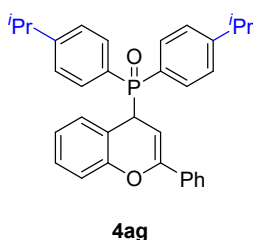

Column chromatography afforded **4ag** in 62% yield (58 mg) as yellow solid; Mp: 165-167 °C;  $^1\text{H}$  NMR (600 MHz,  $\text{CDCl}_3$ ):  $\delta$  = 7.65-7.58 (m, 4H), 7.48-7.46 (m, 2H), 7.34-7.30 (m, 5H), 7.20-7.11 (m, 4H), 6.93-6.91 (m, 1H), 6.85 (d,  $J$  = 7.8 Hz, 1H), 5.40-5.39 (m, 1H), 4.61 (dd,  $J$  = 20.4 Hz, 5.4 Hz, 1H), 2.96-2.88 (m, 2H), 1.26 (d,  $J$  = 6.6 Hz, 6H), 1.22 (d,  $J$  = 7.2 Hz, 6H);  $^{13}\text{C}\{^1\text{H}\}$  NMR (150 MHz,  $\text{CDCl}_3$ ):  $\delta$  = 153.2 (d,  $J_{\text{C-P}}$  = 1.5 Hz), 153.1 (d,  $J_{\text{C-P}}$  = 1.5 Hz), 152.0 (d,  $J_{\text{C-P}}$  = 3.0 Hz), 150.8 (d,  $J_{\text{C-P}}$  = 9.0 Hz), 133.8 (d,  $J_{\text{C-P}}$  = 3.0 Hz), 132.13 (d,  $J_{\text{C-P}}$  = 18.0 Hz), 132.1, 129.7 (d,  $J_{\text{C-P}}$  = 3.0 Hz), 128.8, 128.4 (d,  $J_{\text{C-P}}$  = 1.5 Hz), 128.2, 127.6 (d,  $J_{\text{C-P}}$  = 97.5 Hz), 127.0 (d,  $J_{\text{C-P}}$  = 97.5 Hz), 126.6 (d,  $J_{\text{C-P}}$  = 12.0 Hz), 126.3 (d,  $J_{\text{C-P}}$  = 10.5 Hz), 124.8, 123.4 (d,  $J_{\text{C-P}}$  = 1.5 Hz), 116.4 (d,  $J_{\text{C-P}}$  = 1.5 Hz), 116.3 (d,  $J_{\text{C-P}}$  = 4.5 Hz), 93.3 (d,  $J_{\text{C-P}}$  = 6.0 Hz), 40.7 (d,  $J_{\text{C-P}}$  = 67.5 Hz), 34.2, 34.1, 23.74, 23.68;  $^{31}\text{P}\{^1\text{H}\}$  NMR (243 MHz,  $\text{CDCl}_3$ ):  $\delta$  = 31.0; HRMS (ESI): Exact mass calcd for  $\text{C}_{33}\text{H}_{33}\text{O}_2\text{P}$   $[\text{M}+\text{H}]^+$ : 493.2291, Found: 493.2287.

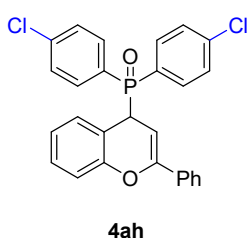

Column chromatography afforded the desired product **4ah** in 59% yield (85 mg) as white solid; Mp: 214-216 °C;  $^1\text{H}$  NMR (600 MHz,  $\text{CDCl}_3$ ):  $\delta$  = 7.64-7.58 (m, 4H), 7.50-7.44 (m, 4H), 7.36-7.33 (m, 5H), 7.21-7.16 (m, 1H), 7.13-7.11 (m, 1H), 6.99-6.95 (m, 1H), 6.90 (d,  $J$  = 12.0 Hz, 1H), 5.37 (dd,  $J$  = 7.8 Hz, 4.8 Hz, 1H), 4.63 (dd,  $J$  = 31.2 Hz, 8.4 Hz, 1H);  $^{13}\text{C}\{^1\text{H}\}$  NMR (150 MHz,  $\text{CDCl}_3$ ):  $\delta$  = 152.0 (d,  $J_{\text{C-P}}$  = 6.0 Hz), 151.6 (d,  $J_{\text{C-P}}$  = 15.0 Hz), 139.0 (d,  $J_{\text{C-P}}$  = 4.5 Hz), 138.9 (d,  $J_{\text{C-P}}$  = 4.5 Hz), 133.4 (d,  $J_{\text{C-P}}$  = 10.5 Hz), 133.3 (d,  $J_{\text{C-P}}$  = 10.5 Hz), 133.2, 129.6 (d,  $J_{\text{C-P}}$  = 4.5 Hz), 129.2 (d,  $J_{\text{C-P}}$  = 19.5 Hz), 129.00, 128.97, 128.7 (d,  $J_{\text{C-P}}$  = 18.0 Hz), 128.54 (d,  $J_{\text{C-P}}$  = 144.0 Hz), 128.48, 128.1 (d,  $J_{\text{C-P}}$  = 144.0 Hz), 124.8 (d,  $J_{\text{C-P}}$  = 1.5 Hz),

123.8 (d,  $J_{C-P} = 3.0$  Hz), 116.7 (d,  $J_{C-P} = 3.0$  Hz), 115.5 (d,  $J_{C-P} = 6.0$  Hz), 92.1 (d,  $J_{C-P} = 9.0$  Hz), 40.7 (d,  $J_{C-P} = 103.5$  Hz);  $^{31}\text{P}\{^1\text{H}\}$  NMR (243 MHz,  $\text{CDCl}_3$ ):  $\delta = 29.1$ ; HRMS (ESI): Exact mass calcd for  $\text{C}_{27}\text{H}_{19}\text{Cl}_2\text{O}_2\text{P}$   $[\text{M}+\text{H}]^+$ : 477.0572, Found: 477.0565.

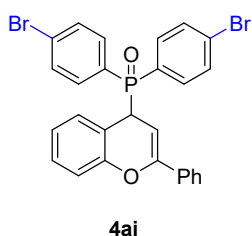

Column chromatography afforded the desired product **4ai** in 57% yield (96 mg) as white solid; Mp: 224-226 °C;  $^1\text{H}$  NMR (600 MHz,  $\text{CDCl}_3$ ):  $\delta = 7.63$ -7.61 (m, 2H), 7.55-7.49 (m, 8H), 7.38-7.35 (m, 3H), 7.20-7.17 (m, 1H), 7.13-7.11 (m, 1H), 6.99-6.96 (m, 1H), 6.90 (d,  $J = 8.4$  Hz, 1H), 5.37 (dd,  $J = 4.8$  Hz, 3.0 Hz, 1H), 4.63 (dd,  $J = 20.4$  Hz, 5.4 Hz, 1H);  $^{13}\text{C}\{^1\text{H}\}$  NMR (150 MHz,  $\text{CDCl}_3$ ):  $\delta = 151.9$  (d,  $J_{C-P} = 3.0$  Hz), 151.6 (d,  $J_{C-P} = 9.0$  Hz), 133.42 (d,  $J_{C-P} = 18.0$  Hz), 133.4, 133.2 (d,  $J_{C-P} = 4.5$  Hz), 131.9 (d,  $J_{C-P} = 10.5$  Hz), 131.6 (d,  $J_{C-P} = 12.0$  Hz), 129.6 (d,  $J_{C-P} = 3.0$  Hz), 129.2, 129.01 (d,  $J_{C-P} = 94.5$  Hz), 128.98 (d,  $J_{C-P} = 1.5$  Hz), 128.6 (d,  $J_{C-P} = 94.5$  Hz), 128.5, 127.61 (d,  $J_{C-P} = 3.0$  Hz), 127.56 (d,  $J_{C-P} = 3.0$  Hz), 124.8, 123.8 (d,  $J_{C-P} = 3.0$  Hz), 116.7 (d,  $J_{C-P} = 3.0$  Hz), 115.4 (d,  $J_{C-P} = 6.0$  Hz), 92.1 (d,  $J_{C-P} = 7.5$  Hz), 40.6 (d,  $J_{C-P} = 69.0$  Hz);  $^{31}\text{P}\{^1\text{H}\}$  NMR (243 MHz,  $\text{CDCl}_3$ ):  $\delta = 29.3$ ; HRMS (ESI): Exact mass calcd for  $\text{C}_{27}\text{H}_{19}\text{Br}_2\text{O}_2\text{P}$   $[\text{M}+\text{H}]^+$ : 564.9562, Found: 564.9562.

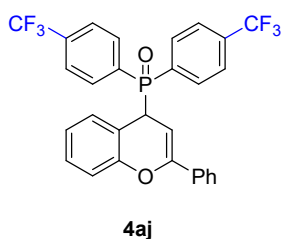

Column chromatography afforded the desired product **4aj** in 54% yield (88 mg) as white solid; Mp: 212-214 °C;  $^1\text{H}$  NMR (600 MHz,  $\text{CDCl}_3$ ):  $\delta = 7.87$ -7.81 (m, 4H), 7.76-7.75 (m, 2H), 7.64-7.62 (m, 2H), 7.49-7.47 (m, 2H), 7.37-7.36 (m, 3H), 7.22-7.19 (m, 1H), 7.13 (d,  $J = 7.8$  Hz, 1H), 7.00-6.98 (m, 1H), 6.90 (d,  $J = 8.4$  Hz, 1H), 5.38 (dd,  $J = 5.4$  Hz, 3.0 Hz, 1H), 4.72 (dd,  $J = 20.4$  Hz, 5.4 Hz, 1H);  $^{13}\text{C}\{^1\text{H}\}$  NMR (150 MHz,  $\text{CDCl}_3$ ):  $\delta = 151.99$  (d,  $J_{C-F} = 12.0$  Hz), 151.97, 134.6, 134.12 (qd,  $J_{C-F} = 18.0$  Hz,  $J_{C-P} = 3.0$  Hz), 134.08 (d,  $J_{C-F} = 12.0$  Hz), 133.5, 133.0 (d,  $J_{C-P} = 3.0$  Hz), 132.52 (d,  $J_{C-P} = 4.5$  Hz), 132.46 (d,  $J_{C-P} = 6.0$  Hz), 129.6 (d,  $J_{C-P} = 3.0$  Hz), 129.4, 129.2 (d,  $J_{C-P} = 3.0$  Hz), 128.5, 125.5 (dq,  $J_{C-P} = 12.0$  Hz,  $J_{C-F} = 3.0$  Hz), 125.2 (dq,  $J_{C-P} = 12.0$  Hz,  $J_{C-F} = 3.0$  Hz), 124.7, 124.0 (d,  $J_{C-P} = 3.0$  Hz), 123.4 (q,  $J_{C-F} = 271.5$  Hz), 116.8 (d,  $J_{C-P} = 1.5$  Hz), 115.0 (d,  $J_{C-P} = 4.5$  Hz), 91.6 (d,  $J_{C-P} = 7.5$  Hz), 40.7 (d,  $J_{C-P} = 69.0$  Hz);  $^{31}\text{P}\{^1\text{H}\}$  NMR (243 MHz,  $\text{CDCl}_3$ ):  $\delta = 28.0$ ;  $^{19}\text{F}\{^1\text{H}\}$  NMR (564 MHz,  $\text{CDCl}_3$ ):  $\delta = -63.20$  (3F), -62.23 (3F); HRMS (ESI): Exact mass calcd for  $\text{C}_{29}\text{H}_{19}\text{F}_6\text{O}_2\text{P}$   $[\text{M}+\text{H}]^+$ : 545.1100, Found: 545.1099.

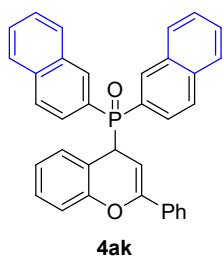

Column chromatography afforded the desired product **4ak** in 57% yield (85 mg) as



yellow solid; Mp: 84-86 °C; <sup>1</sup>H NMR (600 MHz, CDCl<sub>3</sub>): δ = 8.75 (d, *J* = 8.4 Hz, 1H), 8.62 (d, *J* = 8.4 Hz, 1H), 8.04 (m, *J* = 8.4 Hz, 1H), 7.91-7.89 (m, 2H), 7.84-7.78 (m, 2H), 7.67-7.63 (m, 1H), 7.49-7.47 (m, 2H), 7.41-7.38 (m, 2H), 7.33-7.29 (m, 3H), 7.26-7.24 (m, 4H), 7.22-7.20 (m, 1H), 7.11 (t, *J* = 7.8 Hz, 1H), 6.90-6.88 (m, 1H), 6.78 (d, *J* = 8.4 Hz, 1H), 5.38-5.37 (m, 1H), 5.13 (dd, *J* = 21.0 Hz, 5.4 Hz, 1H); <sup>13</sup>C{<sup>1</sup>H} NMR (150 MHz, CDCl<sub>3</sub>): δ = 152.0 (d, *J*<sub>C-P</sub> = 4.5 Hz), 150.9 (d, *J*<sub>C-P</sub> = 9.0 Hz), 134.5 (d, *J*<sub>C-P</sub> = 7.5 Hz), 134.1 (d, *J*<sub>C-P</sub> = 9.0 Hz), 134.0 (d, *J*<sub>C-P</sub> = 7.5 Hz), 133.8 (d, *J*<sub>C-P</sub> = 9.0 Hz), 133.5 (d, *J*<sub>C-P</sub> = 3.0 Hz), 133.2 (d, *J*<sub>C-P</sub> = 3.0 Hz), 133.0 (d, *J*<sub>C-P</sub> = 1.5 Hz), 132.4 (d, *J*<sub>C-P</sub> = 10.5 Hz), 131.6 (d, *J*<sub>C-P</sub> = 10.5 Hz), 130.3 (d, *J*<sub>C-P</sub> = 3.0 Hz), 128.8 (d, *J*<sub>C-P</sub> = 12.0 Hz), 128.6 (d, *J*<sub>C-P</sub> = 1.5 Hz), 128.5, 128.3 (d, *J*<sub>C-P</sub> = 91.5 Hz), 128.1, 127.4, 127.3 (d, *J*<sub>C-P</sub> = 4.5 Hz), 126.7 (d, *J*<sub>C-P</sub> = 67.5 Hz), 126.4 (d, *J*<sub>C-P</sub> = 91.5 Hz), 126.1, 116.3 (d, *J*<sub>C-P</sub> = 1.5 Hz), 116.2 (d, *J*<sub>C-P</sub> = 4.5 Hz), 93.9 (d, *J*<sub>C-P</sub> = 6.0 Hz), 41.2 (d, *J*<sub>C-P</sub> = 67.5 Hz); <sup>31</sup>P{<sup>1</sup>H} NMR (243 MHz, CDCl<sub>3</sub>): δ = 38.5; HRMS (ESI): Exact mass calcd for C<sub>35</sub>H<sub>25</sub>O<sub>2</sub>P [M+H]<sup>+</sup>: 509.1665, Found: 509.1666.

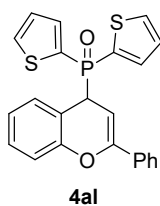

Column chromatography afforded the desired product **4al** in 79% yield (100 mg) as red solid; Mp: 194-196 °C; <sup>1</sup>H NMR (600 MHz, CDCl<sub>3</sub>): δ = 7.80-7.79 (m, 1H), 7.67-7.63 (m, 2H), 7.60-7.59 (m, 2H), 7.51-7.49 (m, 1H), 7.39-7.36 (m, 3H), 7.31-7.30 (m, 1H), 7.25-7.23 (m, 1H), 7.22-7.19 (m, 1H), 7.091-7.086 (m, 1H), 7.05-7.02 (m, 1H), 6.91 (d, *J* = 8.4 Hz, 1H), 5.45 (dd, *J* = 4.8 Hz, 3.6 Hz, 1H), 4.54 (dd, *J* = 22.8 Hz, 5.4 Hz, 1H); <sup>13</sup>C{<sup>1</sup>H} NMR (150 MHz, CDCl<sub>3</sub>): δ = 151.9 (d, *J*<sub>C-P</sub> = 4.5 Hz), 151.8 (d, *J*<sub>C-P</sub> = 10.5 Hz), 137.3 (d, *J*<sub>C-P</sub> = 9.0 Hz), 136.9 (d, *J*<sub>C-P</sub> = 9.0 Hz), 134.4 (d, *J*<sub>C-P</sub> = 4.5 Hz), 134.1 (d, *J*<sub>C-P</sub> = 4.5 Hz), 133.6 (d, *J*<sub>C-P</sub> = 3.0 Hz), 130.9 (d, *J*<sub>C-P</sub> = 106.5 Hz), 130.0 (d, *J*<sub>C-P</sub> = 3.0 Hz), 129.7 (d, *J*<sub>C-P</sub> = 106.5 Hz), 129.1, 129.0 (d, *J*<sub>C-P</sub> = 3.0 Hz), 128.4, 128.3 (d, *J*<sub>C-P</sub> = 15.0 Hz), 128.0 (d, *J*<sub>C-P</sub> = 13.5 Hz), 125.0, 123.8 (d, *J*<sub>C-P</sub> = 3.0 Hz), 116.5 (d, *J*<sub>C-P</sub> = 3.0 Hz), 115.4 (d, *J*<sub>C-P</sub> = 4.5 Hz), 91.7 (d, *J*<sub>C-P</sub> = 7.5 Hz), 43.0 (d, *J*<sub>C-P</sub> = 76.5 Hz); <sup>31</sup>P{<sup>1</sup>H} NMR (243 MHz, CDCl<sub>3</sub>): δ = 21.3; HRMS (ESI): Exact mass calcd for C<sub>23</sub>H<sub>17</sub>O<sub>2</sub>PS<sub>2</sub> [M+H]<sup>+</sup>: 421.0480, Found: 421.0475.

#### 4. Scaled synthesis and product elaboration

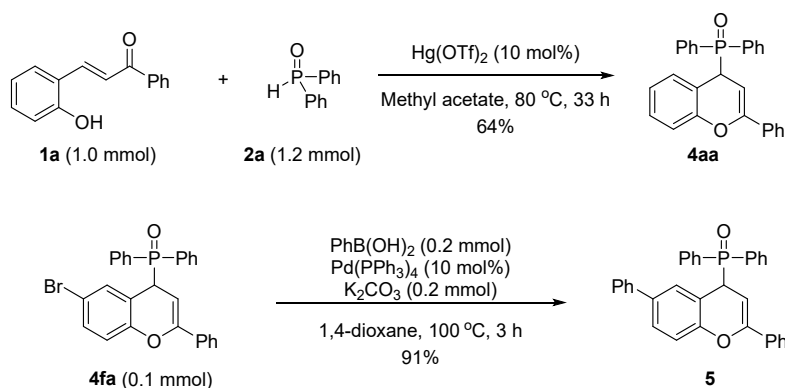

#### 4.1 Scaled synthesis

To a 35-mL sealed tube were added 2-hydroxychalcone **1a** (1.0 mmol, 224.2 mg, 1.0 equiv),  $\text{Ph}_2\text{P}(\text{O})\text{H}$  **2a** (1.2 mmol, 242.7 mg, 1.2 equivs) and 12.0 mL of anhydrous methyl acetate. After adding  $\text{Hg}(\text{OTf})_2$  (50.0 mg, 10 mol%), the reaction mixture was stirred at 80 °C till the almost full conversion of **1a** by TLC analysis and then further stirred for 24 hrs. The reaction mixture was cooled to room temperature and then directly subjected to column chromatography using dichloromethane/ethyl acetate (generally 40:1 to 5:1, v:v) as the eluent to afford the desired product **4aa** in 64% yield (0.26 g).

#### 4.2 Product elaboration

Compound **5** was prepared from **4fa** (60.1 mg, 0.1 mmol) and phenylboronic acid (24.4 mg, 0.2 mmol) according to the literature procedure.<sup>2</sup> Column chromatography afforded **5** in 91% yield (44 mg) as white solid. Mp: 193-195 °C;  $^1\text{H}$  NMR (600 MHz,  $\text{CDCl}_3$ ):  $\delta$  = 7.80-7.77 (m, 2H), 7.74-7.71 (m, 2H), 7.56-7.53 (m, 2H), 7.51-7.50 (m, 2H), 7.48-7.45 (m, 2H), 7.43-7.40 (m, 3H), 7.36-7.33 (m, 5H), 7.30-7.28 (m, 3H), 7.21 (s, 1H), 6.97 (d,  $J$  = 9.0 Hz, 1H), 5.47 (dd,  $J$  = 5.4 Hz, 3.6 Hz, 1H), 4.72 (dd,  $J$  = 19.2 Hz, 5.4 Hz, 1H);  $^{13}\text{C}$   $\{^1\text{H}\}$  NMR (150 MHz,  $\text{CDCl}_3$ ):  $\delta$  = 151.6 (d,  $J_{\text{C-P}}$  = 4.5 Hz), 151.2 (d,  $J_{\text{C-P}}$  = 9.0 Hz), 139.9, 136.3 (d,  $J_{\text{C-P}}$  = 3.0 Hz), 133.6 (d,  $J_{\text{C-P}}$  = 3.0 Hz), 132.14 (d,  $J_{\text{C-P}}$  = 7.5 Hz), 132.09, 132.06 (d,  $J_{\text{C-P}}$  = 4.5 Hz), 132.0 (d,  $J_{\text{C-P}}$  = 3.0 Hz), 130.4 (d,  $J_{\text{C-P}}$  = 94.5 Hz), 129.9 (d,  $J_{\text{C-P}}$  = 94.5 Hz), 128.9, 128.6 (d,  $J_{\text{C-P}}$  = 10.5 Hz), 128.4 (d,  $J_{\text{C-P}}$  = 12.0 Hz), 128.3, 128.1 (d,  $J_{\text{C-P}}$  = 3.0 Hz), 127.2 (d,  $J_{\text{C-P}}$  = 1.5 Hz), 127.0, 126.7, 124.8, 116.9 (d,  $J_{\text{C-P}}$  = 3.0 Hz), 116.3 (d,  $J_{\text{C-P}}$  = 4.5 Hz), 92.5 (d,  $J_{\text{C-P}}$  = 7.5 Hz), 40.8 (d,  $J_{\text{C-P}}$  = 67.5 Hz);  $^{31}\text{P}\{^1\text{H}\}$  NMR (243 MHz,  $\text{CDCl}_3$ ):  $\delta$  = 31.1; HRMS (ESI): Exact mass calcd for  $\text{C}_{33}\text{H}_{25}\text{O}_2\text{P}$   $[\text{M}+\text{H}]^+$ : 485.1665, Found: 485.1661.

#### 5. Mechanism investigation

<sup>2</sup> N. Eleya, A. Mahal, M. Hein, A. Villiger and P. Langer, *Adv. Synth. Catal.* 2011, **353**, 2761.

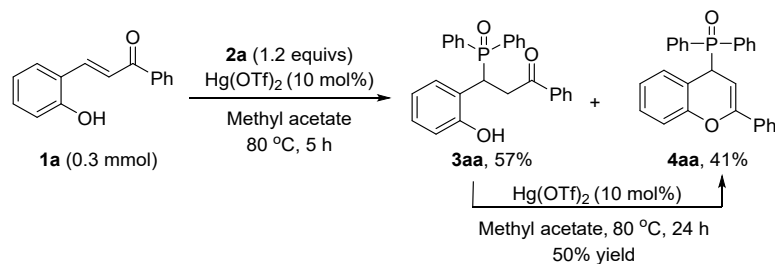

To a 35-mL sealed tube were added 2-hydroxychalcone **1a** (0.3 mmol, 67.2 mg, 1.0 equiv),  $\text{Ph}_2\text{P}(\text{O})\text{H}$  **2a** (0.36 mmol, 72.8 mg, 1.2 equivs) and 6.0 mL of anhydrous methyl acetate. After adding  $\text{Hg}(\text{OTf})_2$  (15.0 mg, 10 mol%), the reaction mixture was stirred at 80 °C till almost full conversion of **1a** by TLC analysis. The reaction mixture was cooled to room temperature and then directly subjected to column chromatography using dichloromethane/ethyl acetate (generally 40:1 to 5:1, v:v) as the eluent to afford the intermediate **3aa** (73 mg, 57% yield) and product **4aa** (51 mg, 41% yield). To a 35-mL sealed tube were added intermediate **3aa** (0.1 mmol, 42.6 mg, 1.0 equiv),  $\text{Hg}(\text{OTf})_2$  (5.0 mg, 10 mol%) and 3.0 mL of anhydrous methyl acetate. The reaction mixture was stirred at 80 °C for 24 hrs. The reaction mixture was cooled to room temperature and then directly subjected to column chromatography using dichloromethane/ethyl acetate (generally 40:1 to 5:1, v:v) as the eluent to afford the desired product **4aa** in 50% yield (0.21 g).

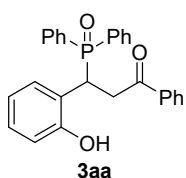

White solid; Mp: 181-183 °C;  $^1\text{H}$  NMR (600 MHz,  $\text{CDCl}_3$ ):  $\delta$  = 10.25 (brs, 1H), 7.97-7.93 (m, 2H), 7.83-7.81 (m, 2H), 7.66-7.63 (m, 2H), 7.54-7.50 (m, 3H), 7.49-7.47 (m, 1H), 7.41-7.39 (m, 1H), 7.36-7.31 (m, 4H), 7.03-7.01 (m, 2H), 6.92-6.91 (m, 1H), 6.64-6.62 (m, 1H), 4.56 (td,  $J$  = 9.0 Hz, 2.4 Hz, 1H), 4.30-4.25 (m, 1H), 3.31-3.26 (m, 1H);

$^{13}\text{C}\{^1\text{H}\}$  NMR (150 MHz,  $\text{CDCl}_3$ ):  $\delta$  = 196.8, 156.0, 136.2, 133.5, 133.1, 132.6 (d,  $J_{\text{C-P}}$  = 3.0 Hz), 132.1 (d,  $J_{\text{C-P}}$  = 3.0 Hz), 131.1 (d,  $J_{\text{C-P}}$  = 9.0 Hz), 130.8 (d,  $J_{\text{C-P}}$  = 9.0 Hz), 130.3 (d,  $J_{\text{C-P}}$  = 100.5 Hz), 129.5 (d,  $J_{\text{C-P}}$  = 100.5 Hz), 129.25, 129.18 (d,  $J_{\text{C-P}}$  = 12.0 Hz), 128.54, 128.53 (d,  $J_{\text{C-P}}$  = 12.0 Hz), 128.2, 122.7 (d,  $J_{\text{C-P}}$  = 6.0 Hz), 120.5, 120.0, 36.0;  $^{31}\text{P}\{^1\text{H}\}$  NMR (243 MHz,  $\text{CDCl}_3$ ):  $\delta$  = 42.2; HRMS (ESI): Exact mass calcd for  $\text{C}_{27}\text{H}_{23}\text{O}_3\text{P}$   $[\text{M}+\text{H}]^+$ : 427.1458, Found: 427.1455.

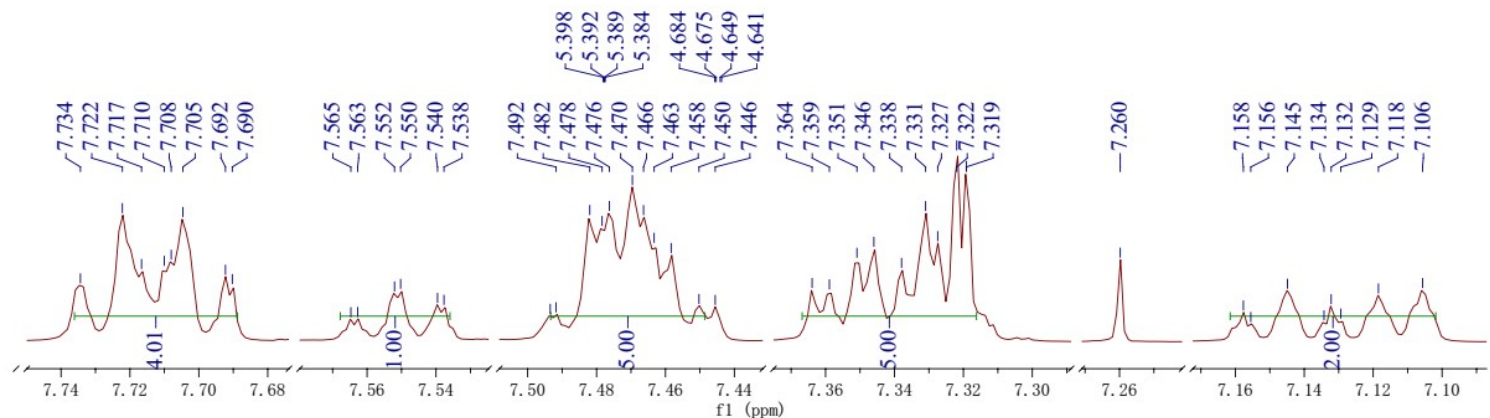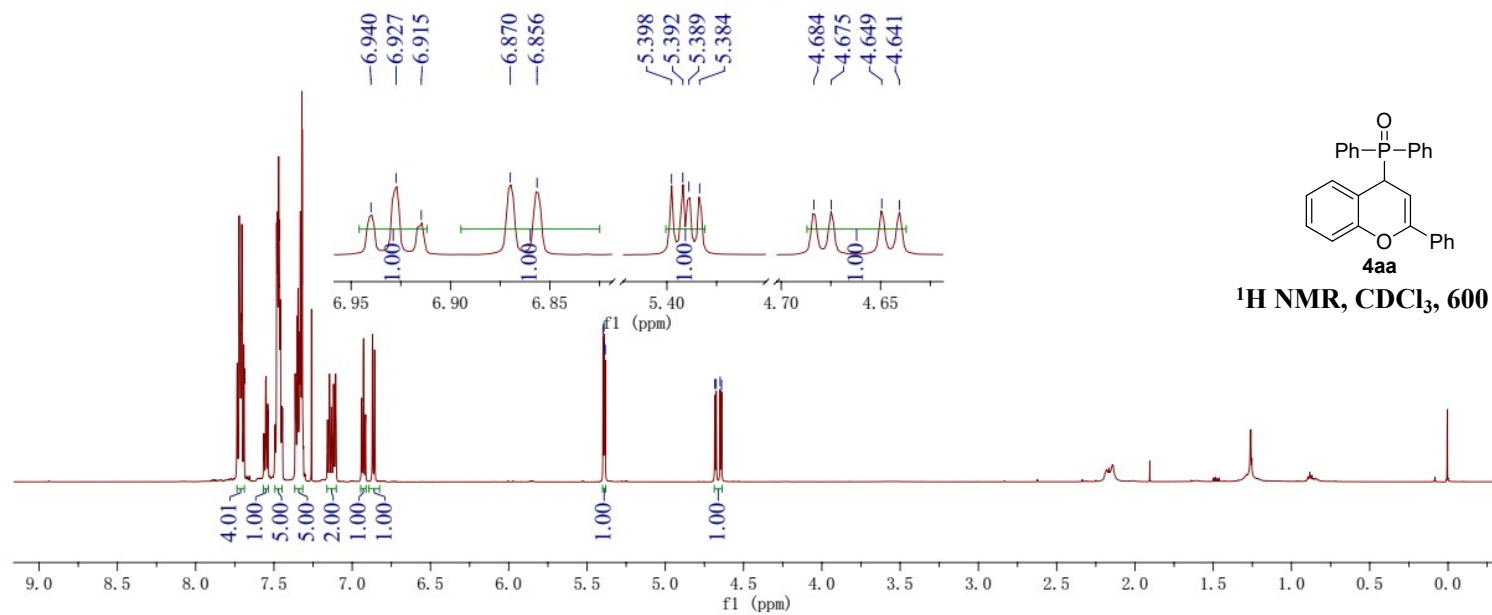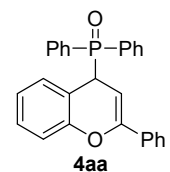

<sup>1</sup>H NMR, CDCl<sub>3</sub>, 600 MHz

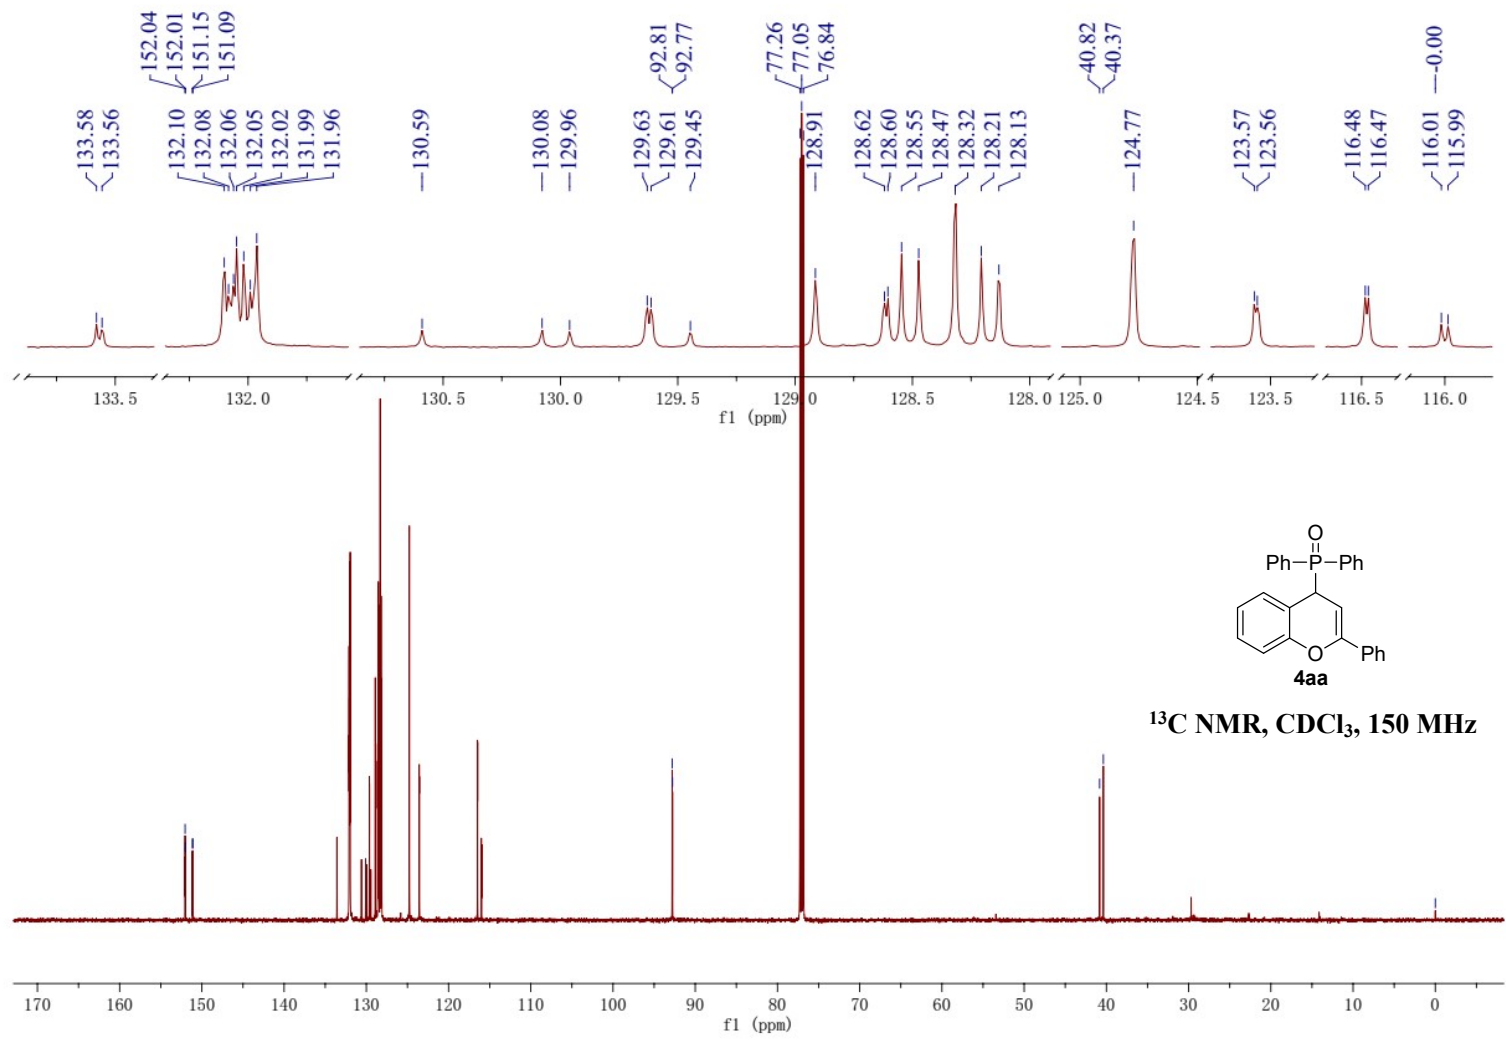

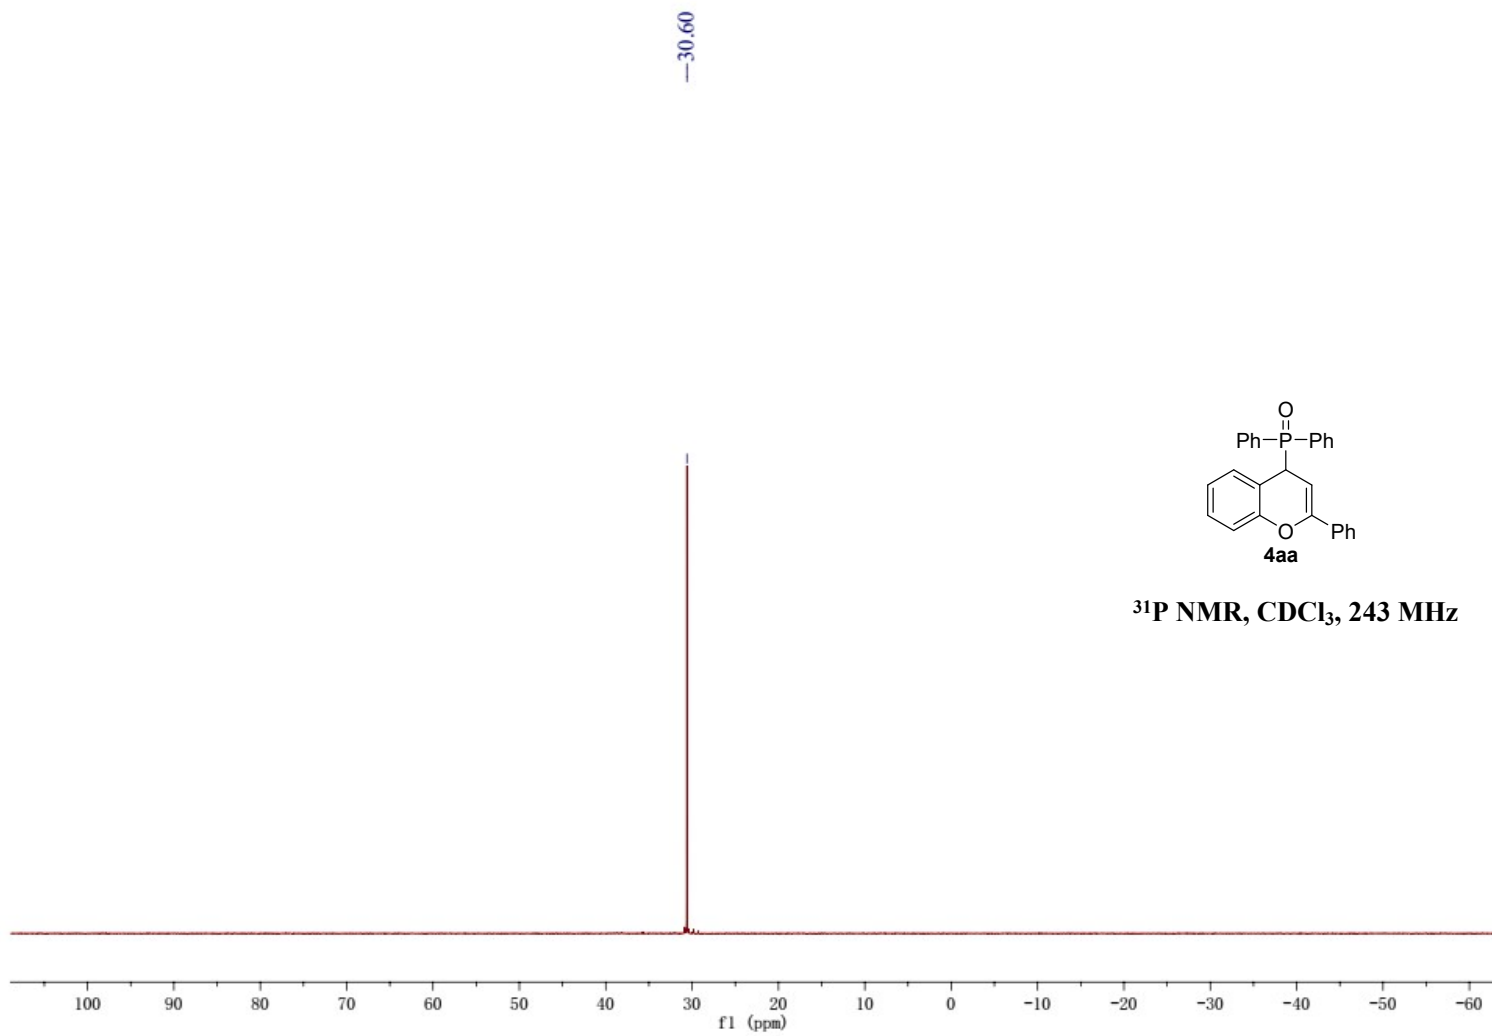

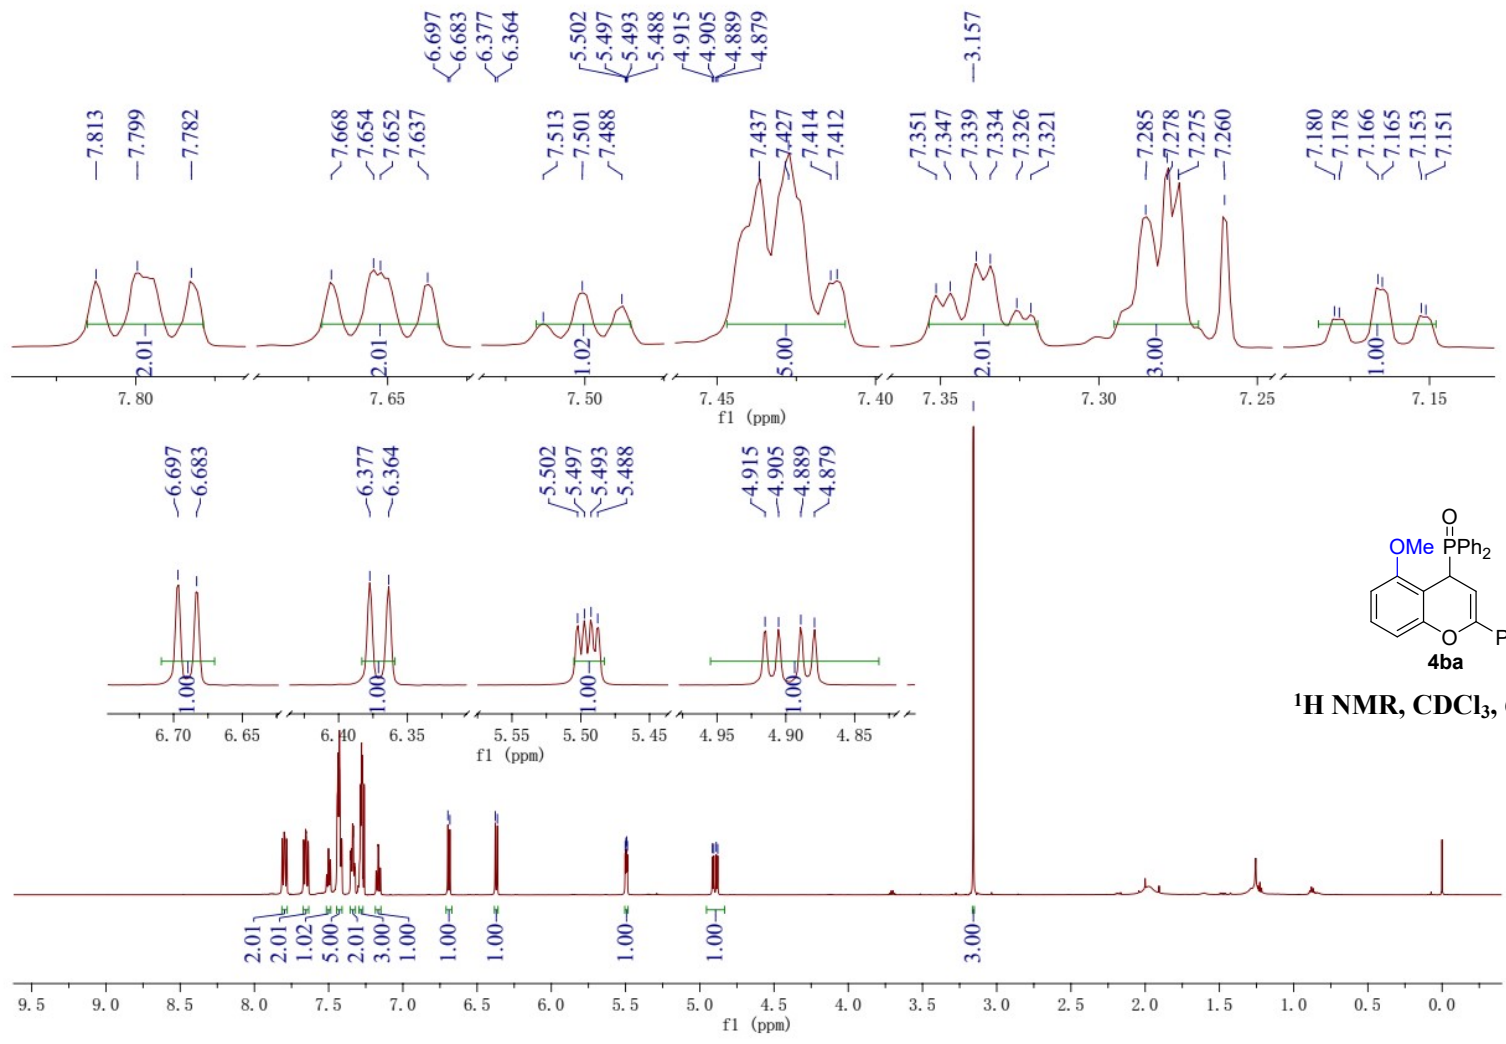

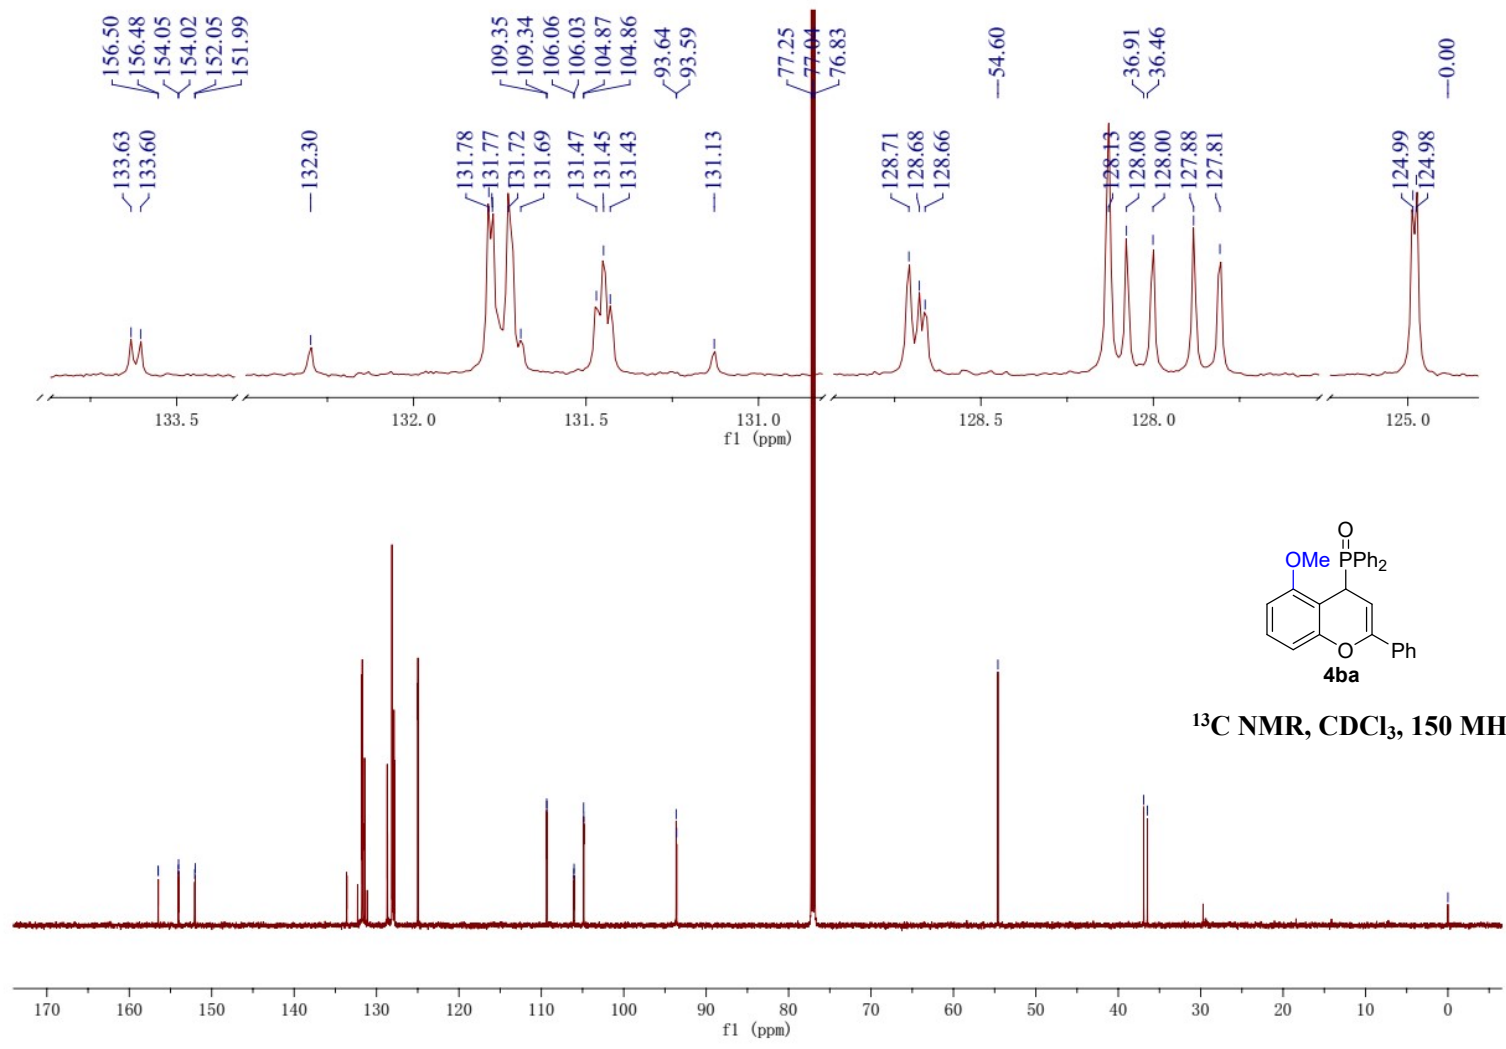



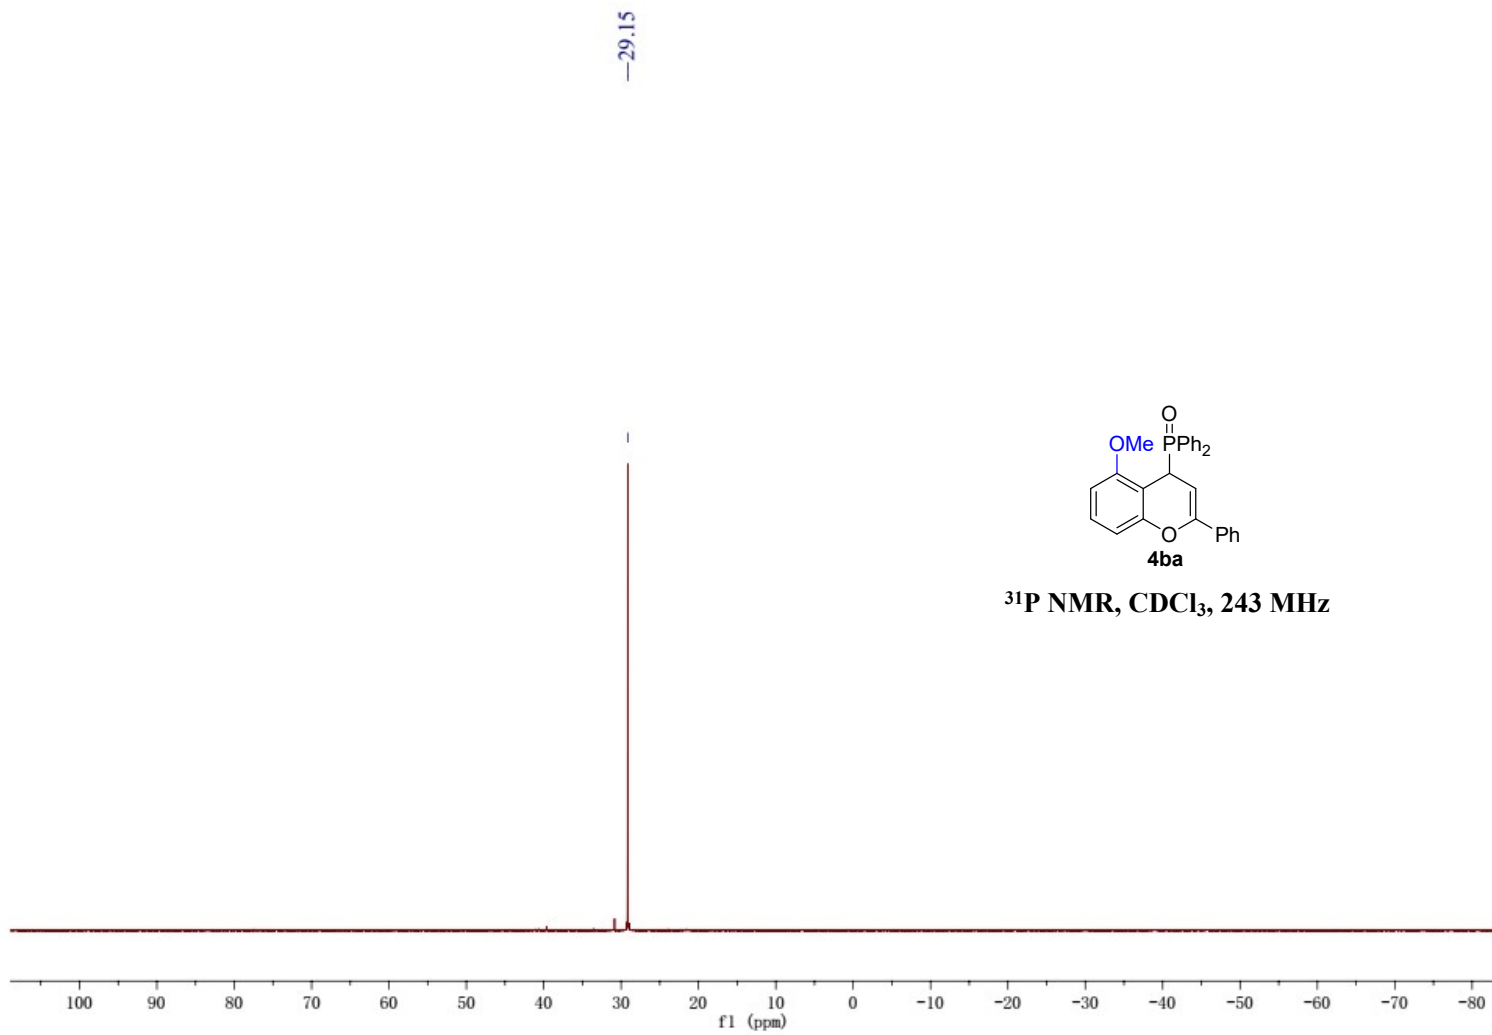

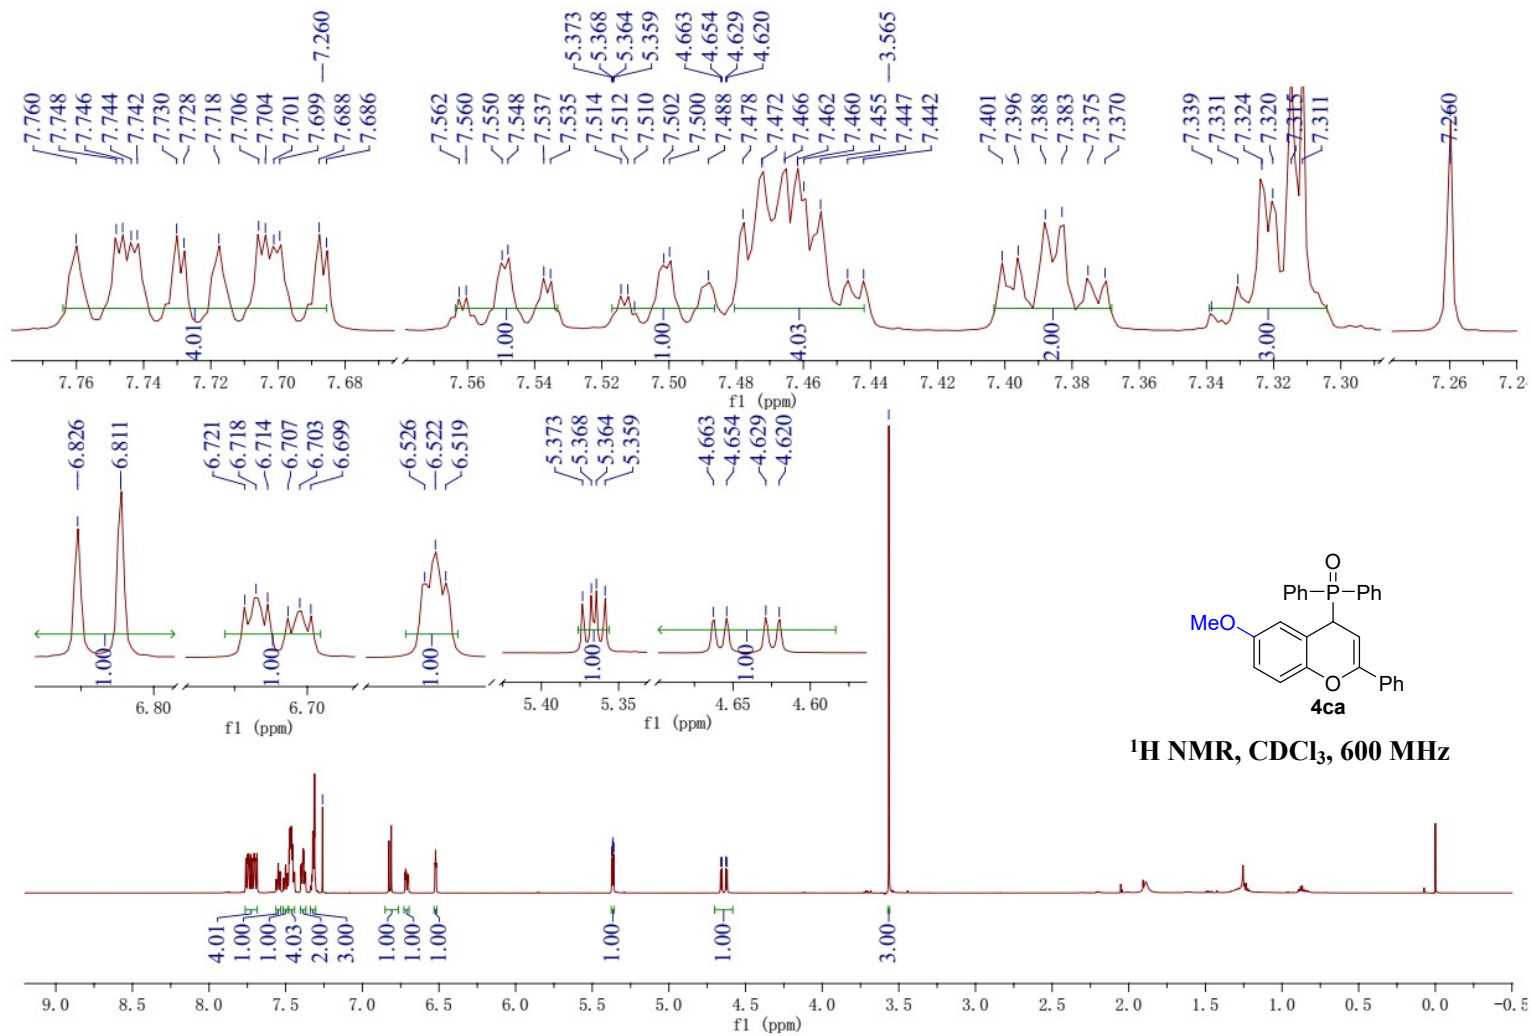



--30.53

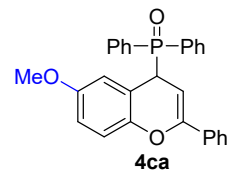

<sup>31</sup>P NMR, CDCl<sub>3</sub>, 243 MHz

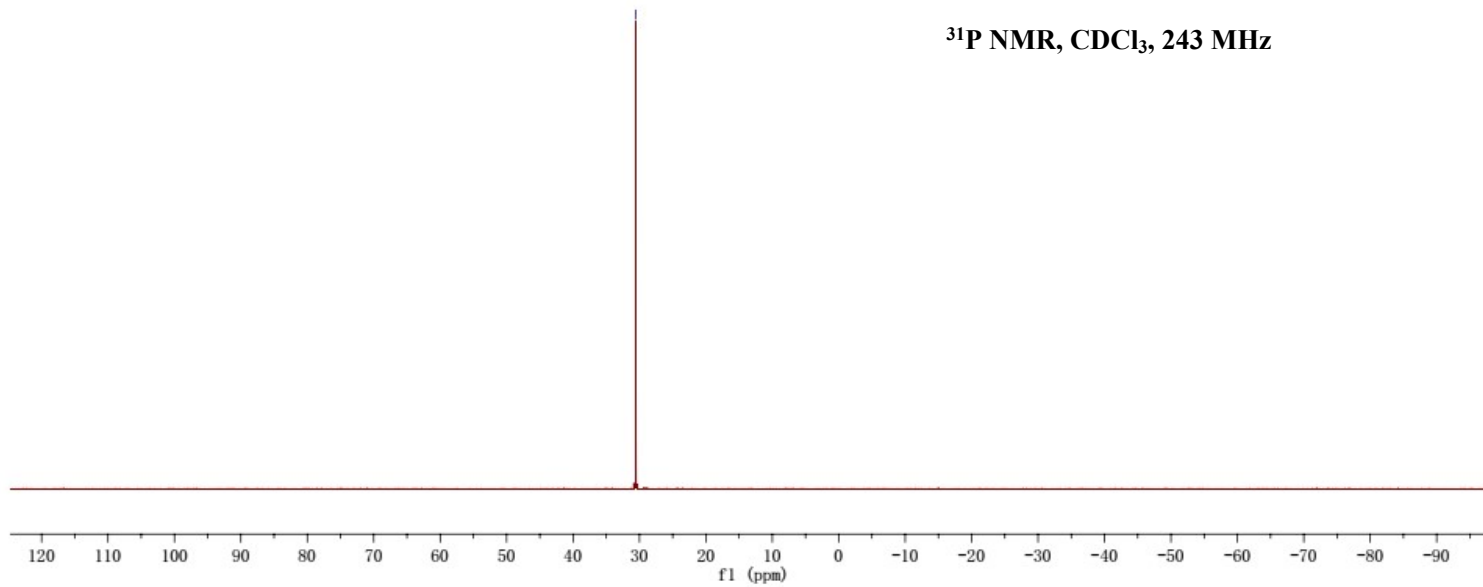

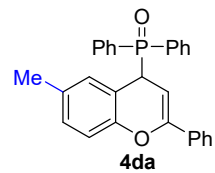

<sup>1</sup>H NMR, CDCl<sub>3</sub>, 600 MHz

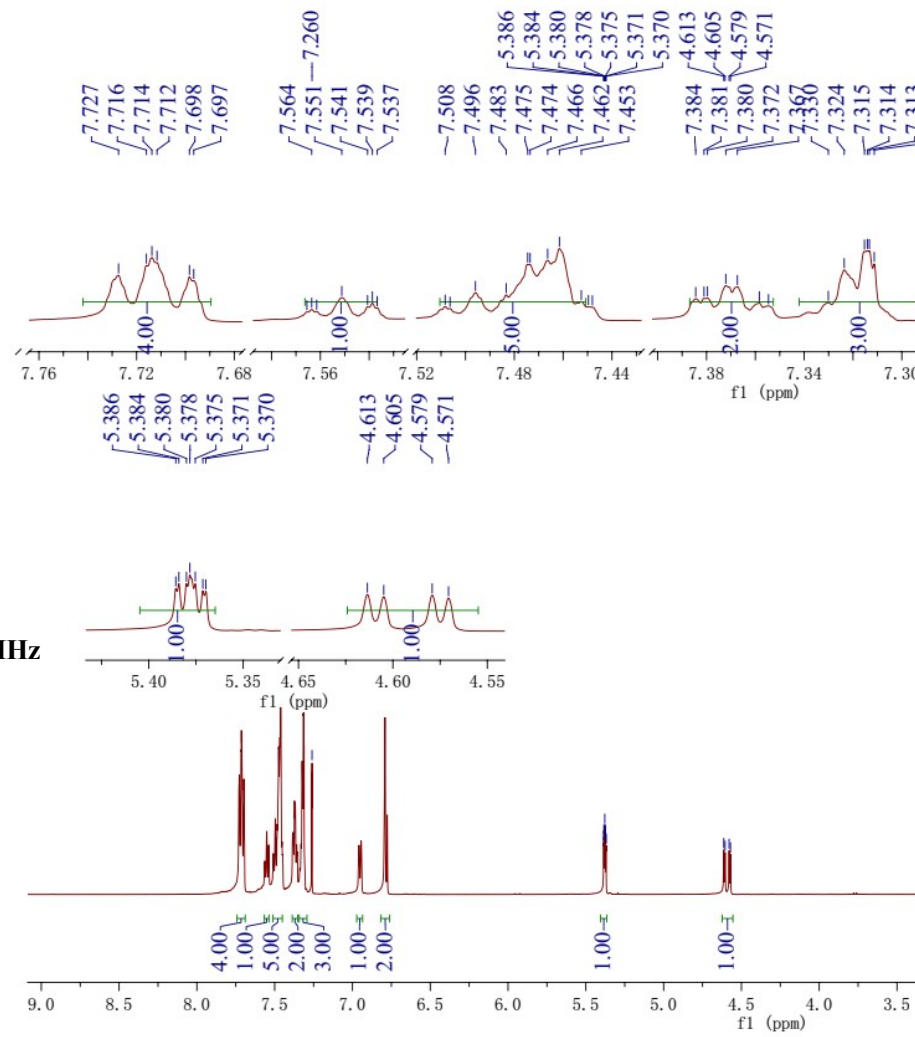

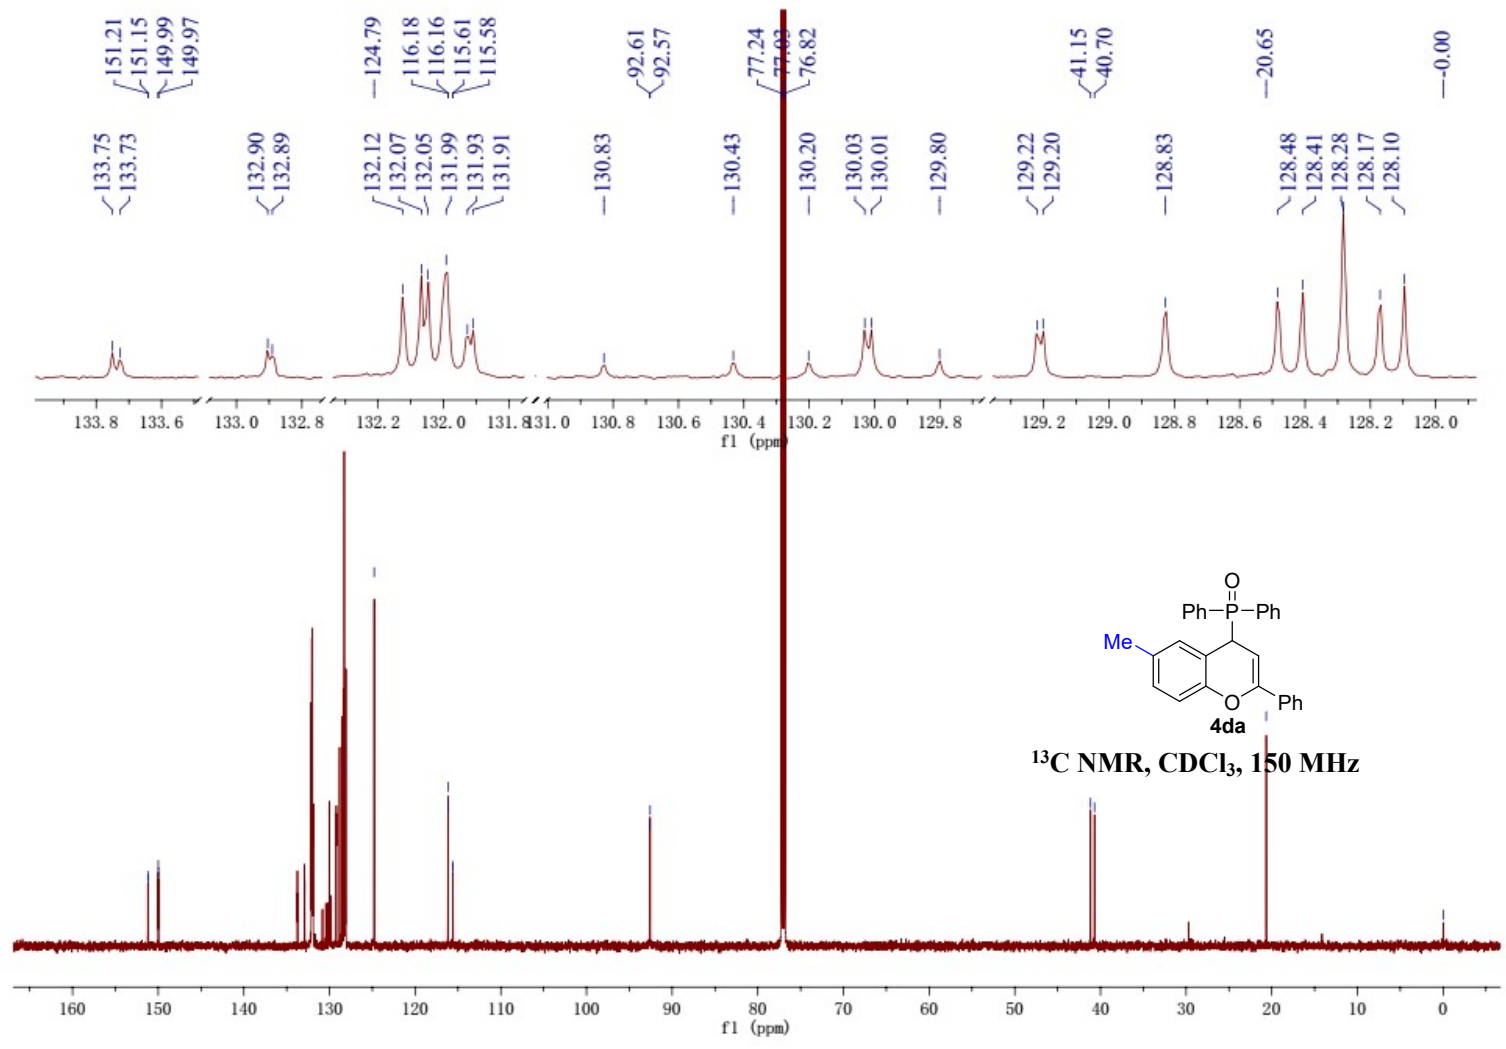

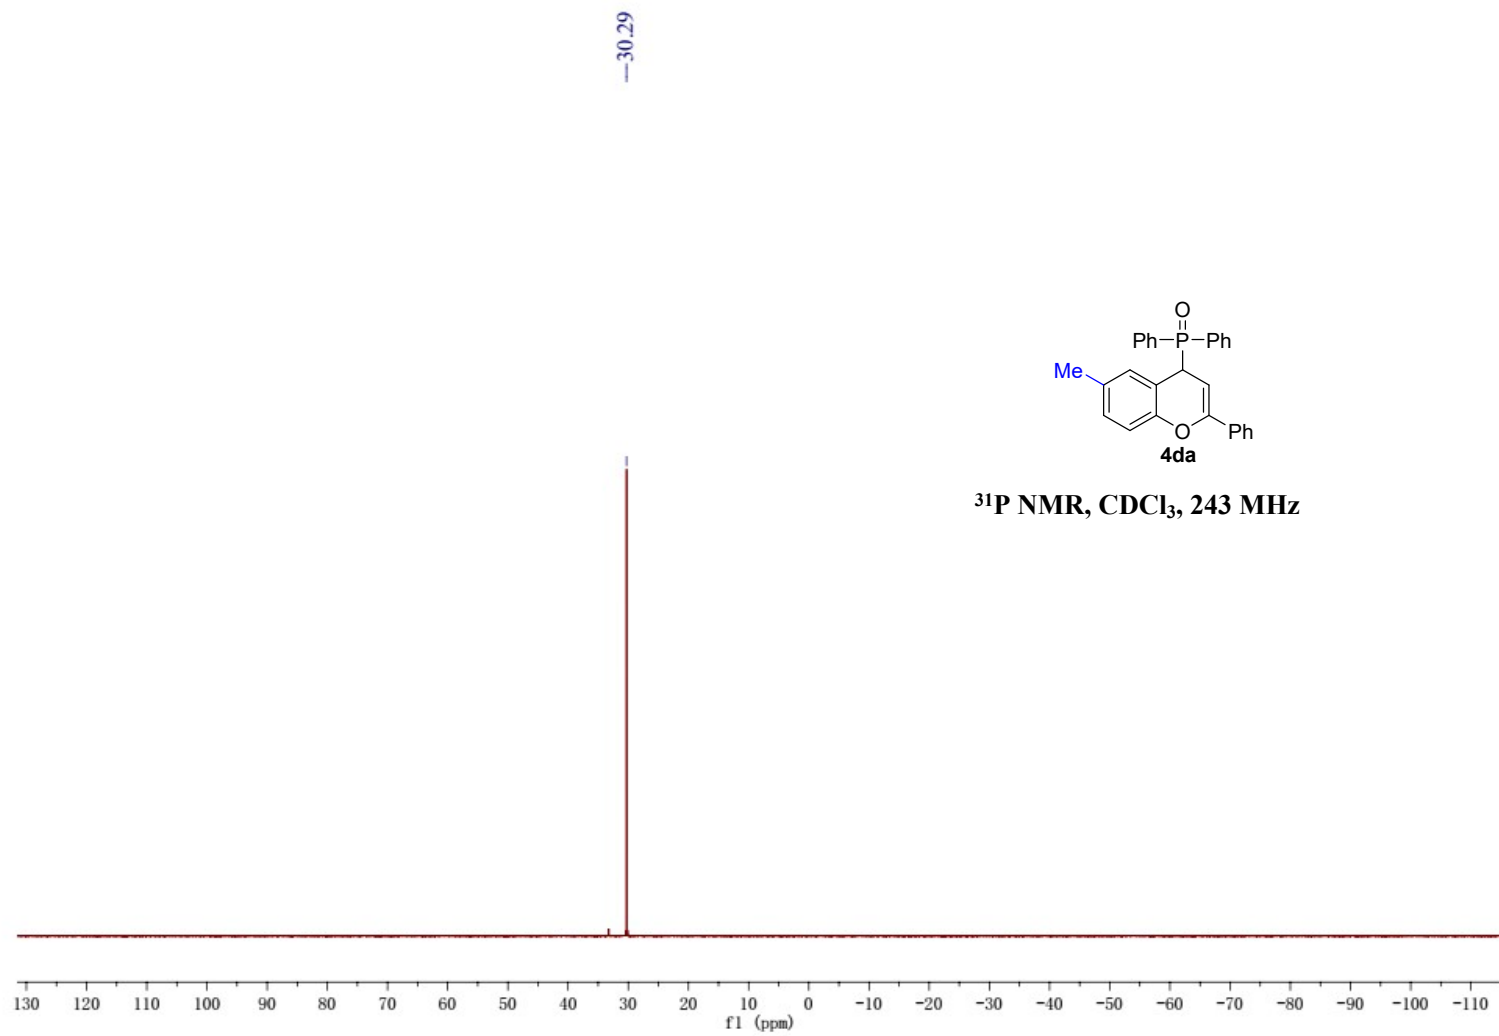

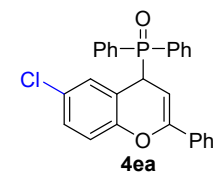

<sup>1</sup>H NMR, CDCl<sub>3</sub>, 600 MHz

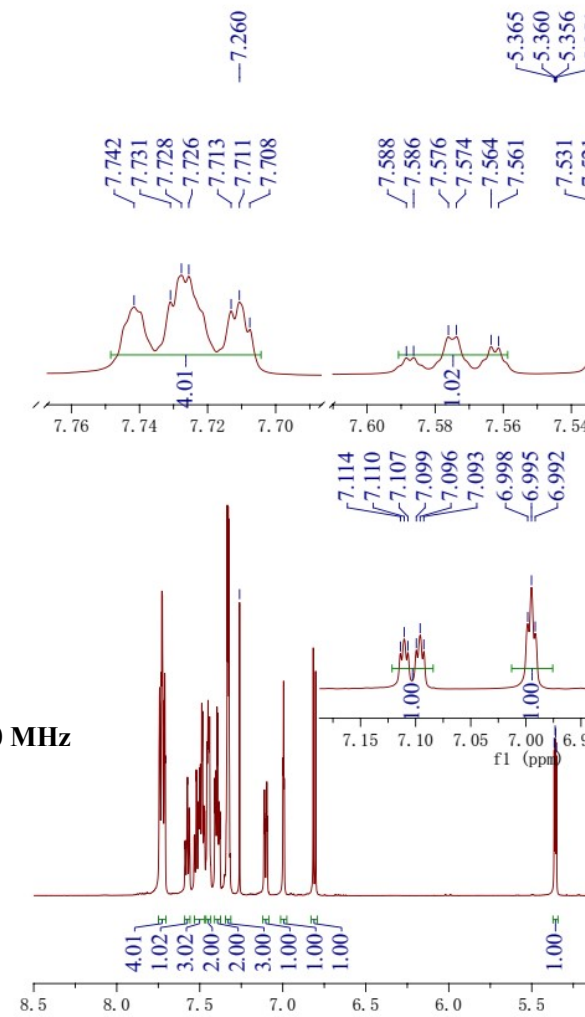



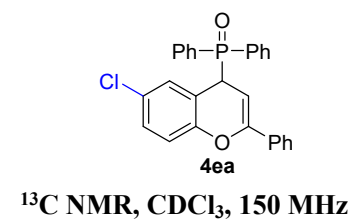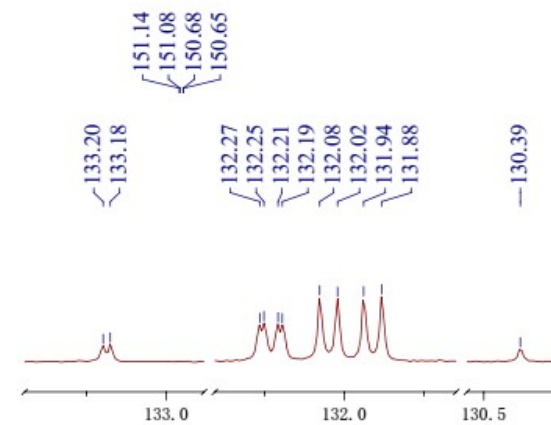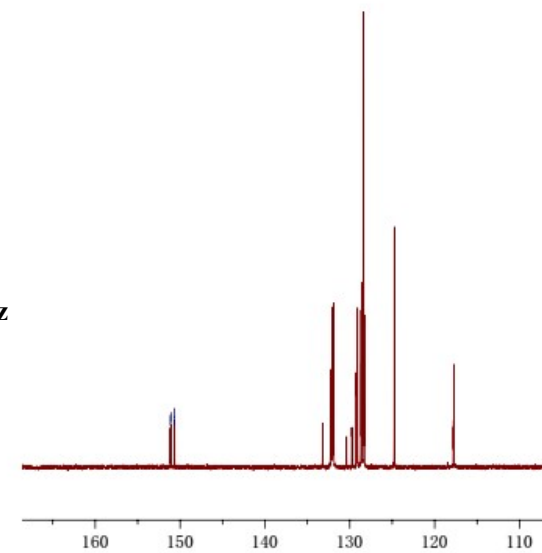

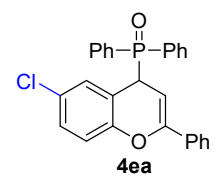

**<sup>31</sup>P NMR, CDCl<sub>3</sub>, 243 MHz**

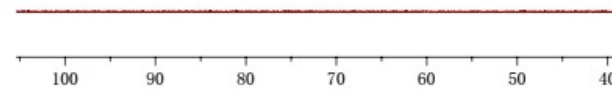

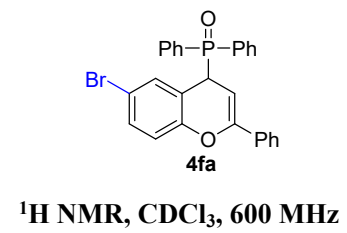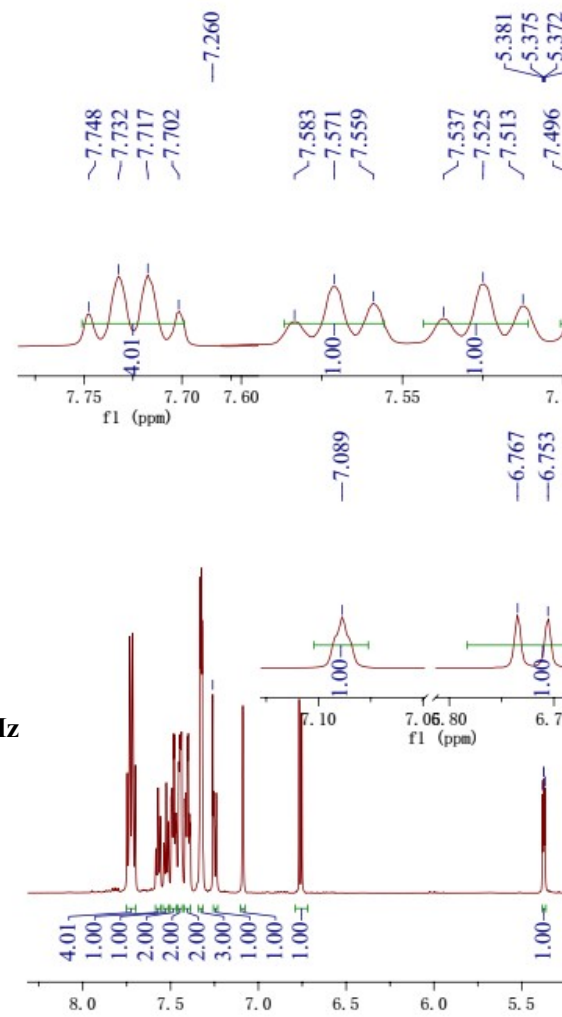

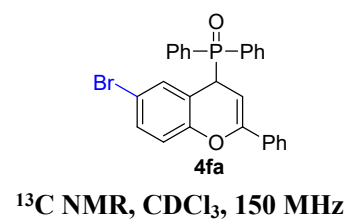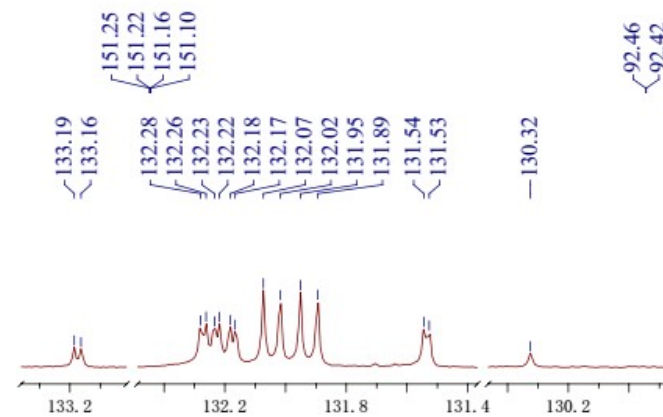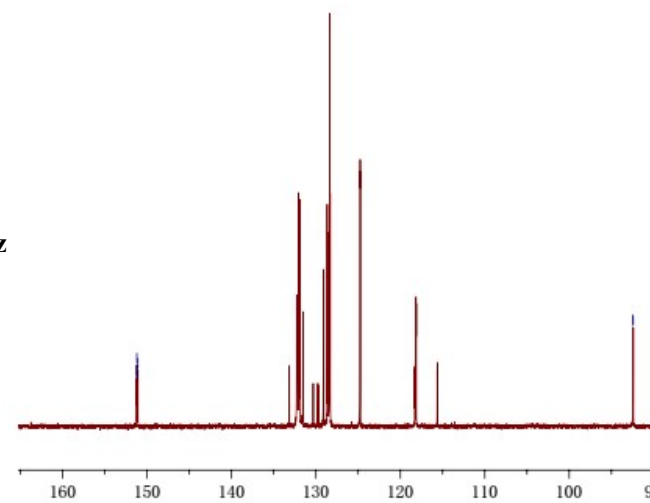

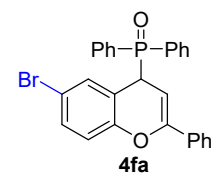

**<sup>31</sup>P NMR, CDCl<sub>3</sub>, 243 MHz**

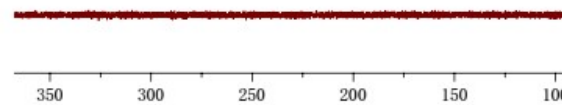

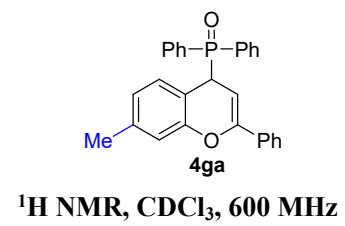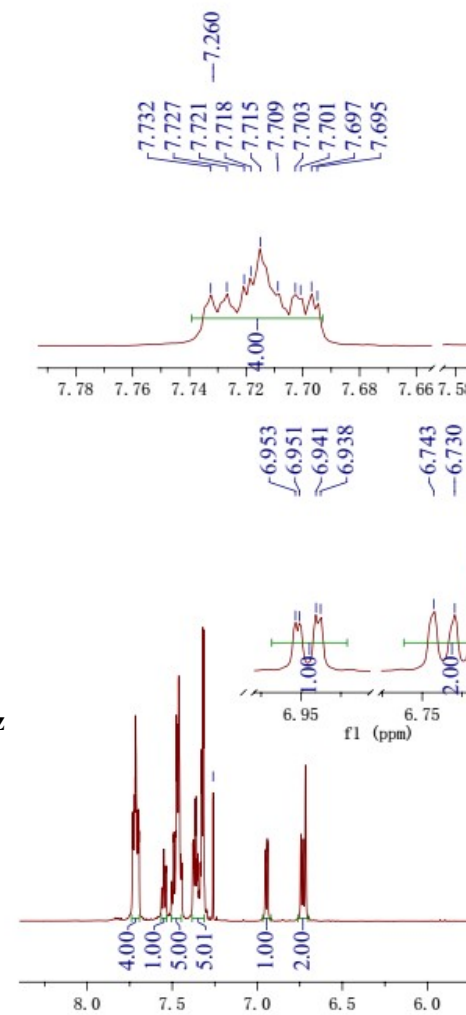

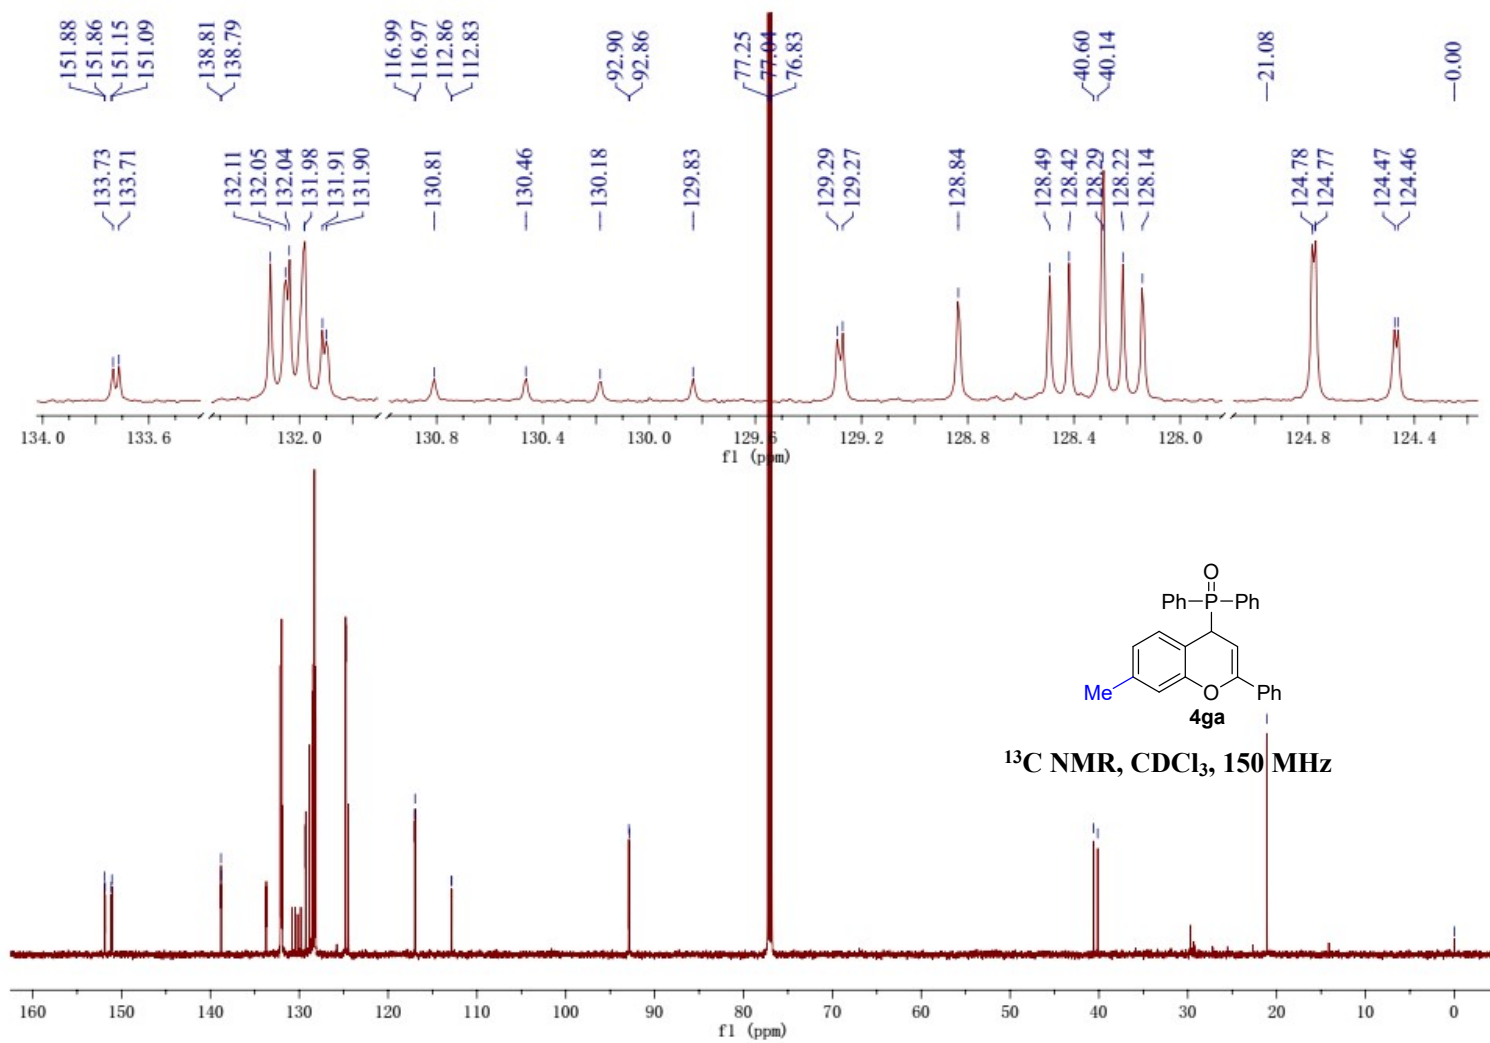

—30.31

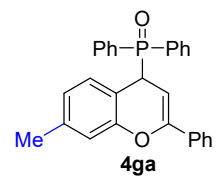

<sup>31</sup>P NMR, CDCl<sub>3</sub>, 243 MHz

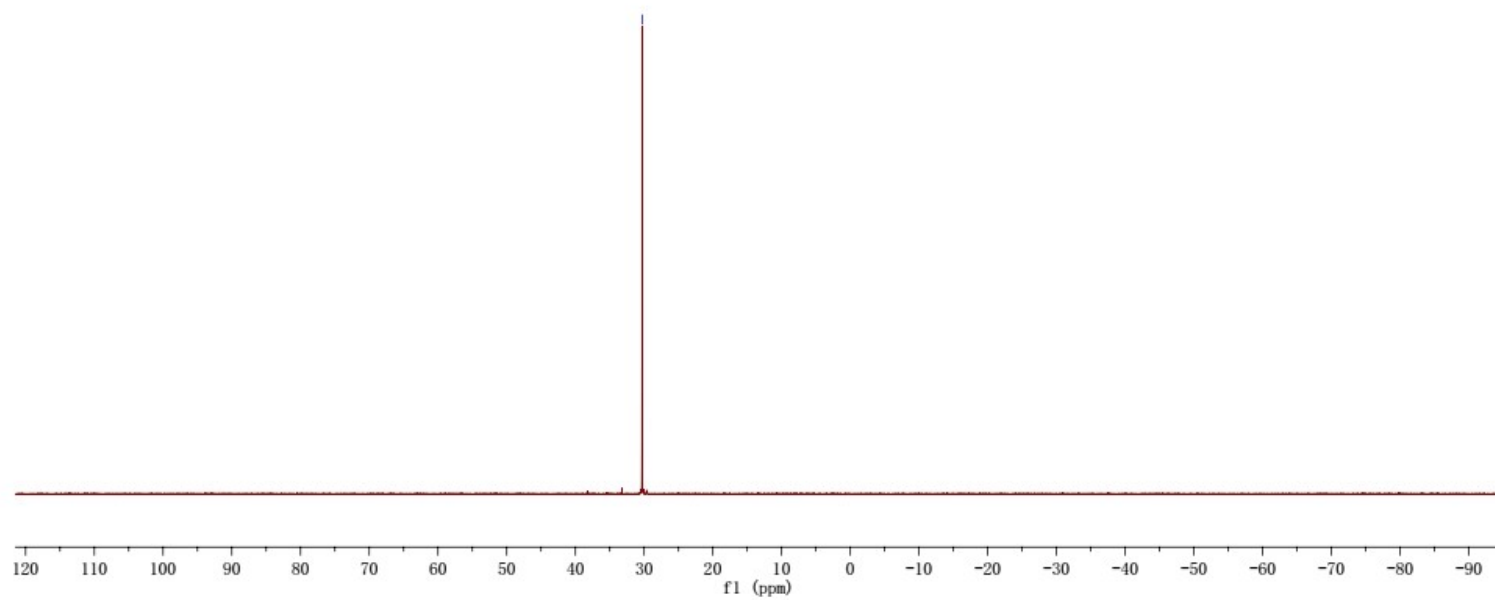



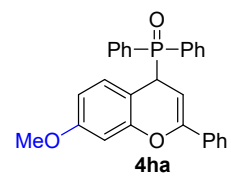

<sup>1</sup>H NMR, CDCl<sub>3</sub>, 600 MHz

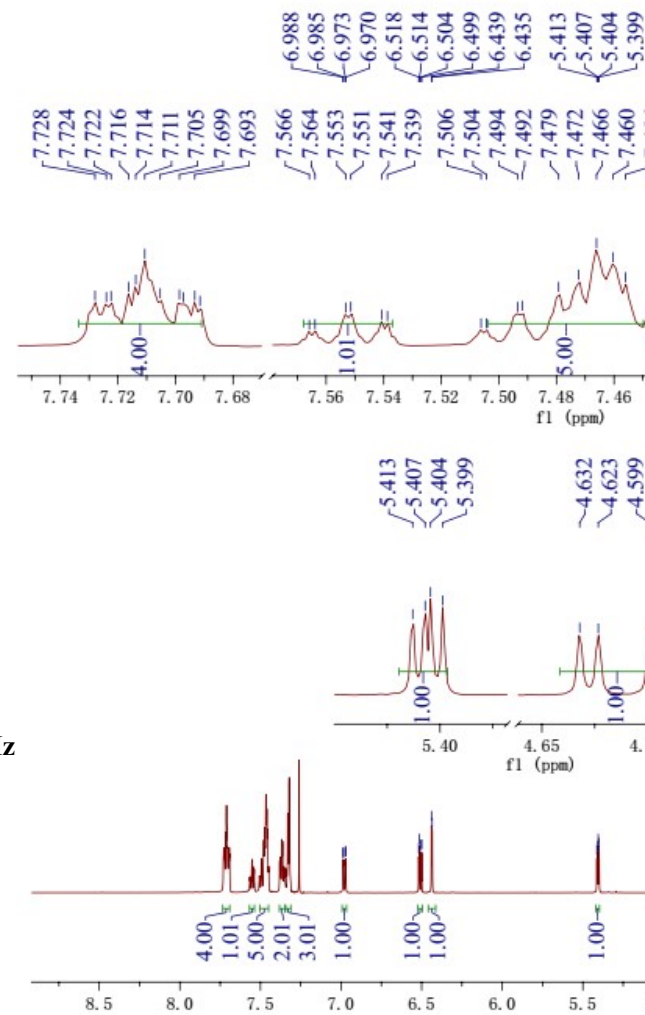

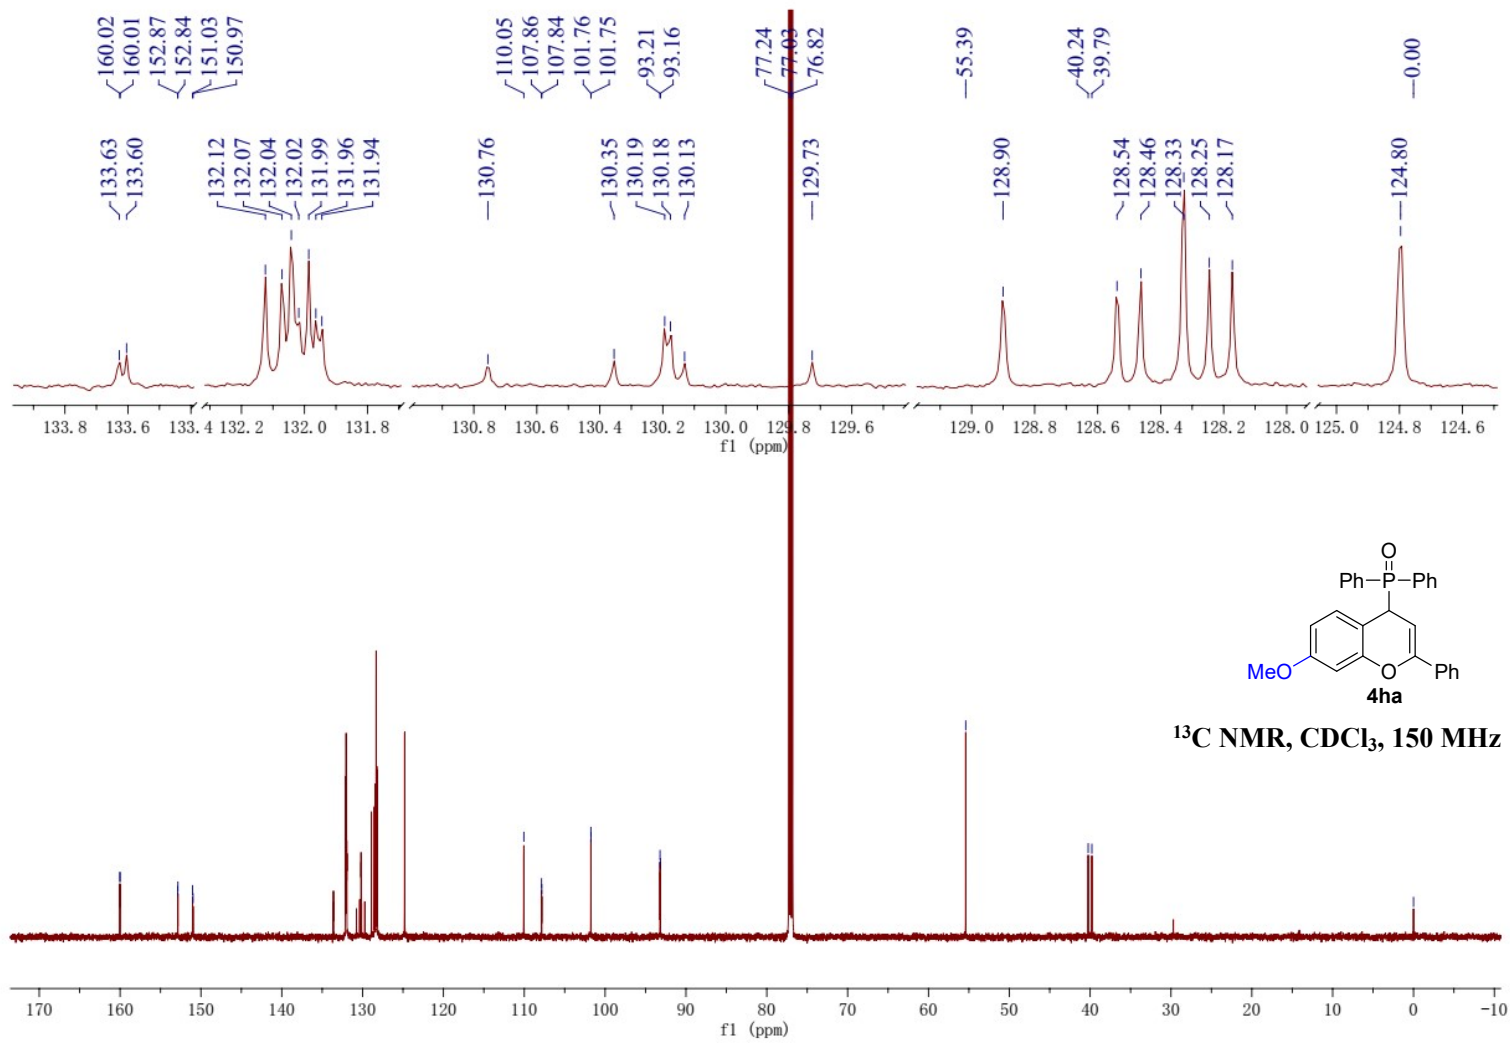

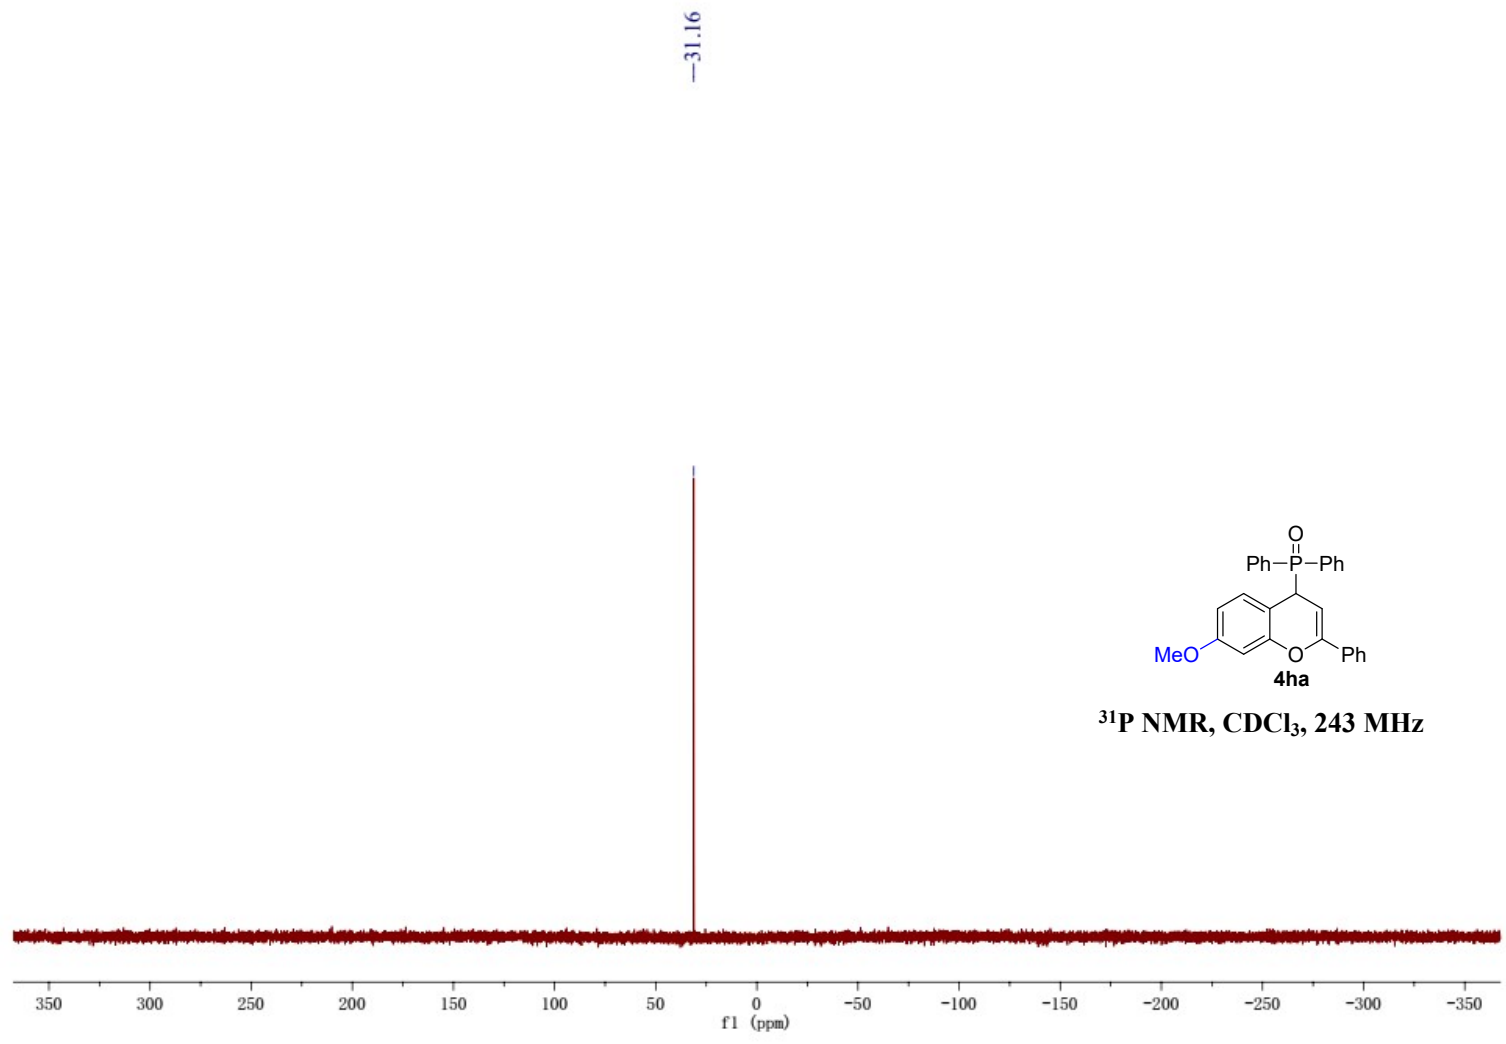

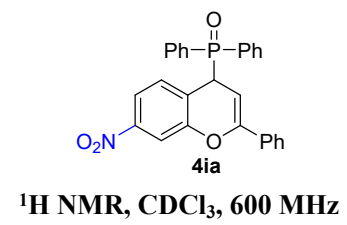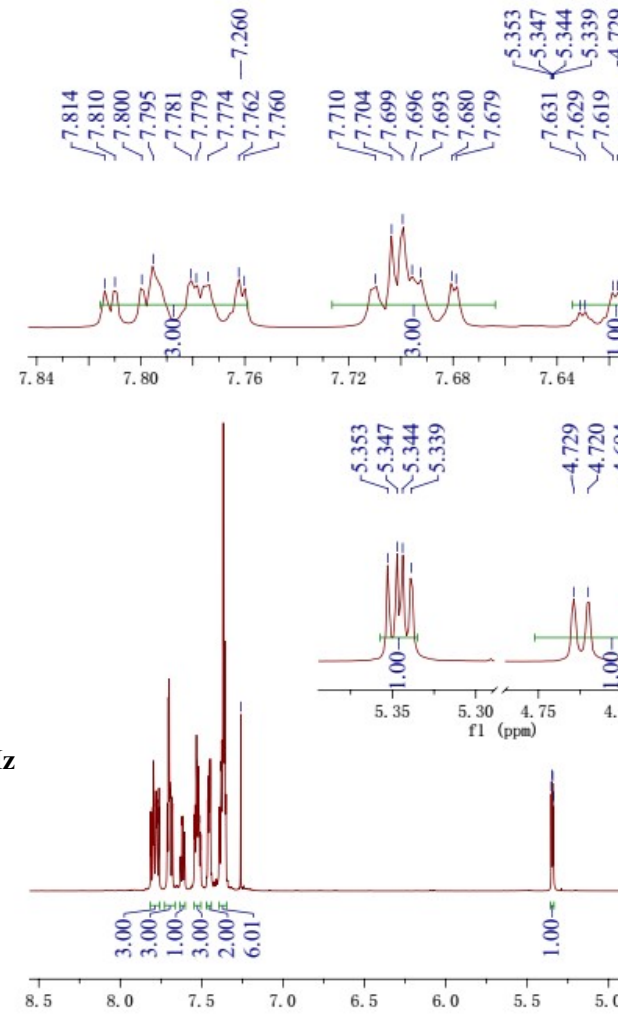

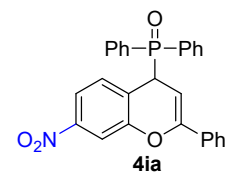

$^{13}\text{C}$  NMR,  $\text{CDCl}_3$ , 150 MHz

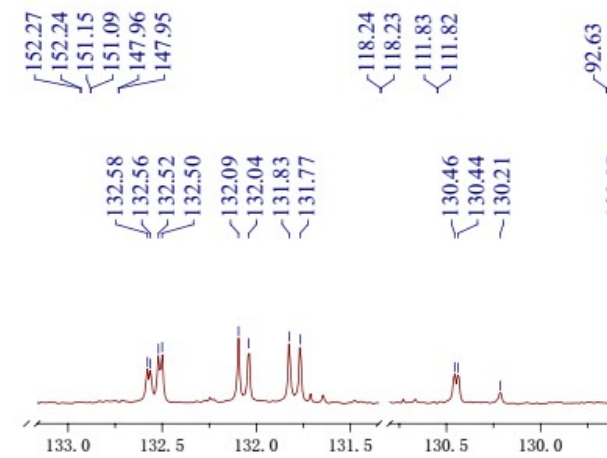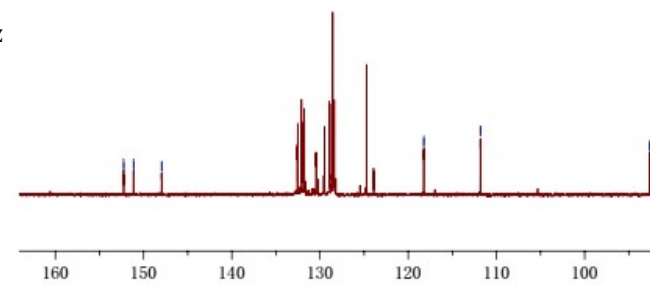

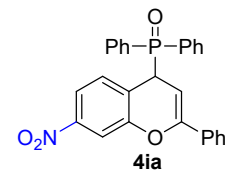

<sup>31</sup>P NMR, CDCl<sub>3</sub>, 243 MHz

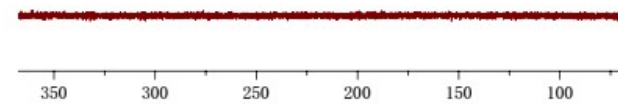

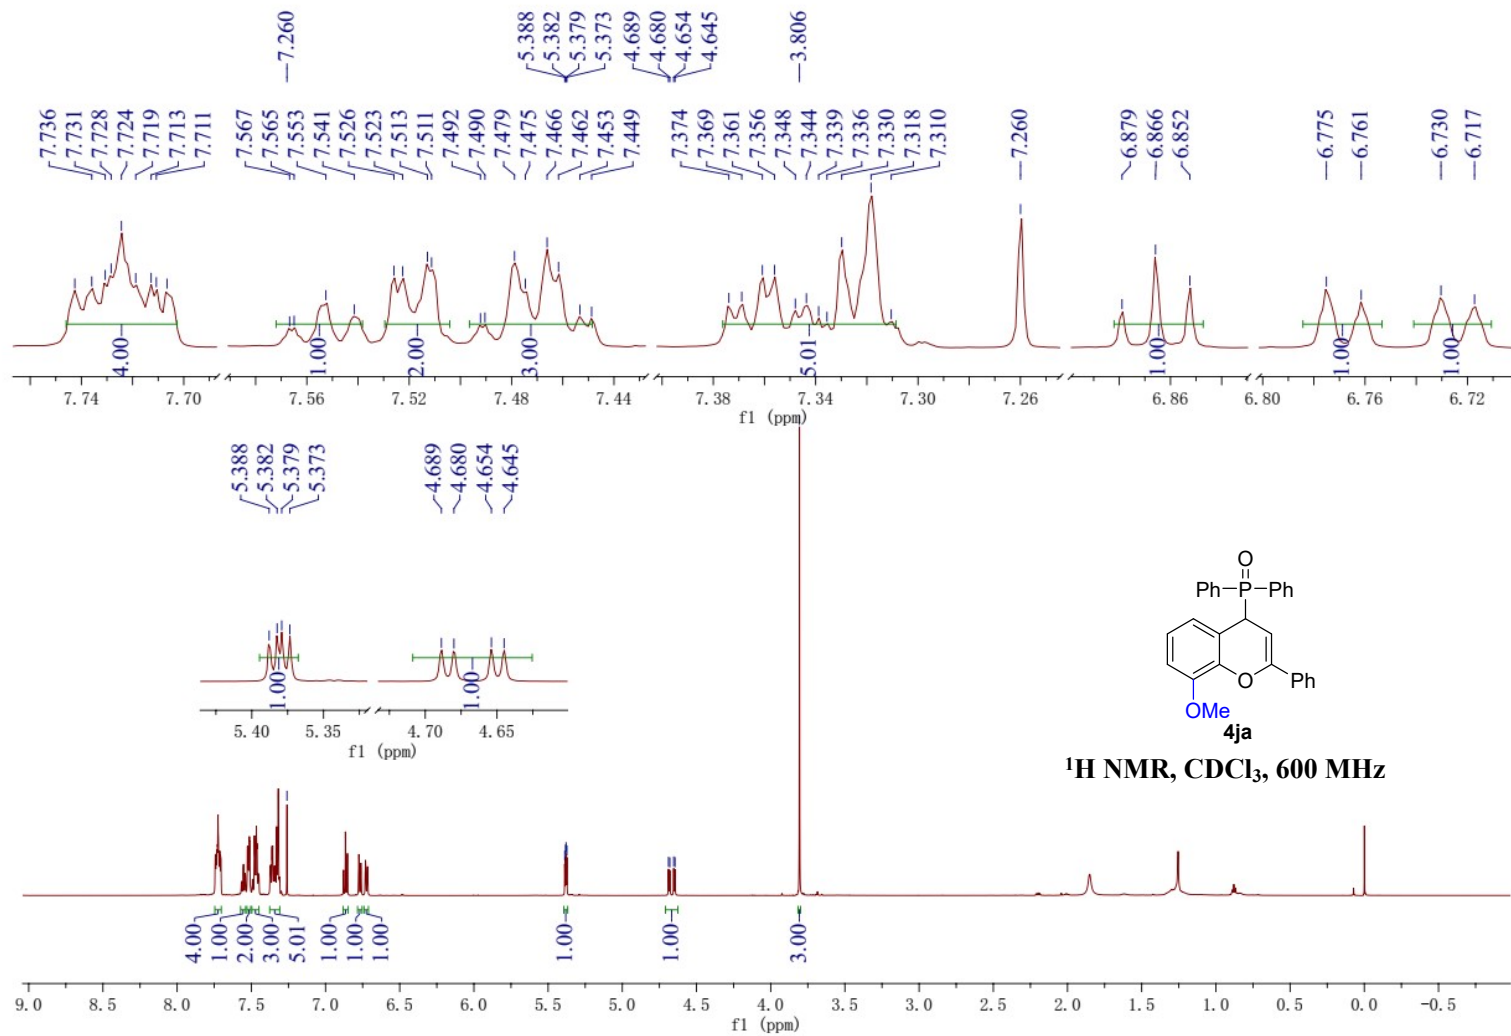

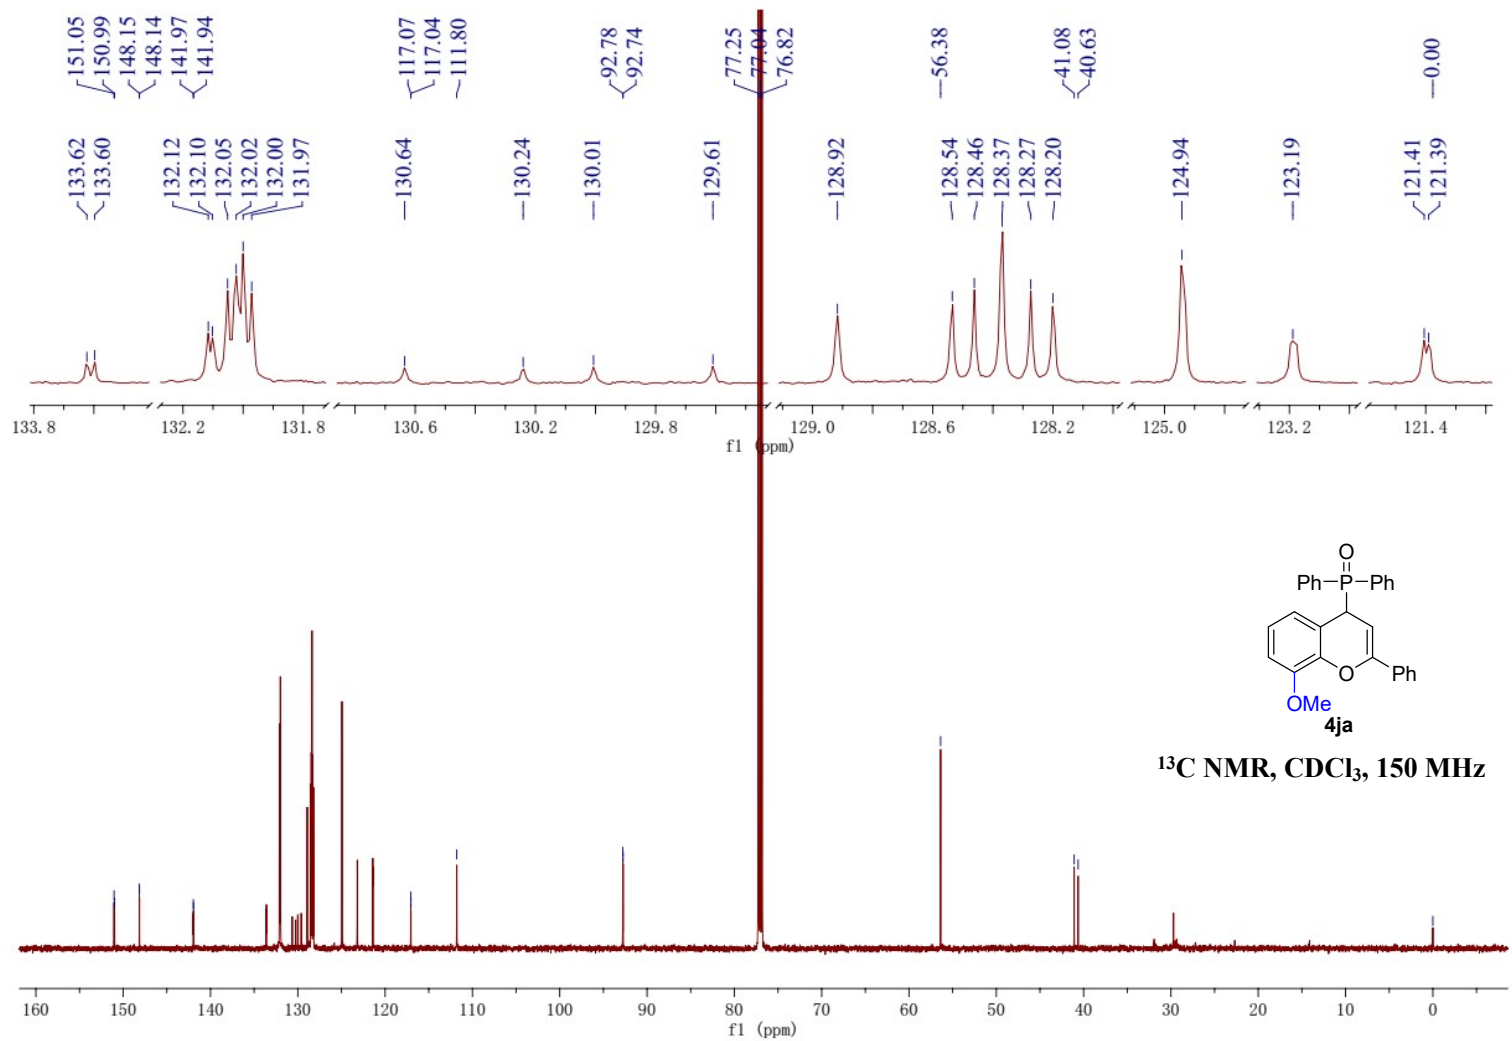



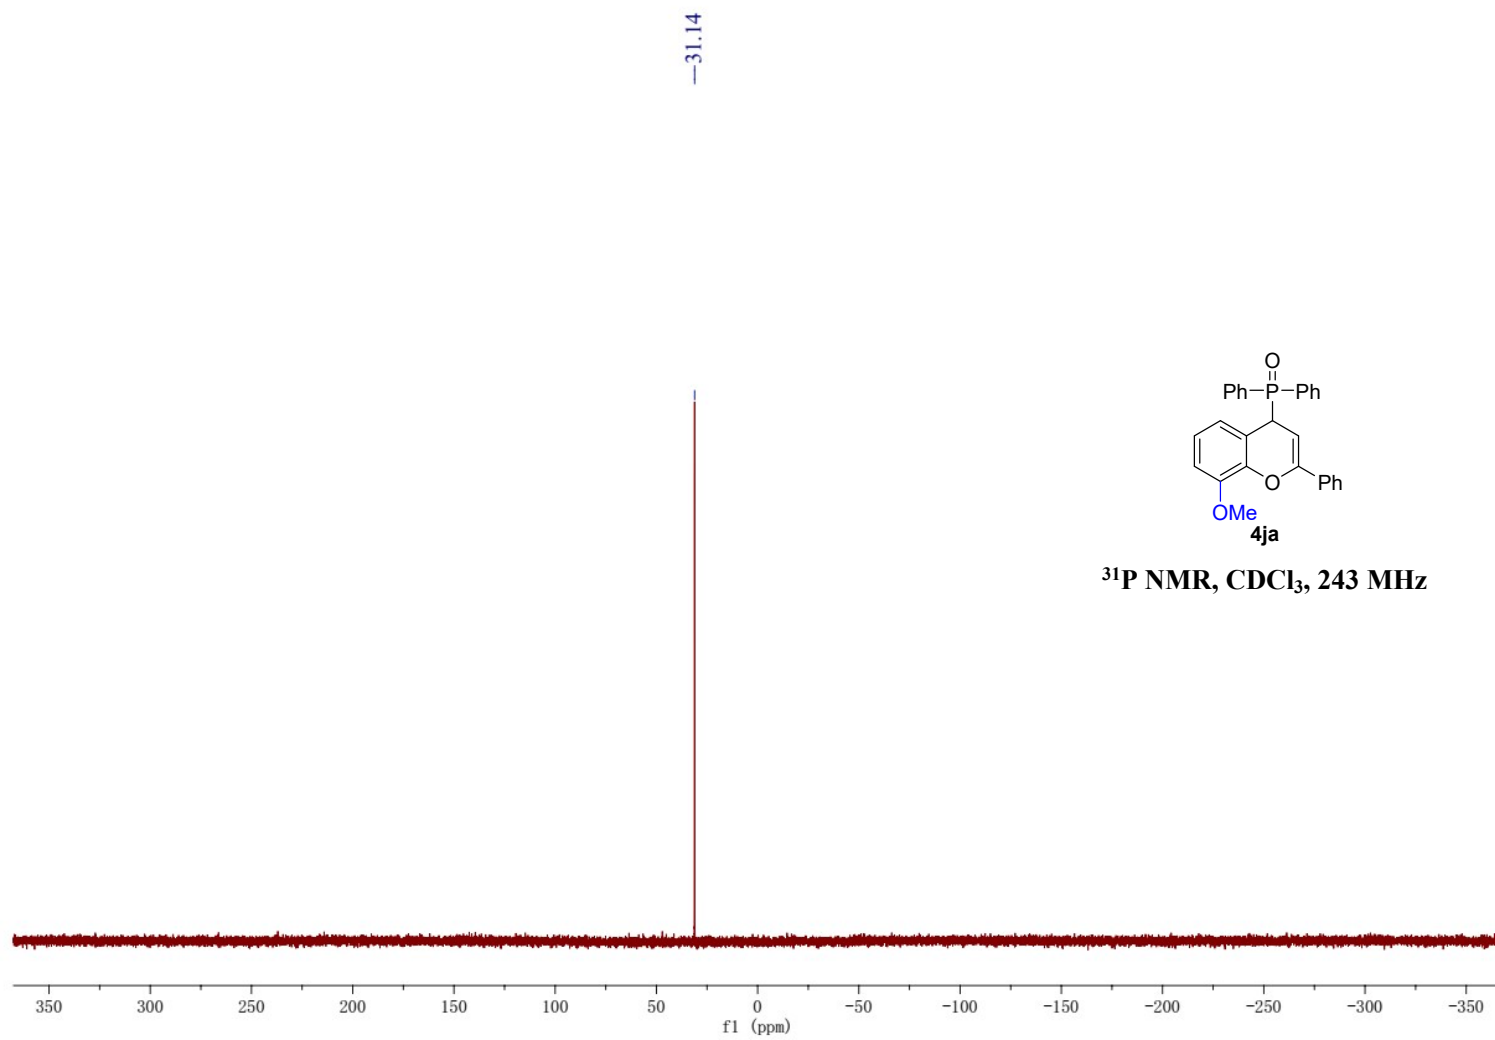



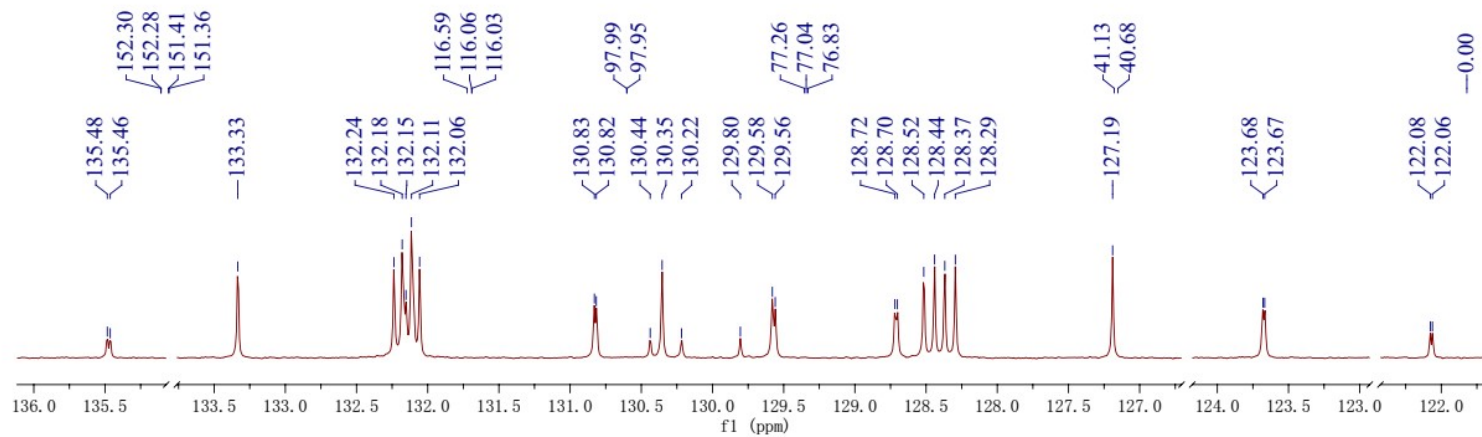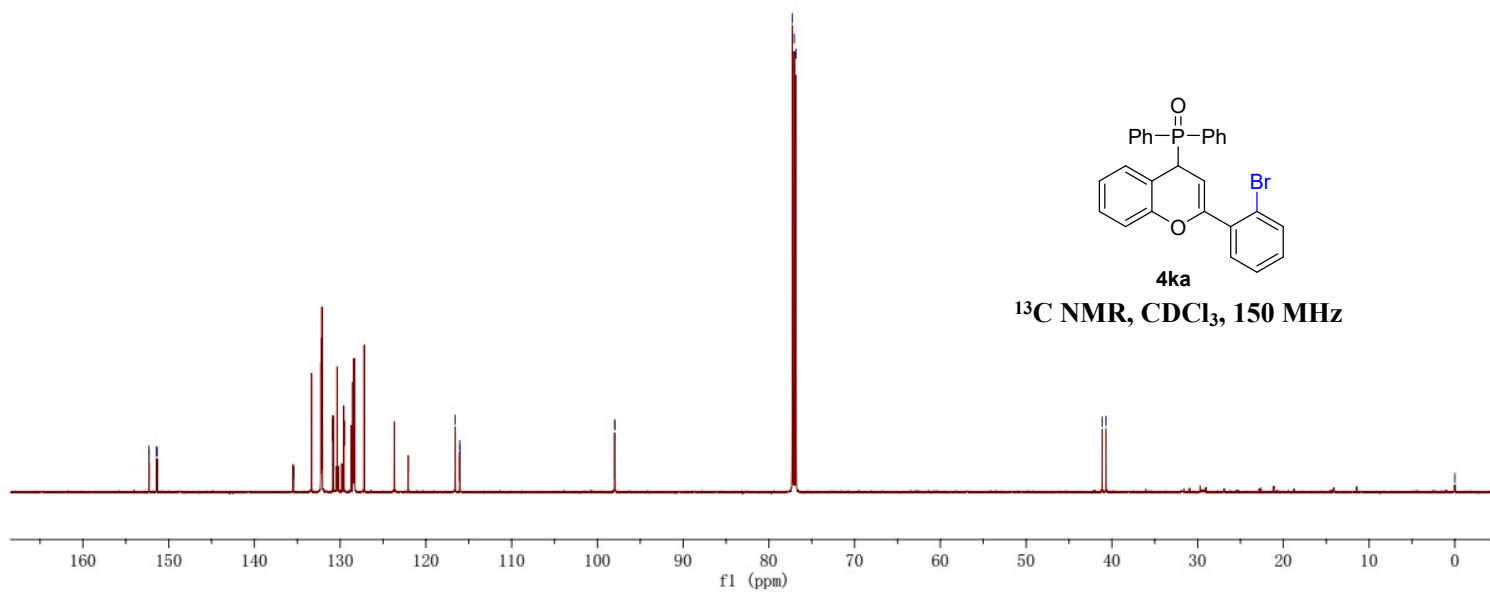

—30.92

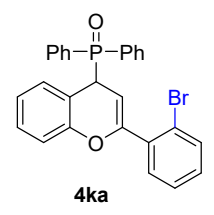

<sup>31</sup>P NMR, CDCl<sub>3</sub>, 243 MHz

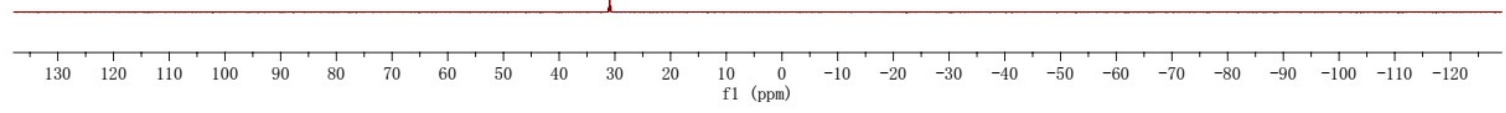

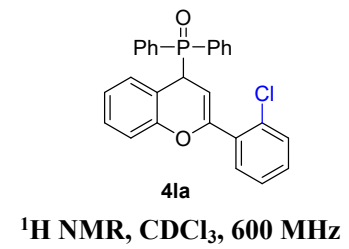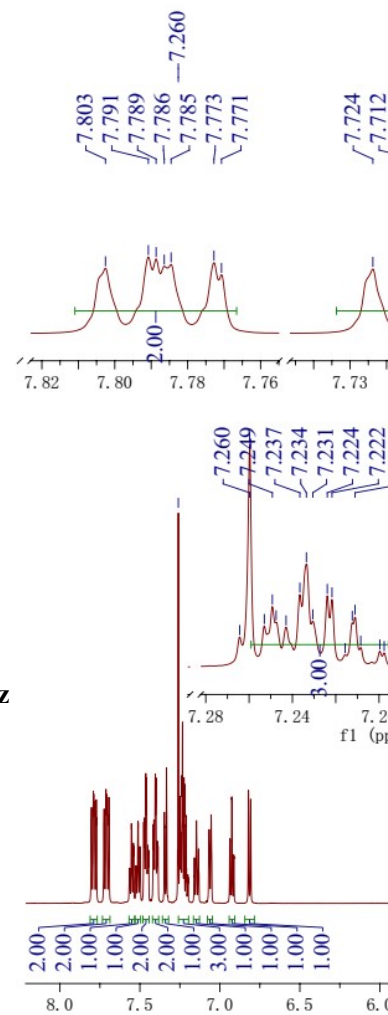

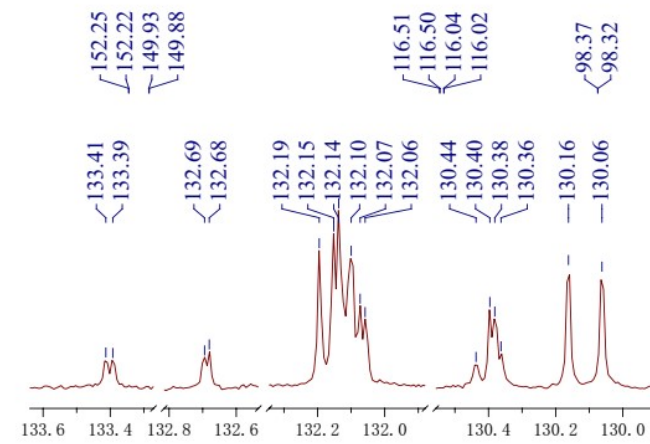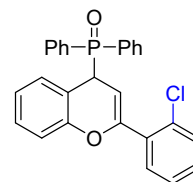

**4a**

**<sup>13</sup>C NMR, CDCl<sub>3</sub>, 150 MHz**

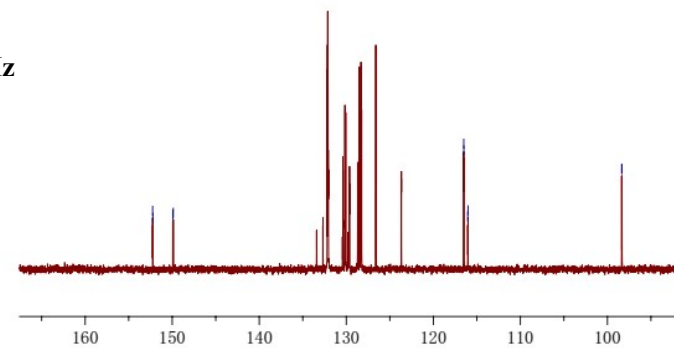

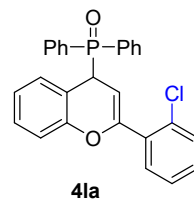

<sup>31</sup>P NMR, CDCl<sub>3</sub>, 243 MHz

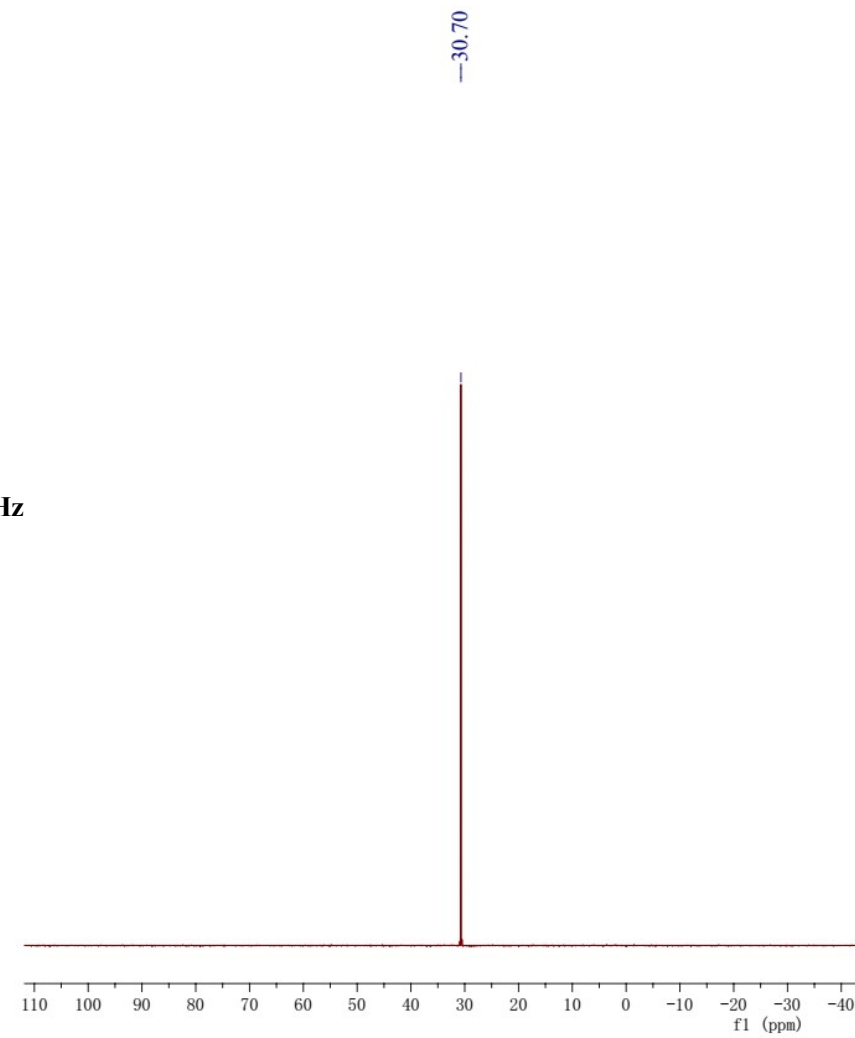

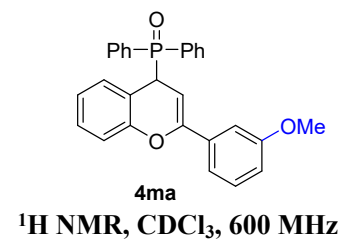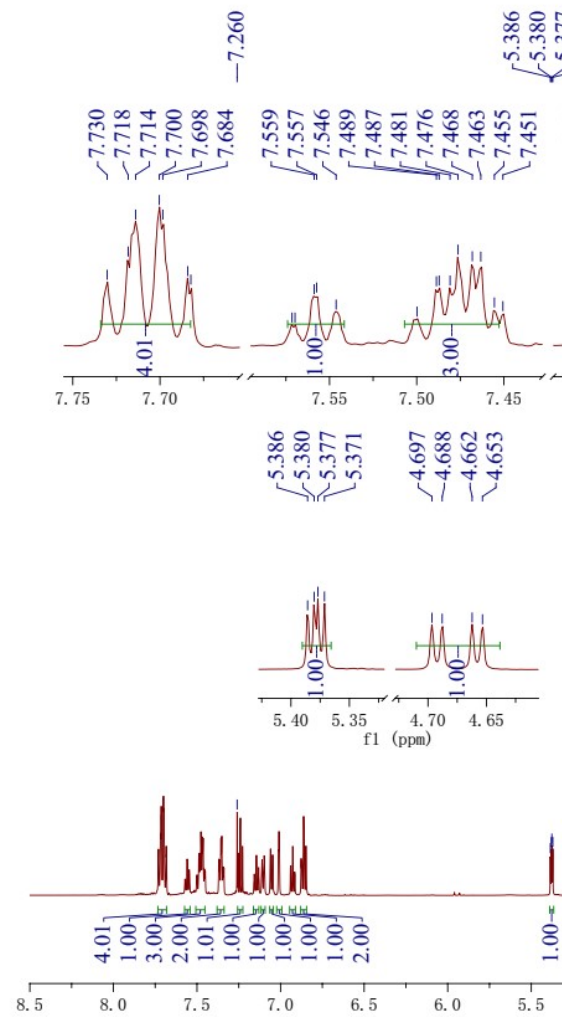



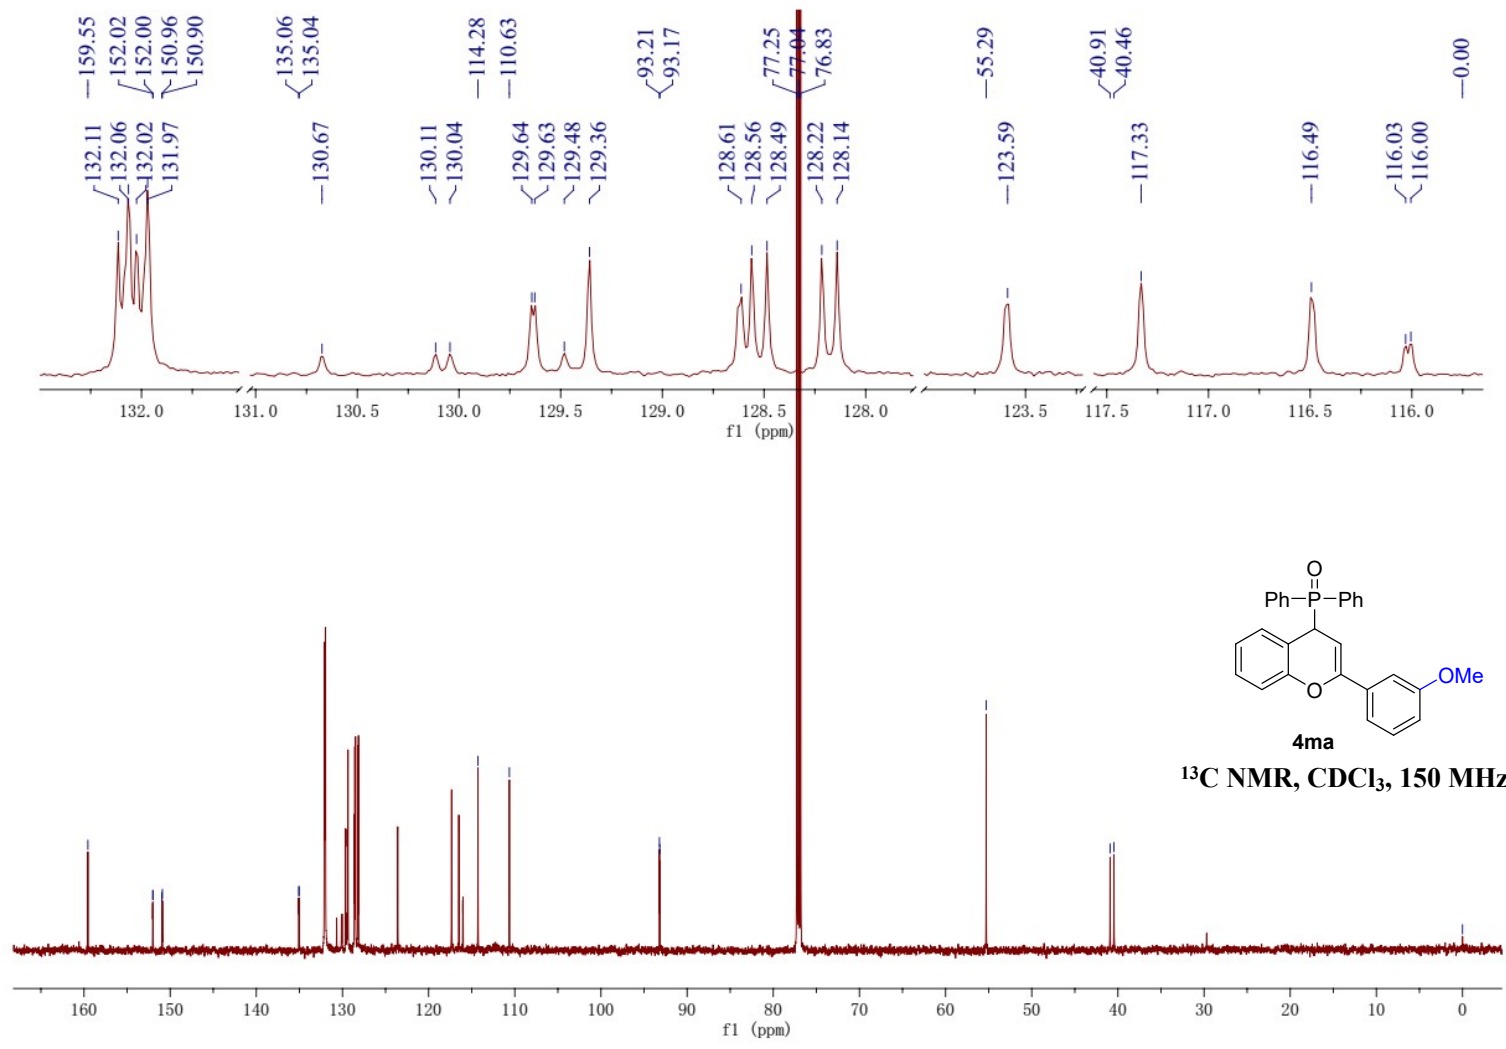

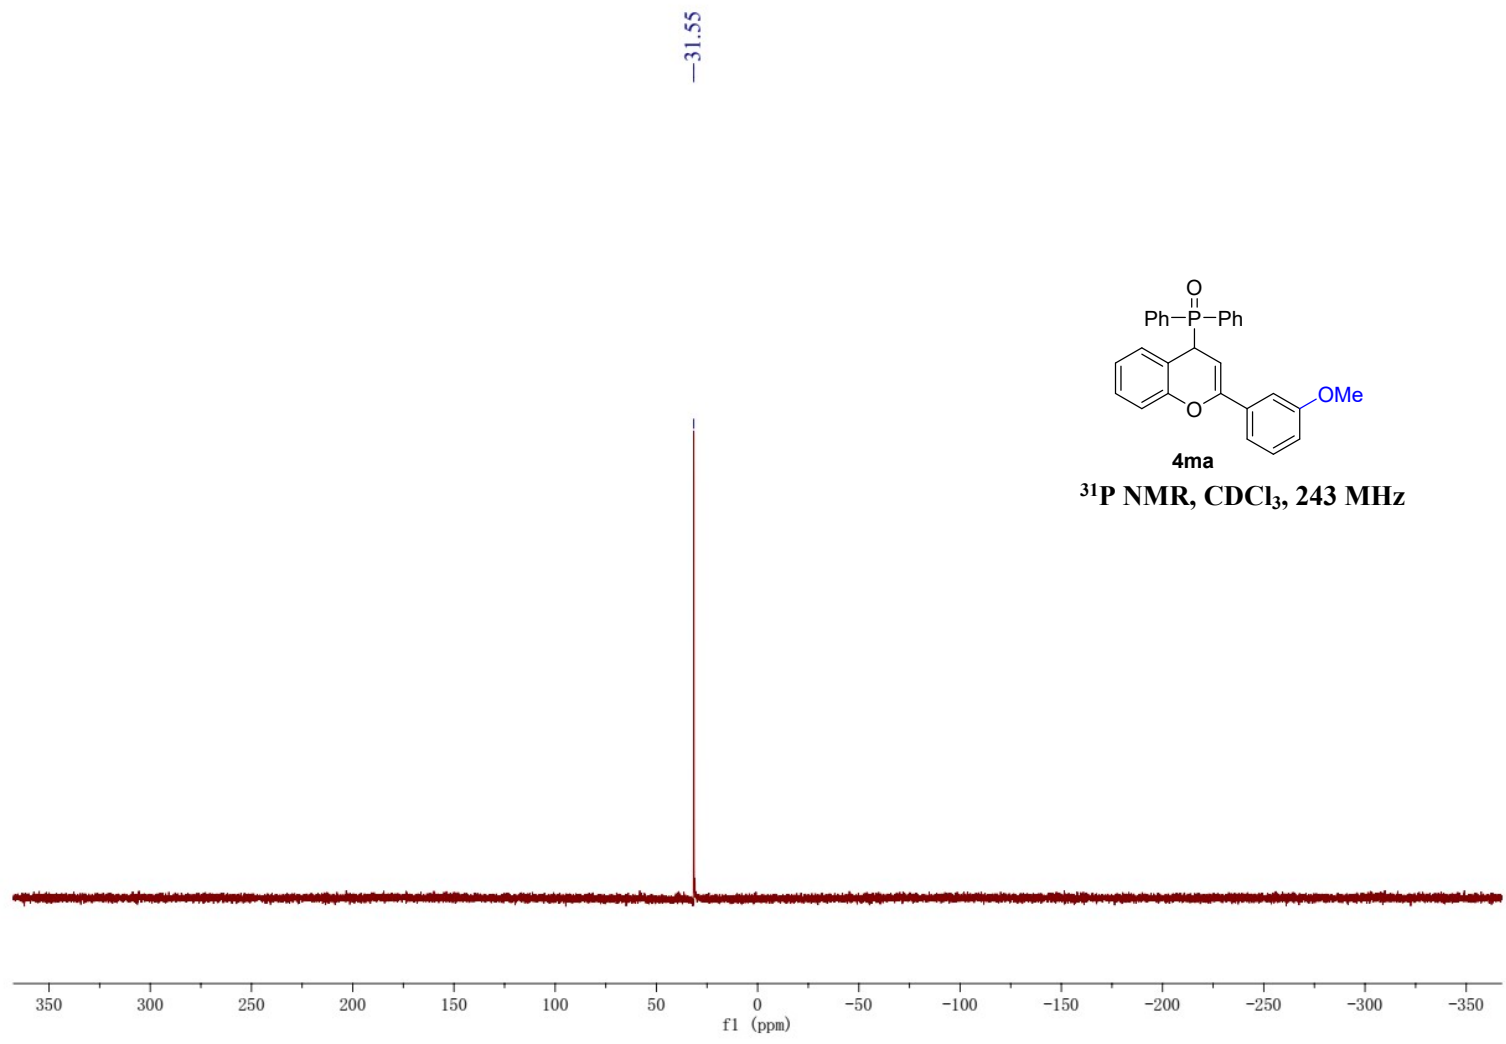

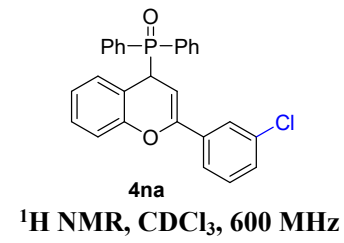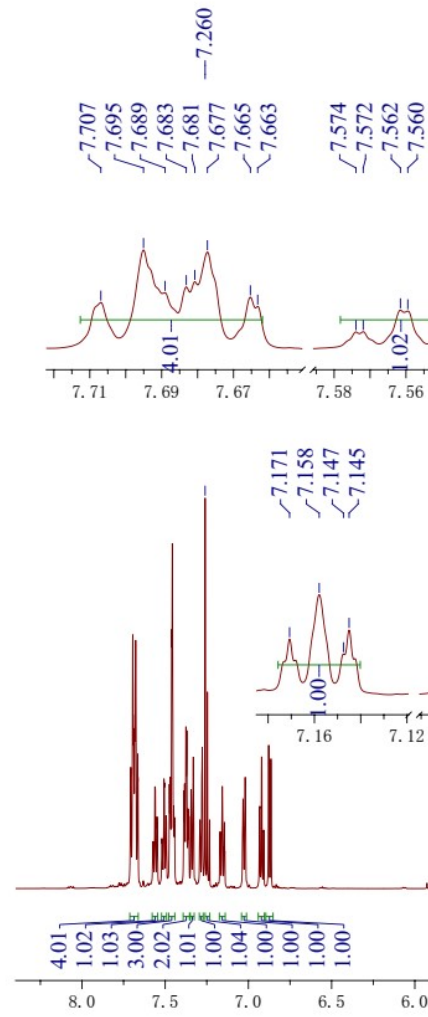

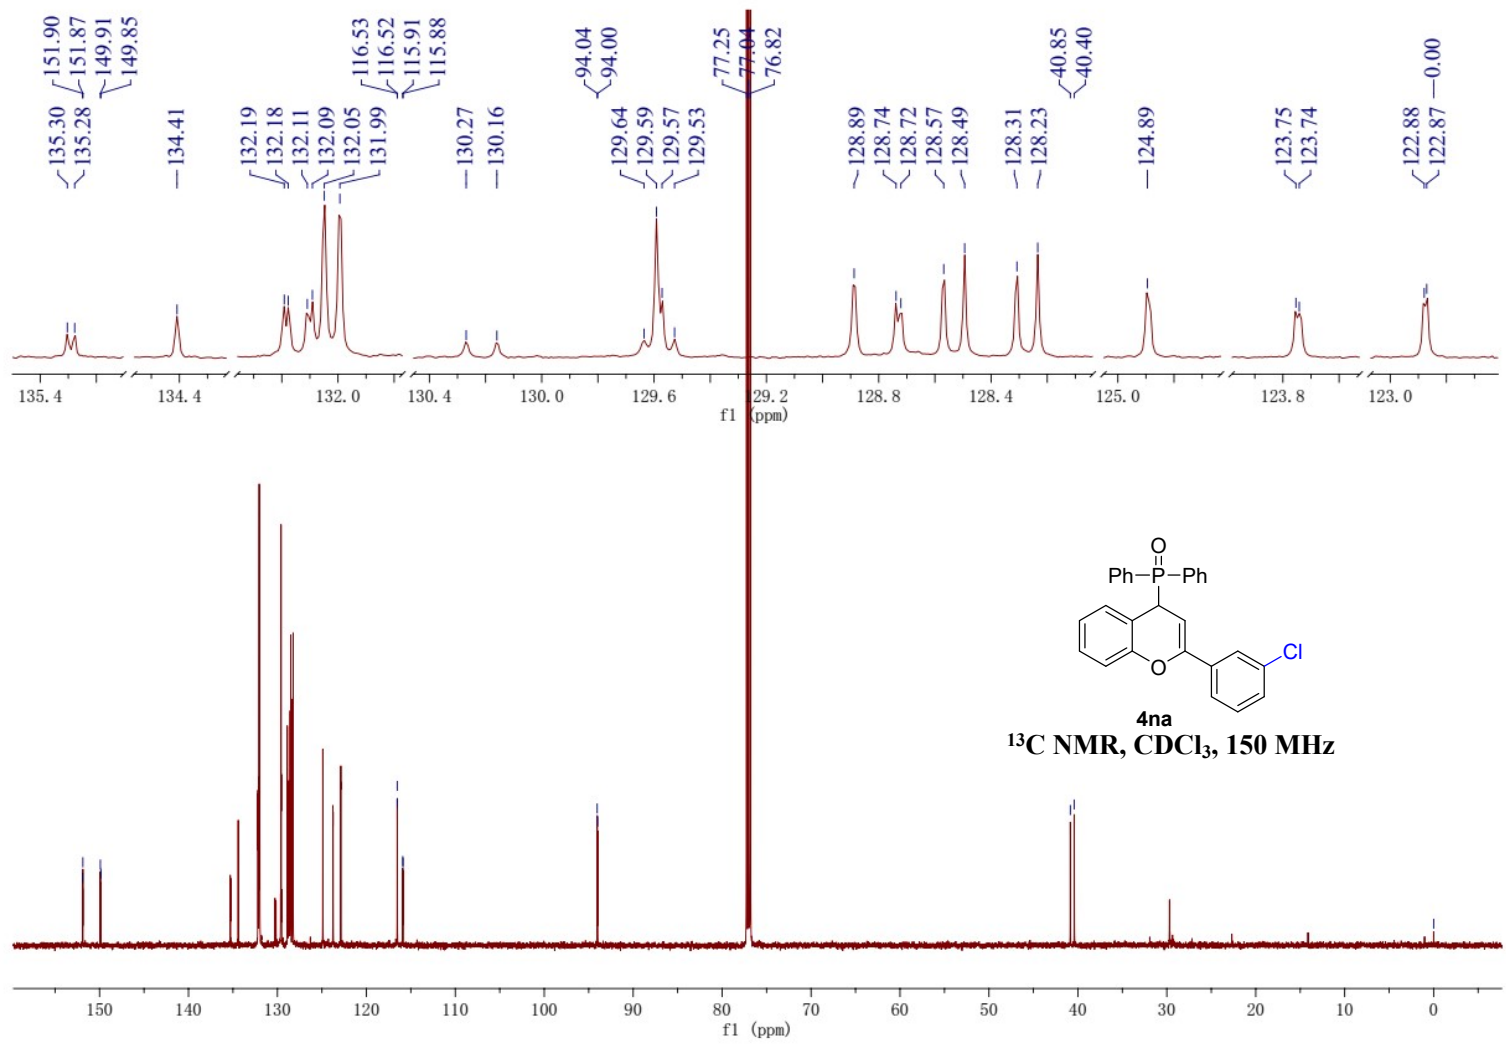

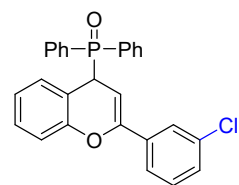

4na

<sup>31</sup>P NMR, CDCl<sub>3</sub>, 243 MHz

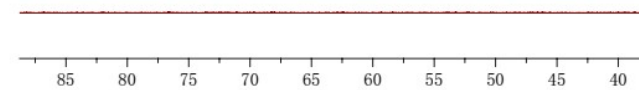

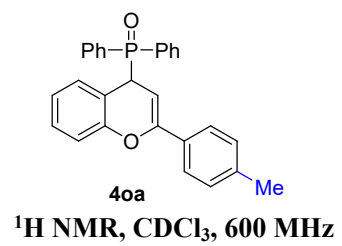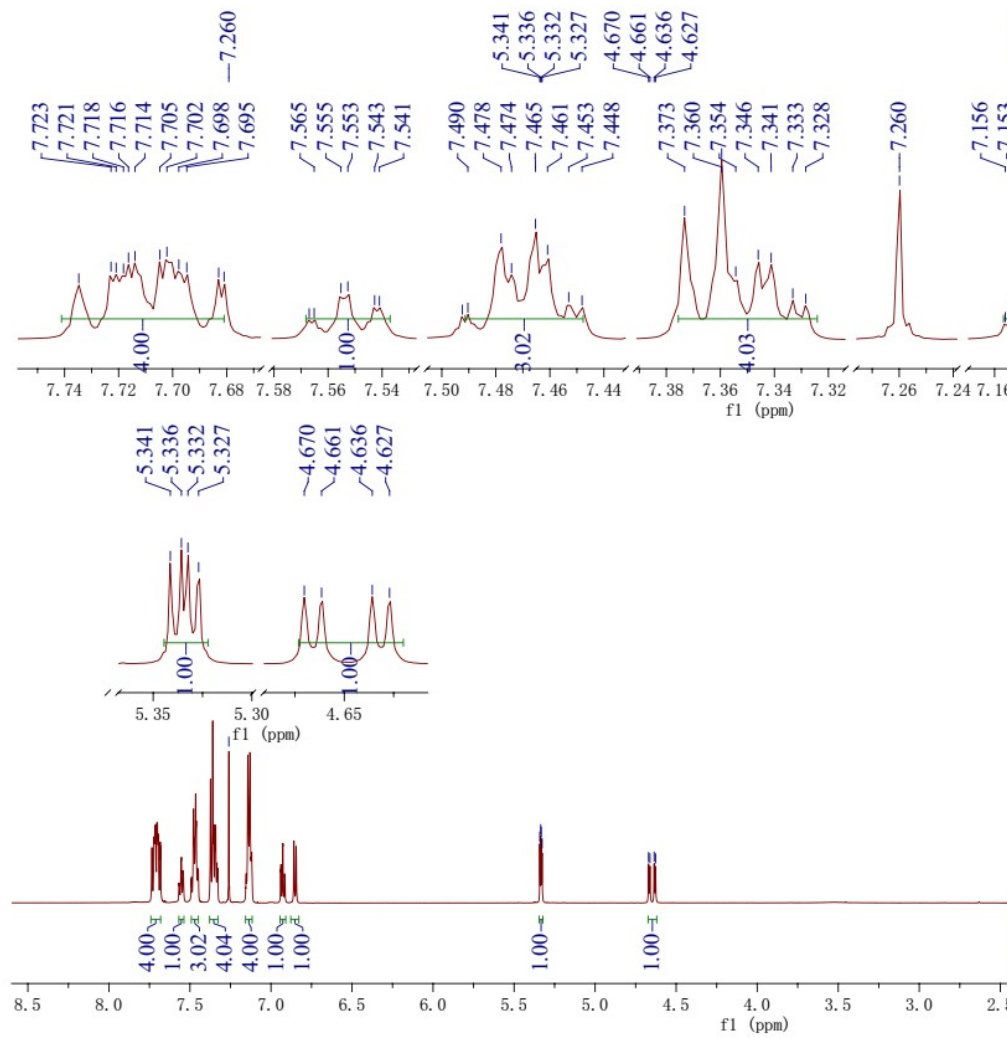

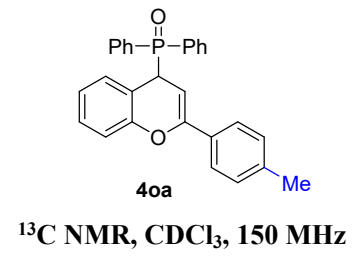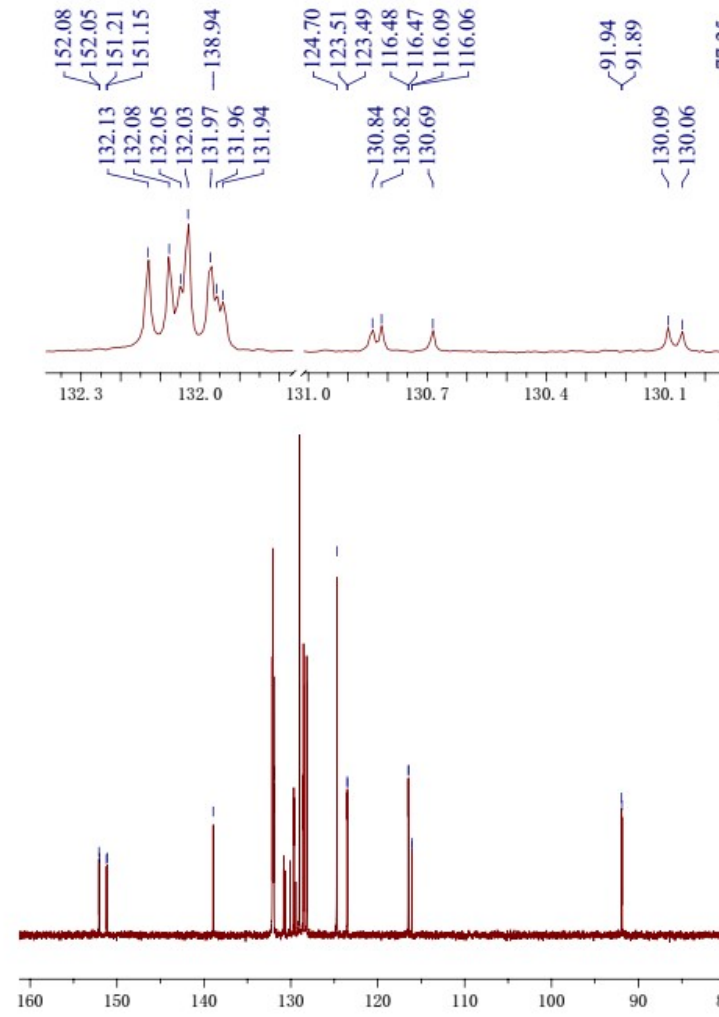

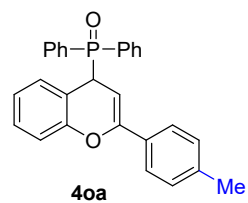

<sup>31</sup>P NMR, CDCl<sub>3</sub>, 243 MHz

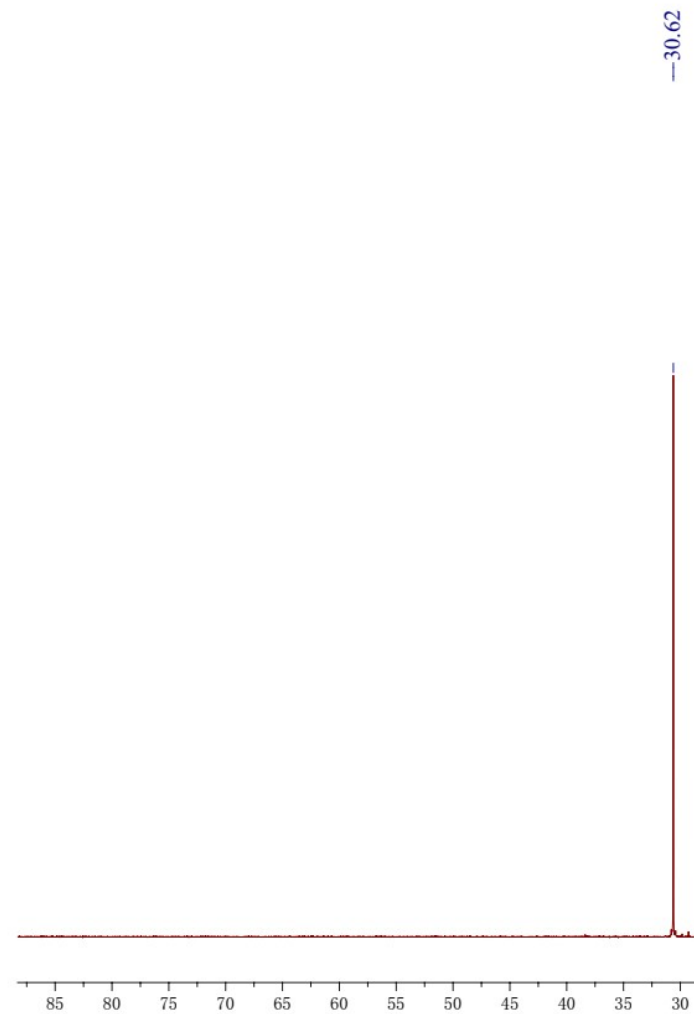





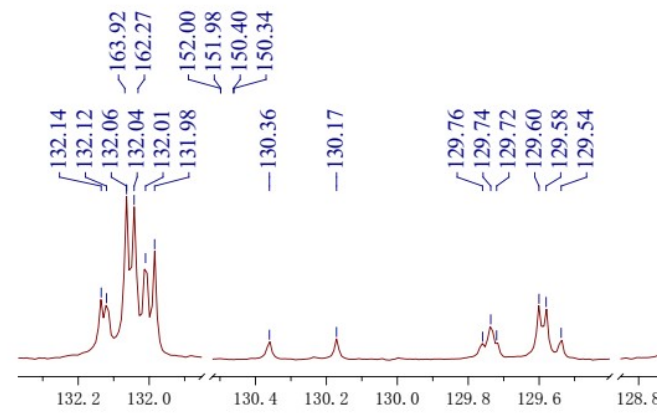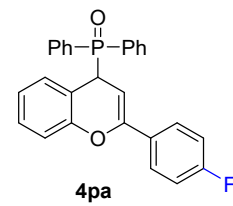

<sup>13</sup>C NMR, CDCl<sub>3</sub>, 150 MHz

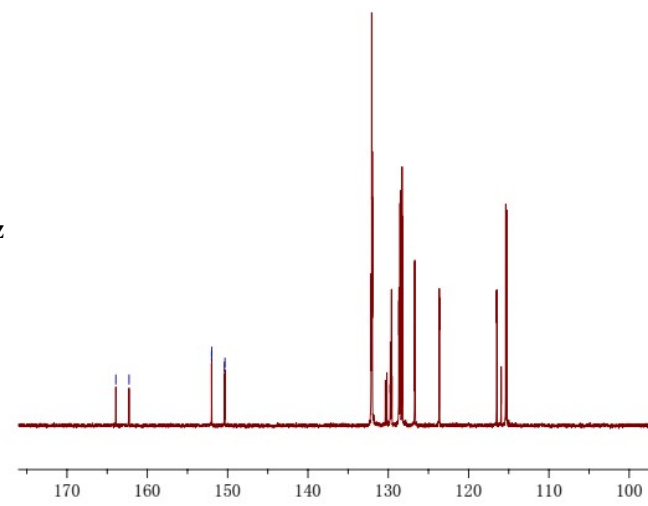

-31.29

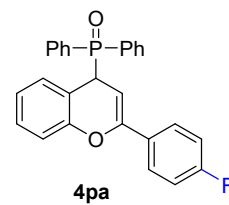

<sup>31</sup>P NMR, CDCl<sub>3</sub>, 243 MHz

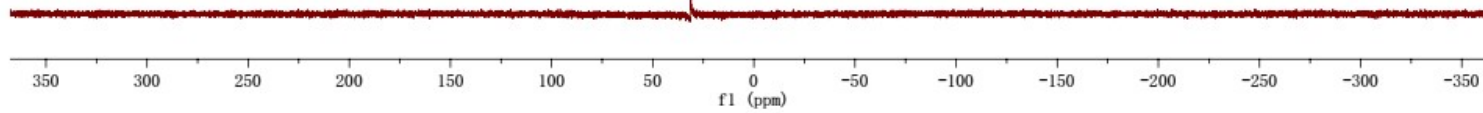

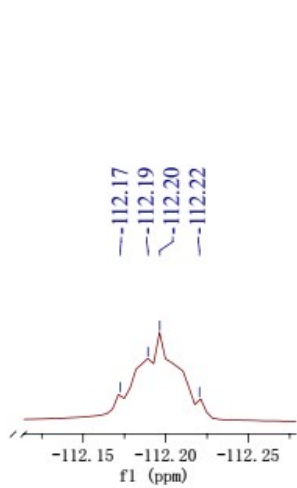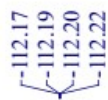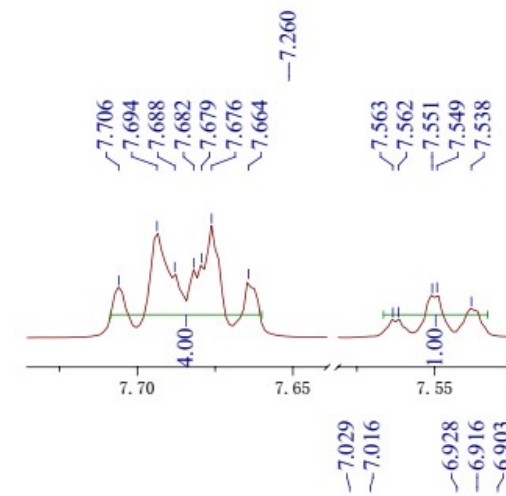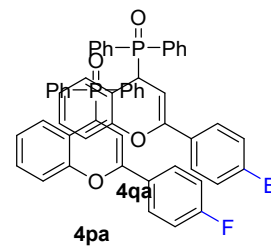

**<sup>19</sup>F NMR, CDCl<sub>3</sub>, 564 MHz**

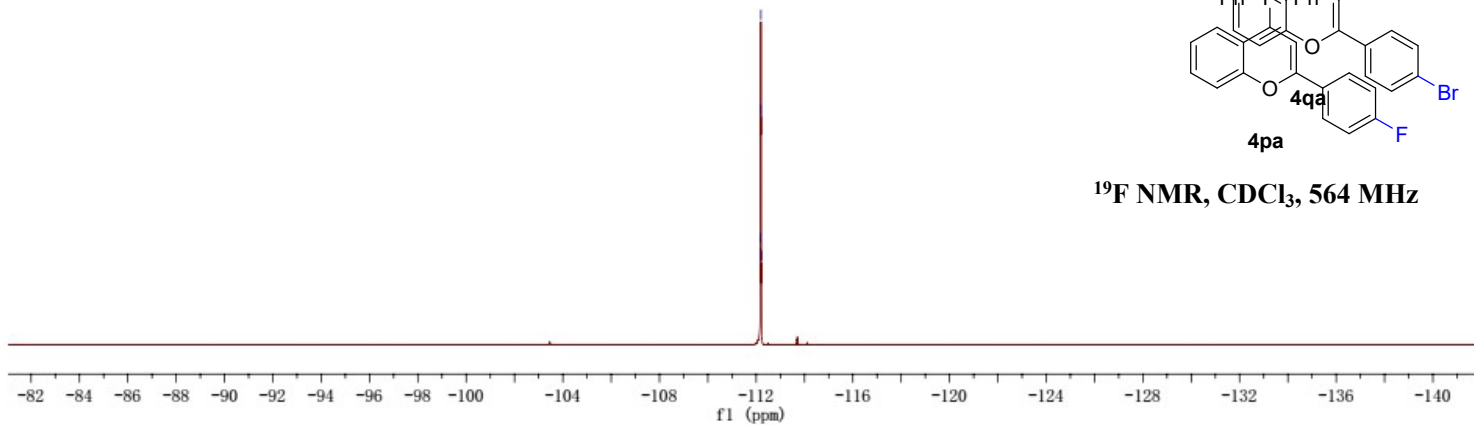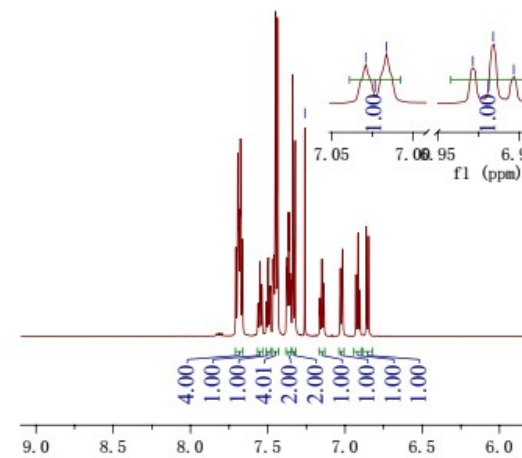

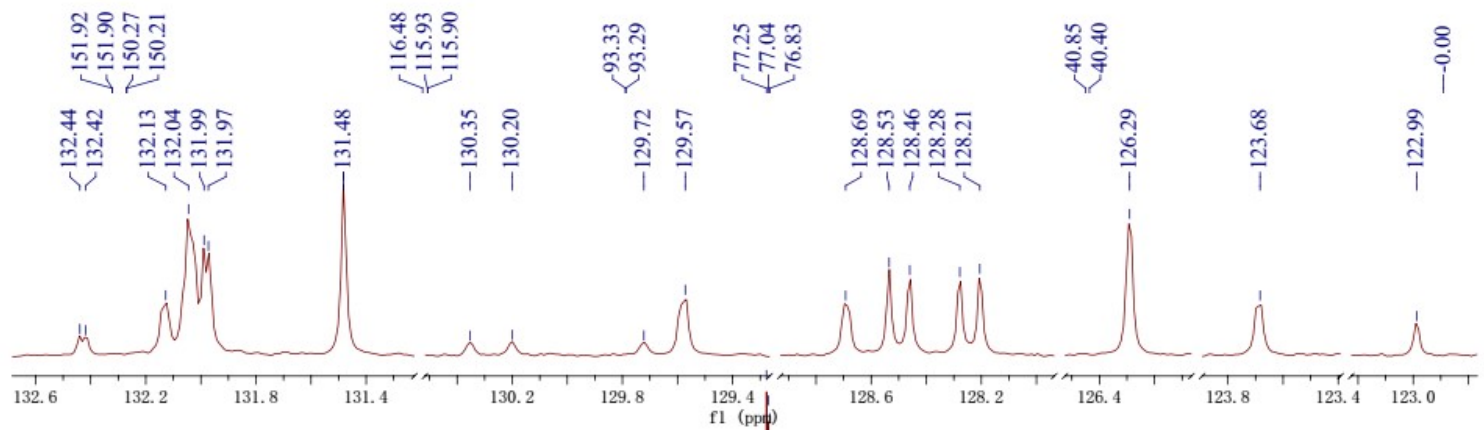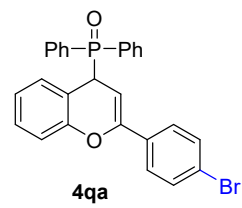

<sup>13</sup>C NMR, CDCl<sub>3</sub>, 150 MHz

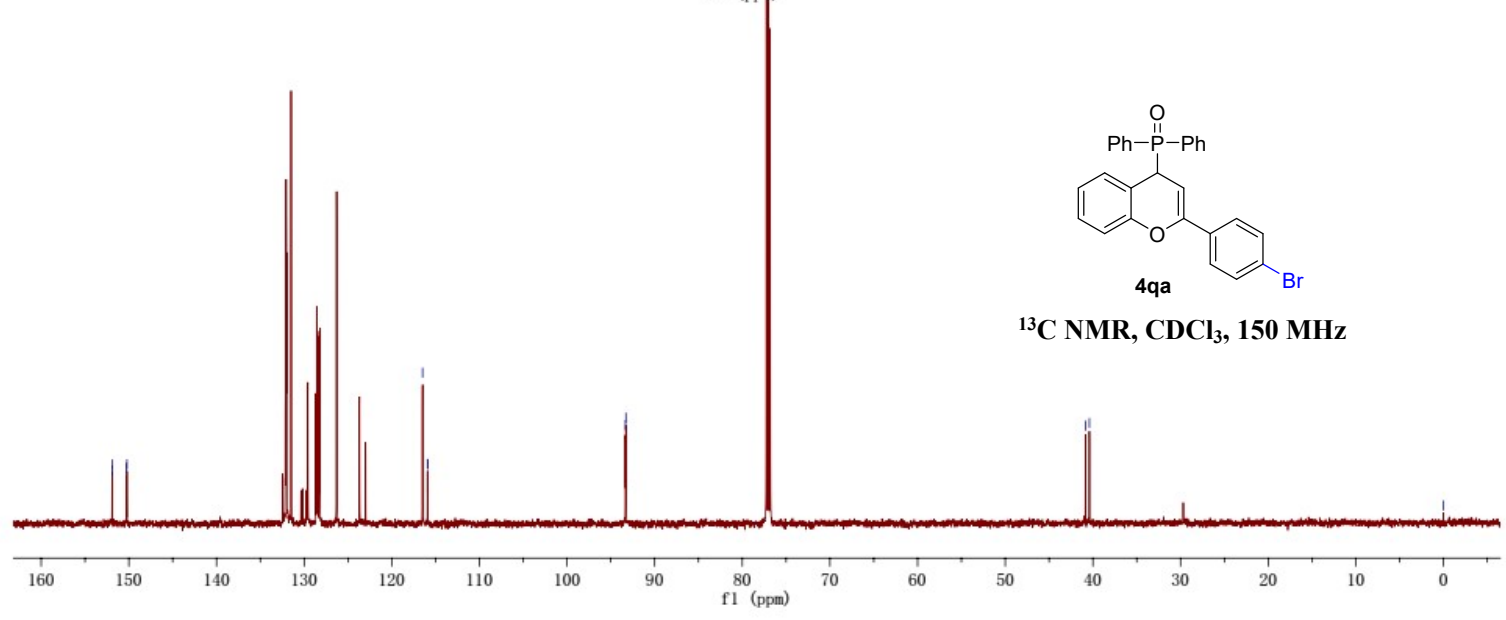

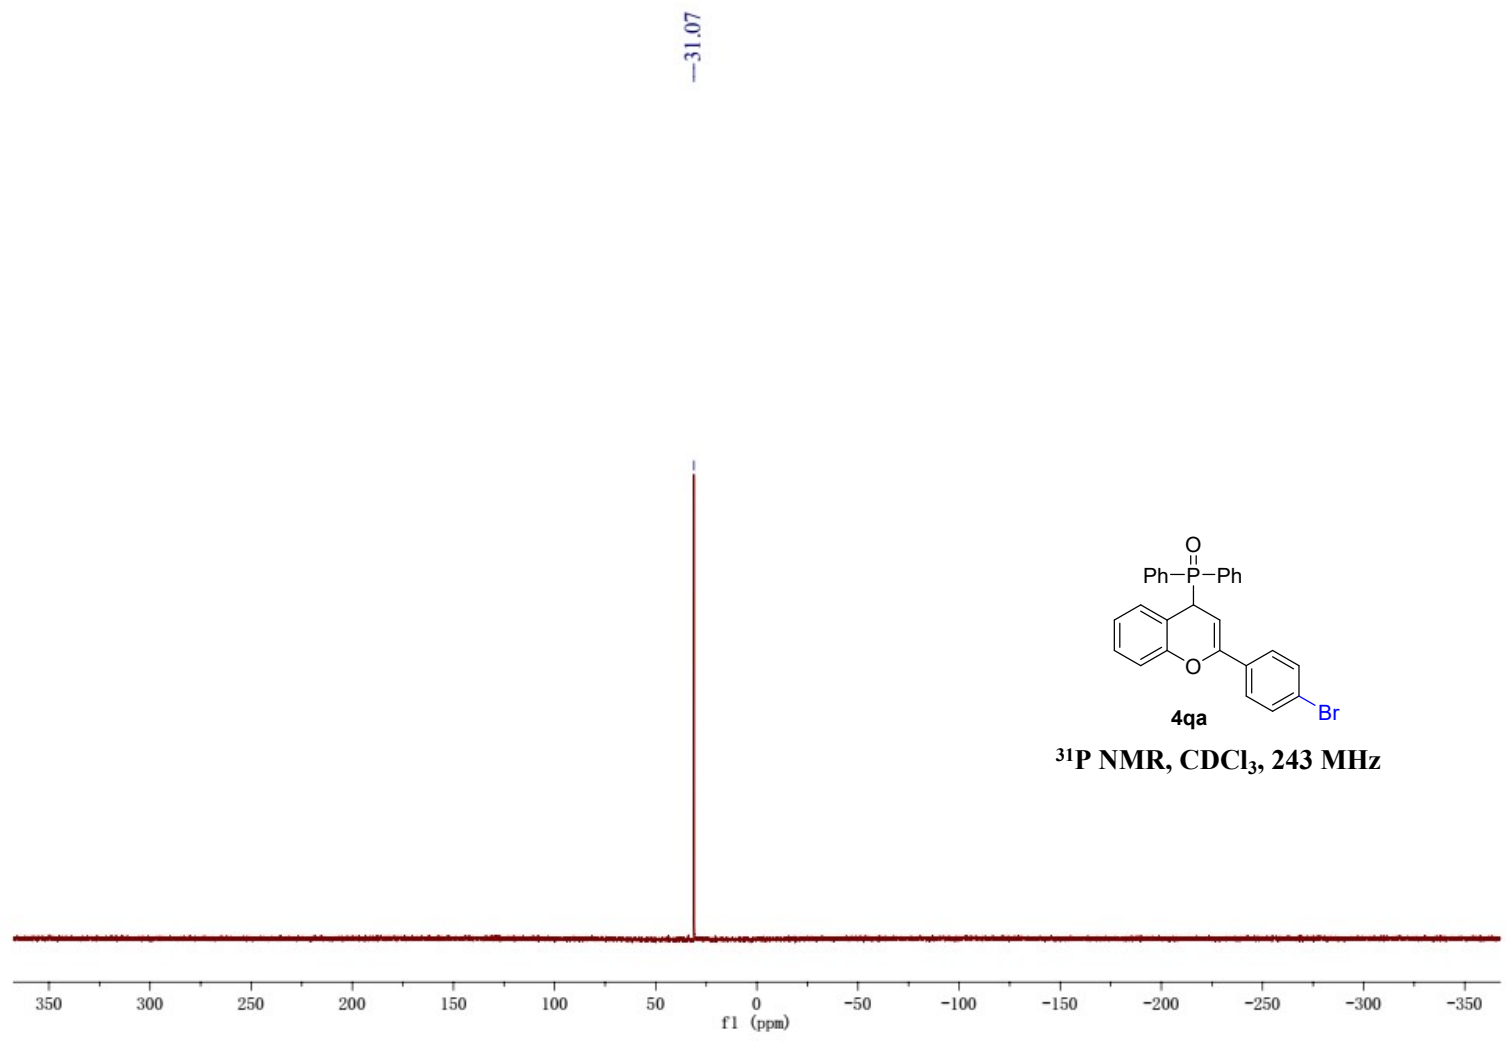



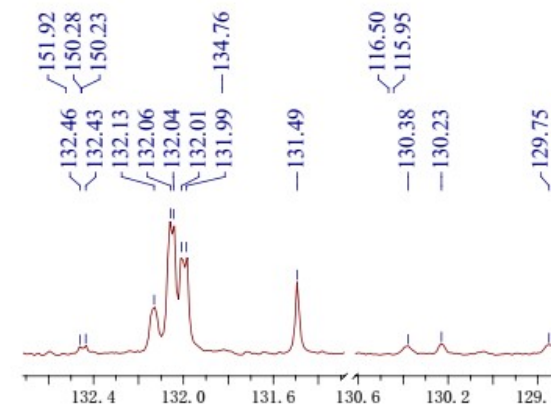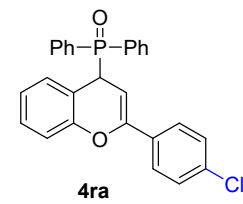

**4ra**  
<sup>13</sup>C NMR, CDCl<sub>3</sub>, 150 MHz

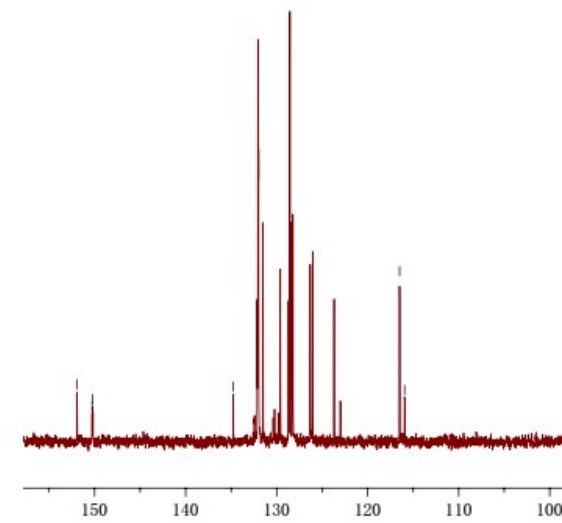



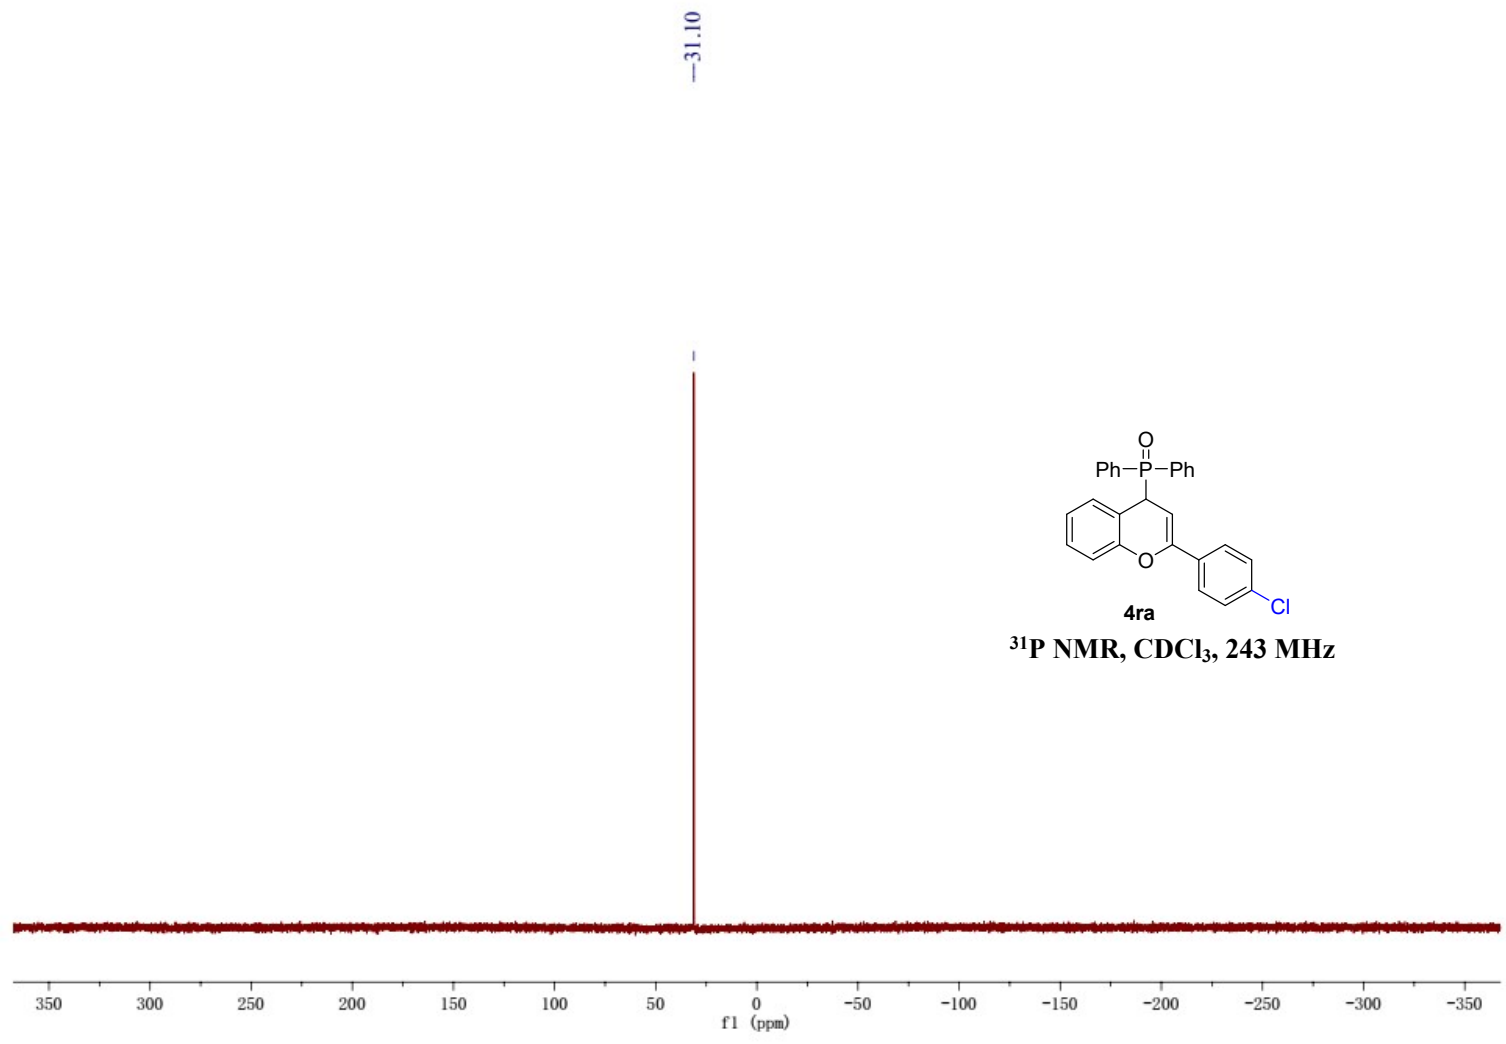



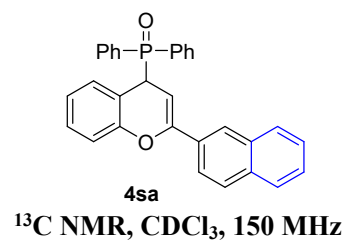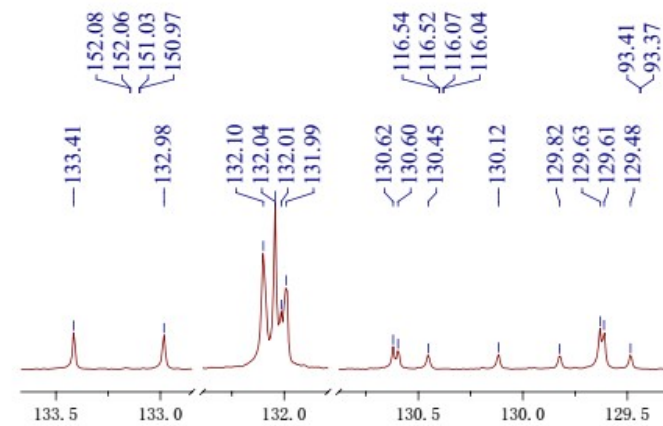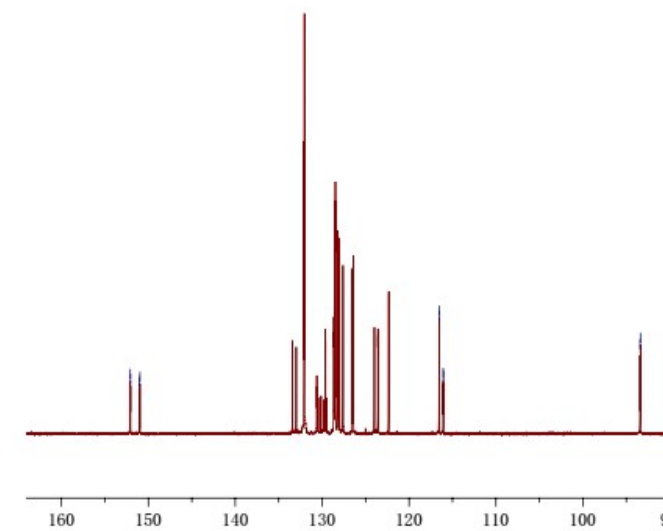

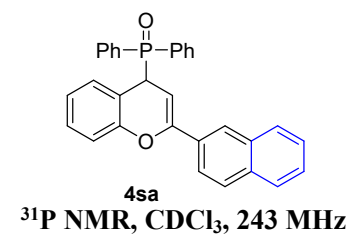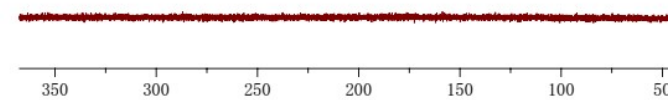

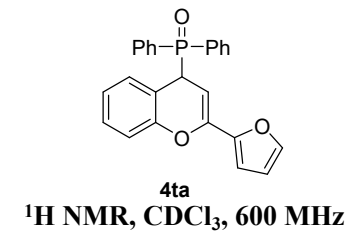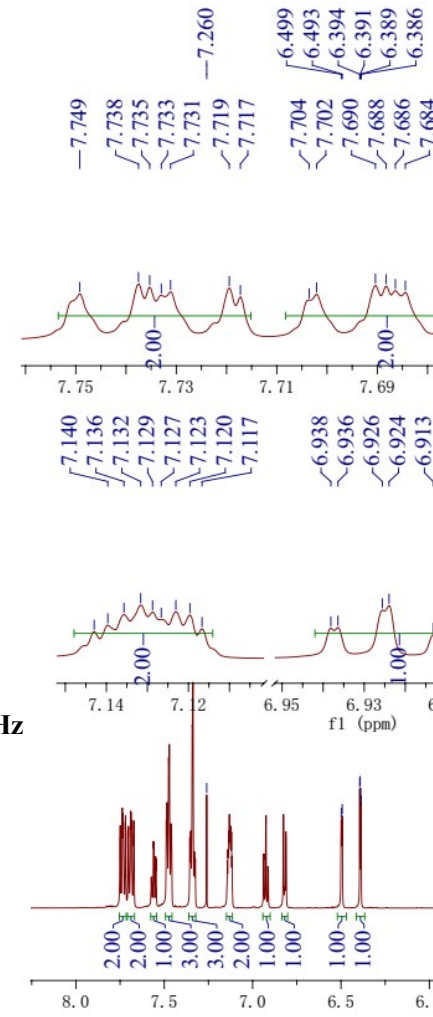

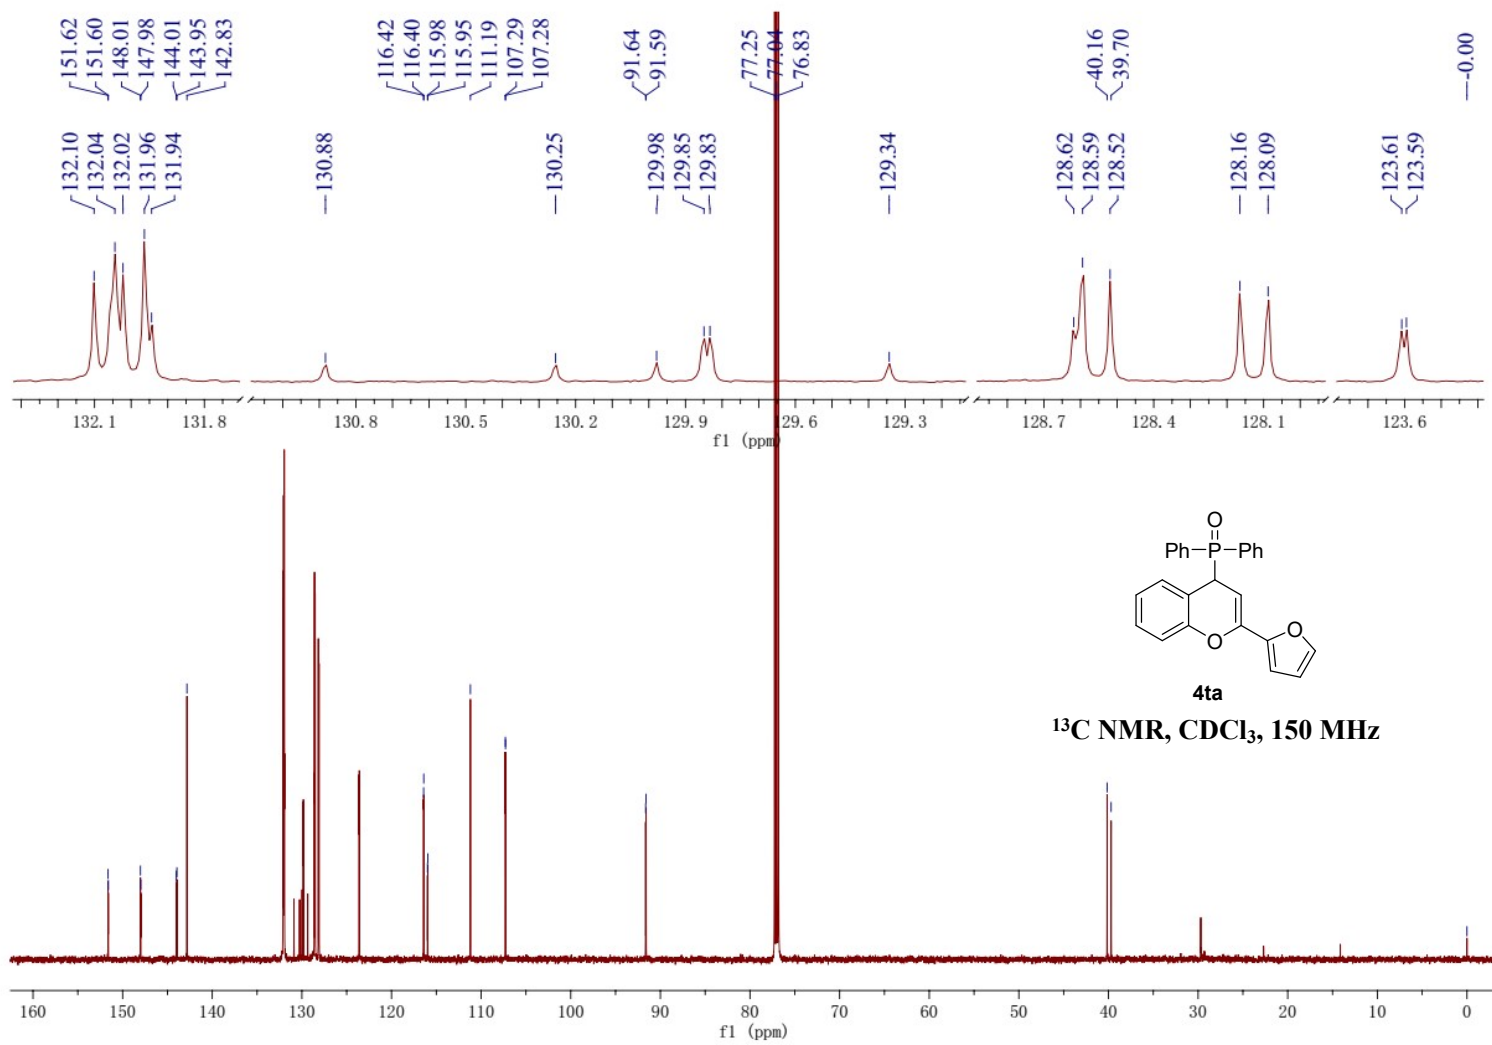

—30.19

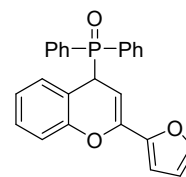

**4ta**

**<sup>31</sup>P NMR, CDCl<sub>3</sub>, 243 MHz**

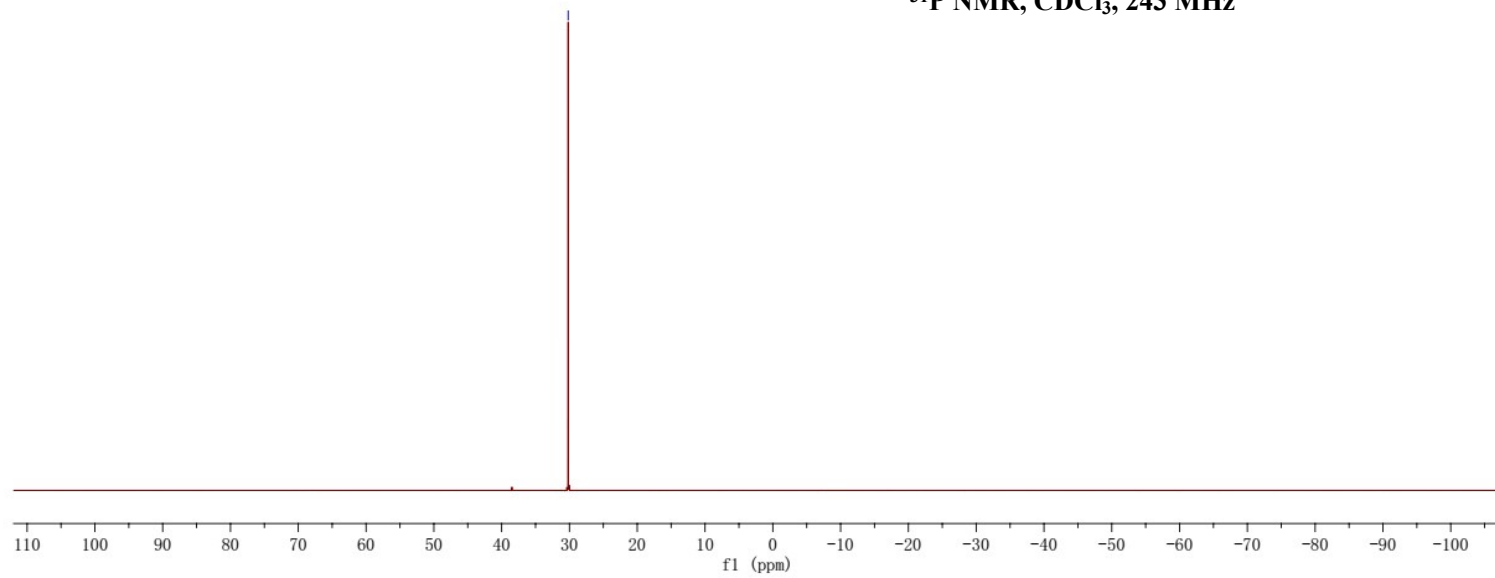

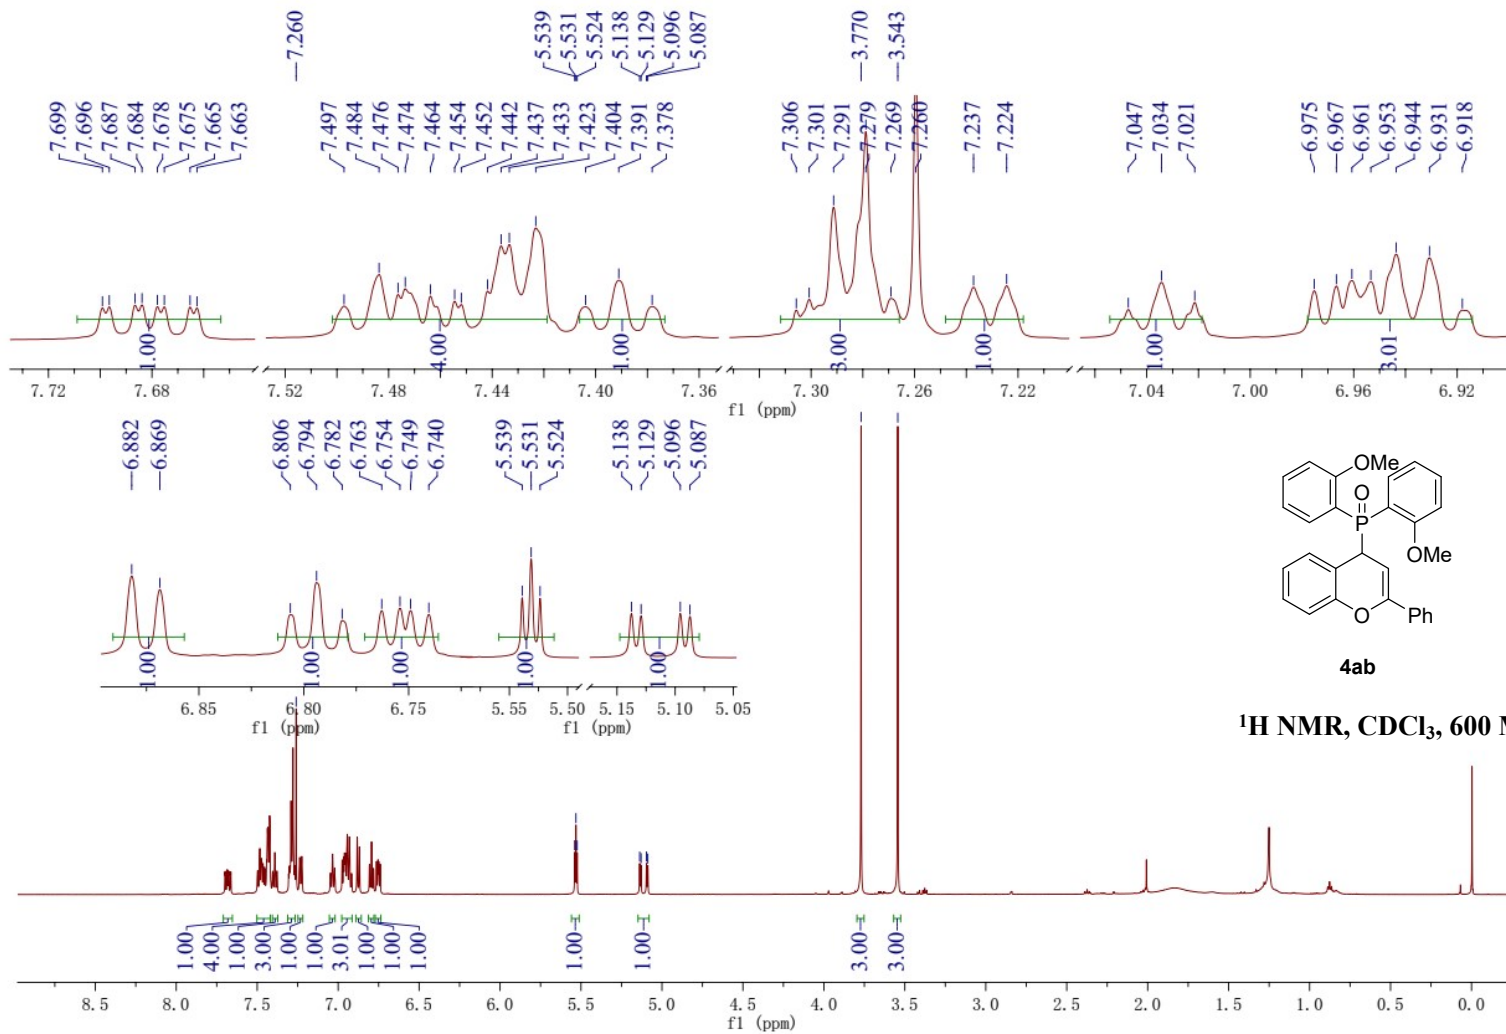



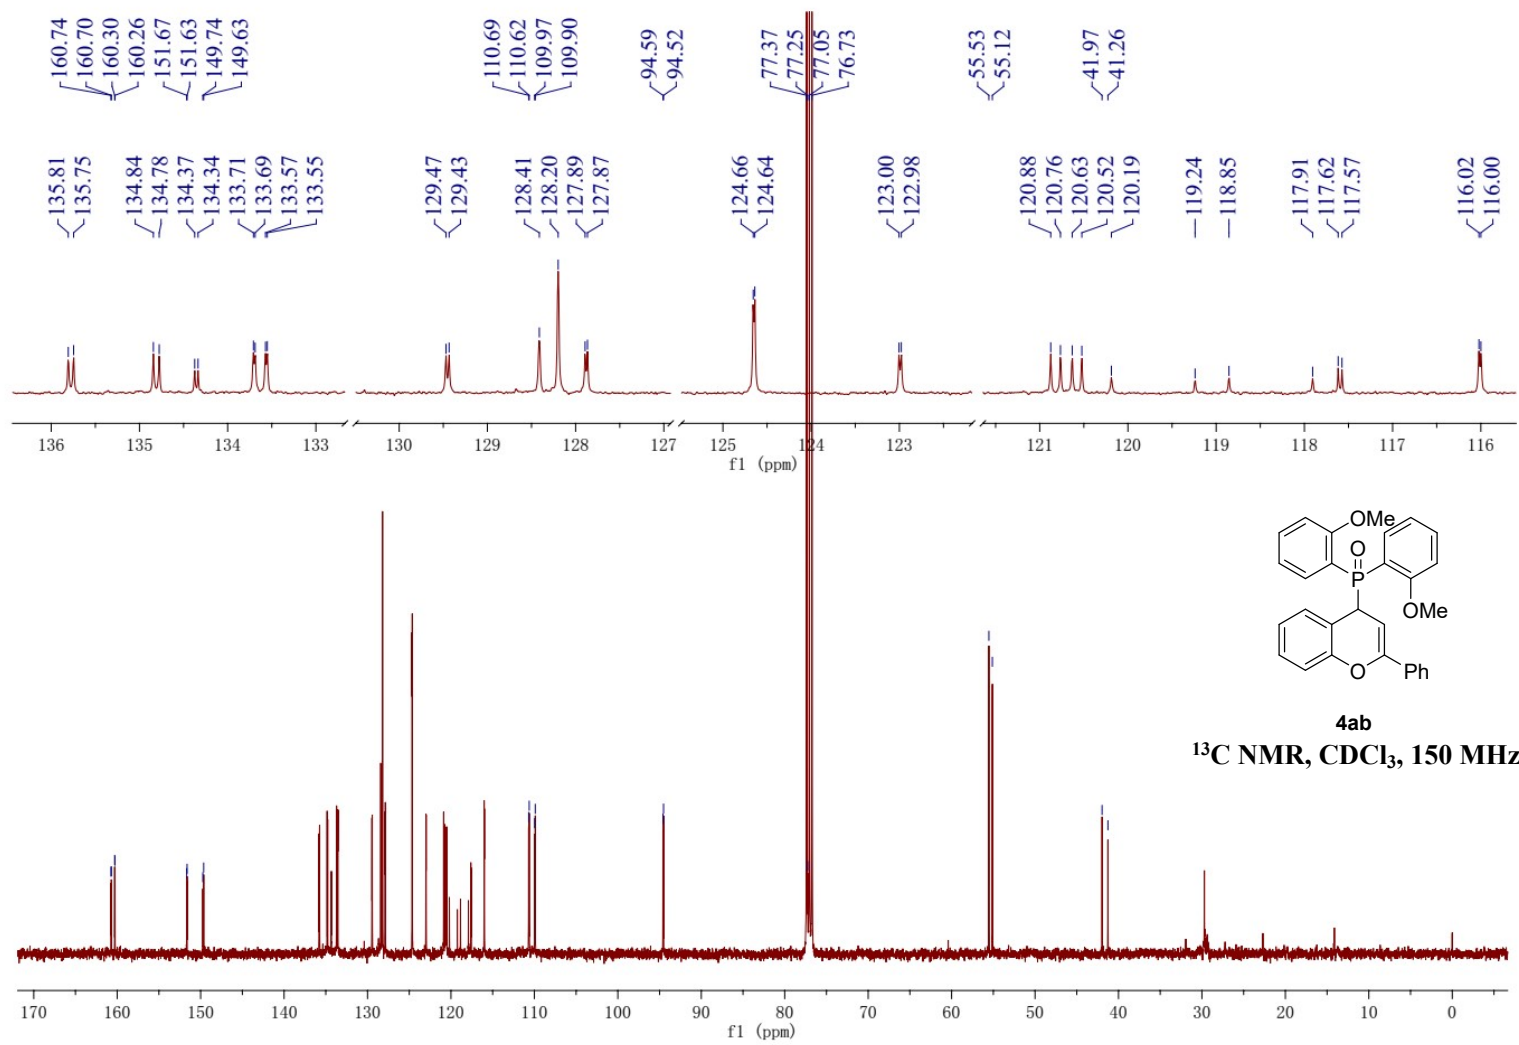

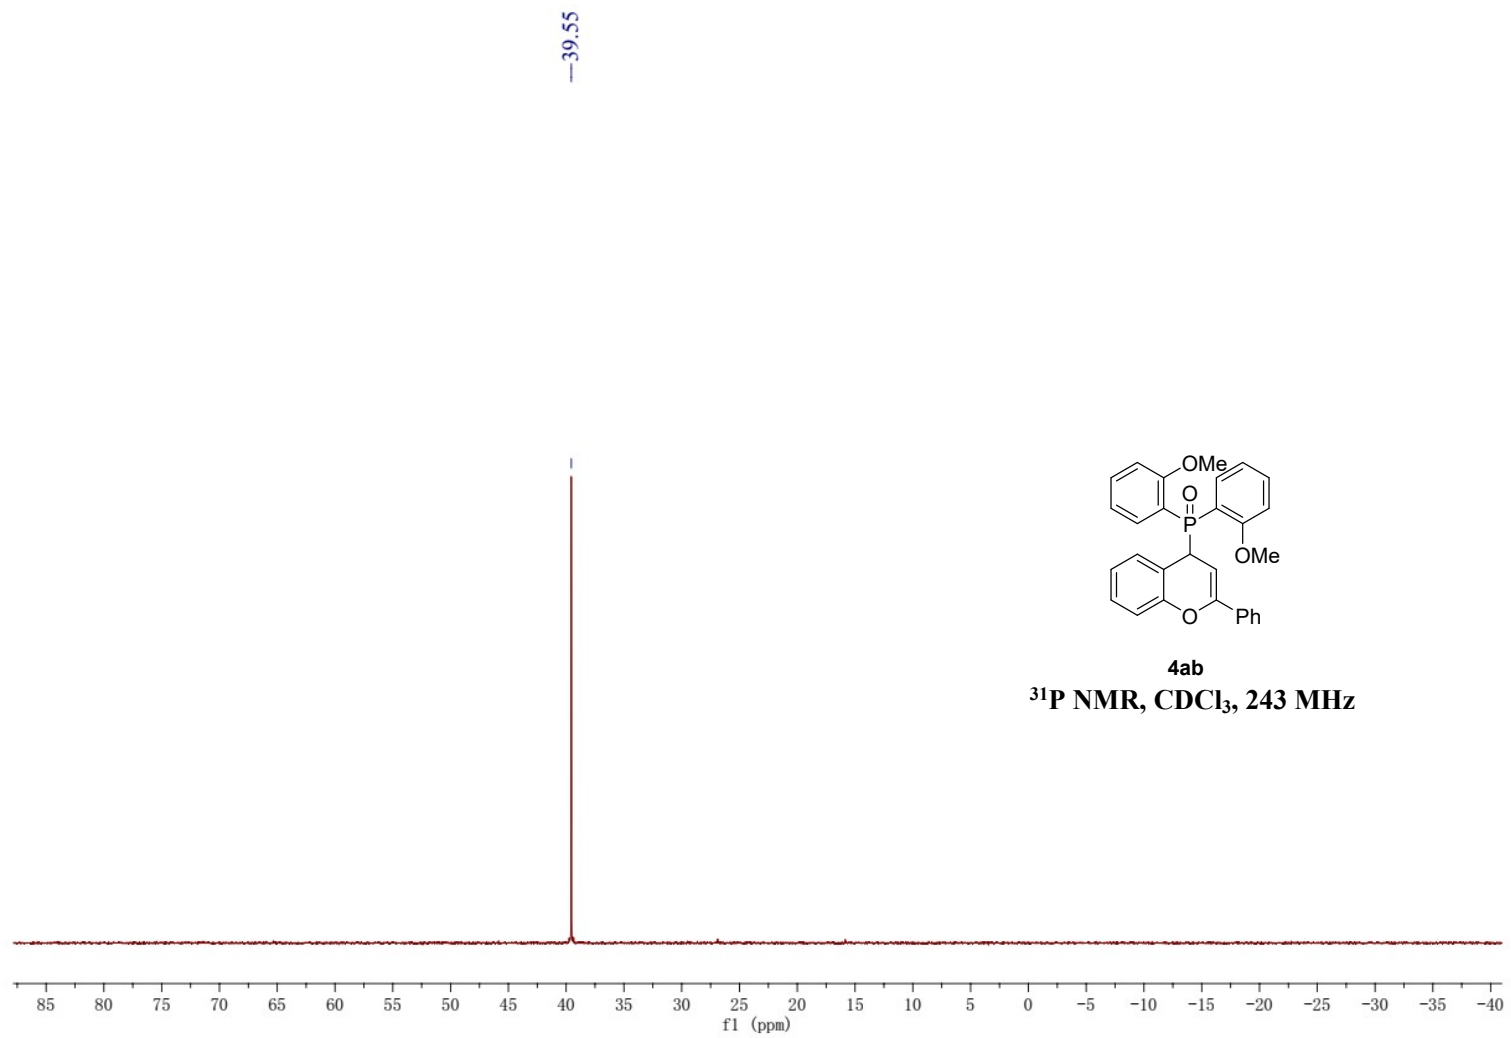

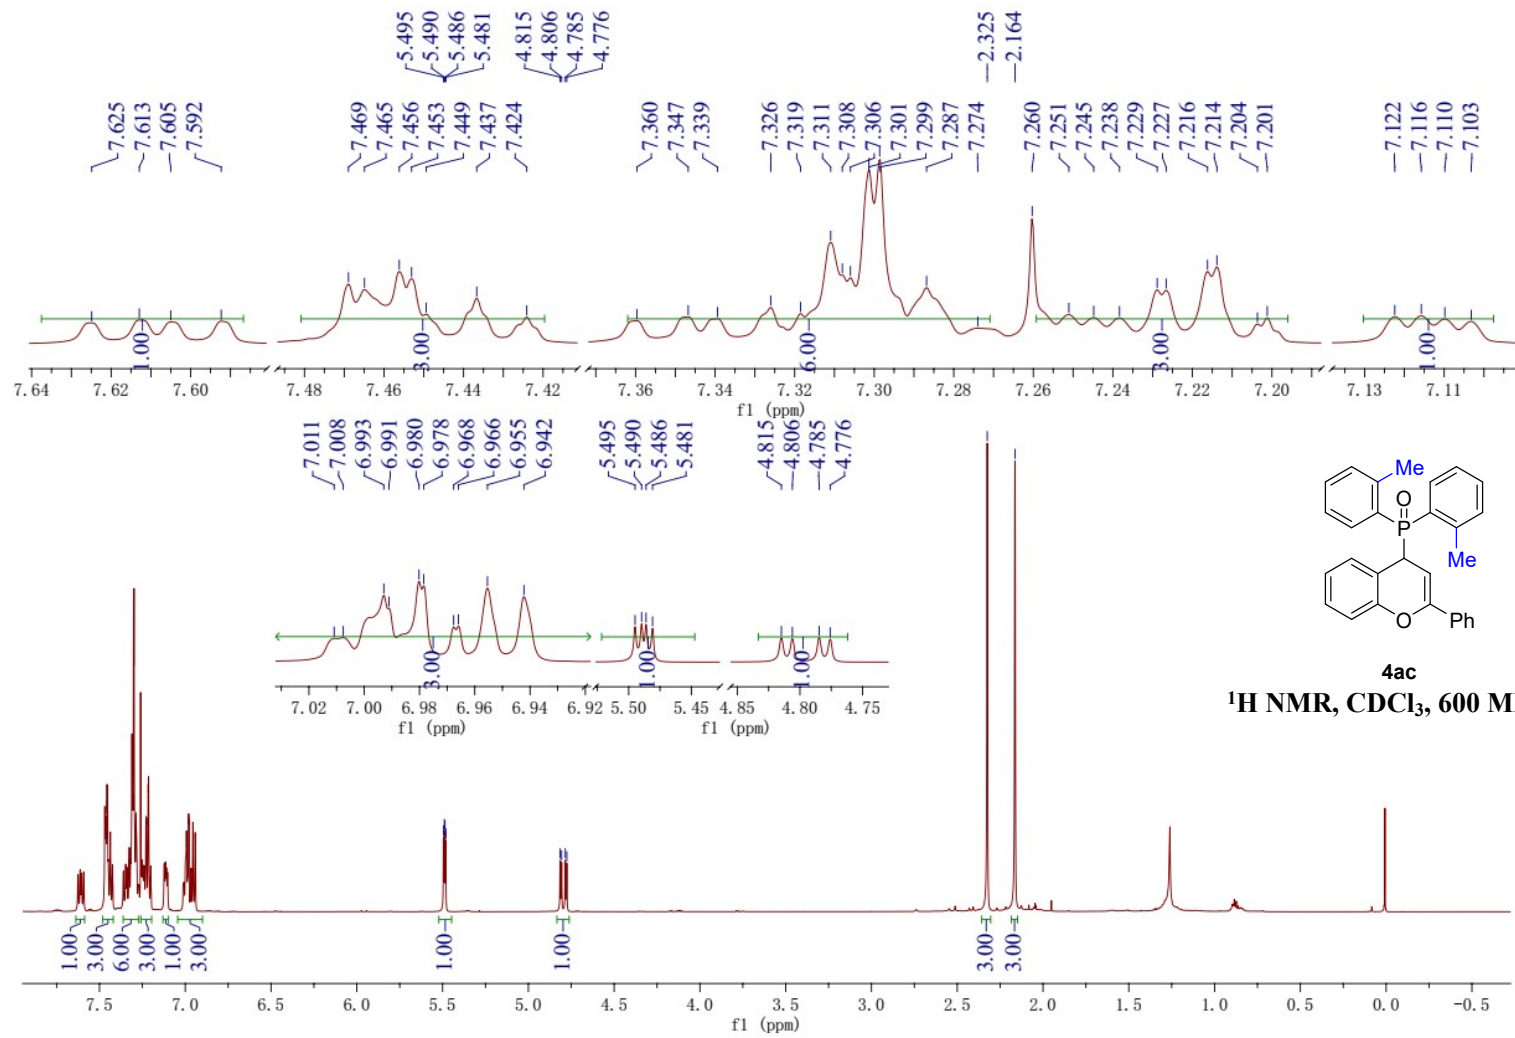

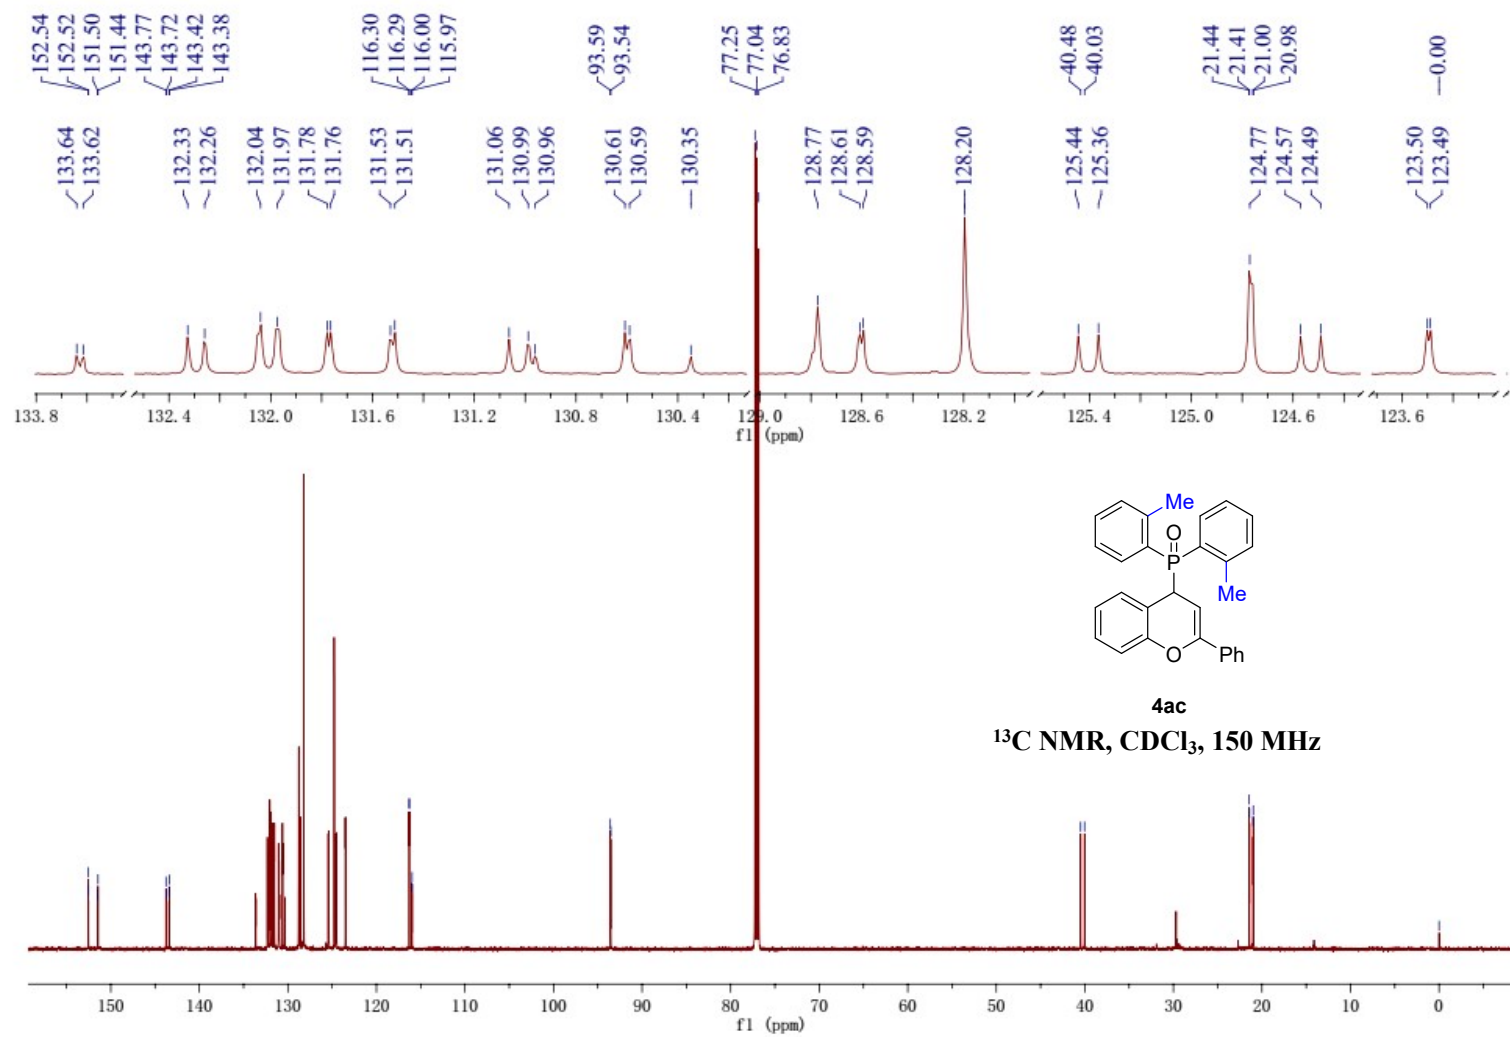

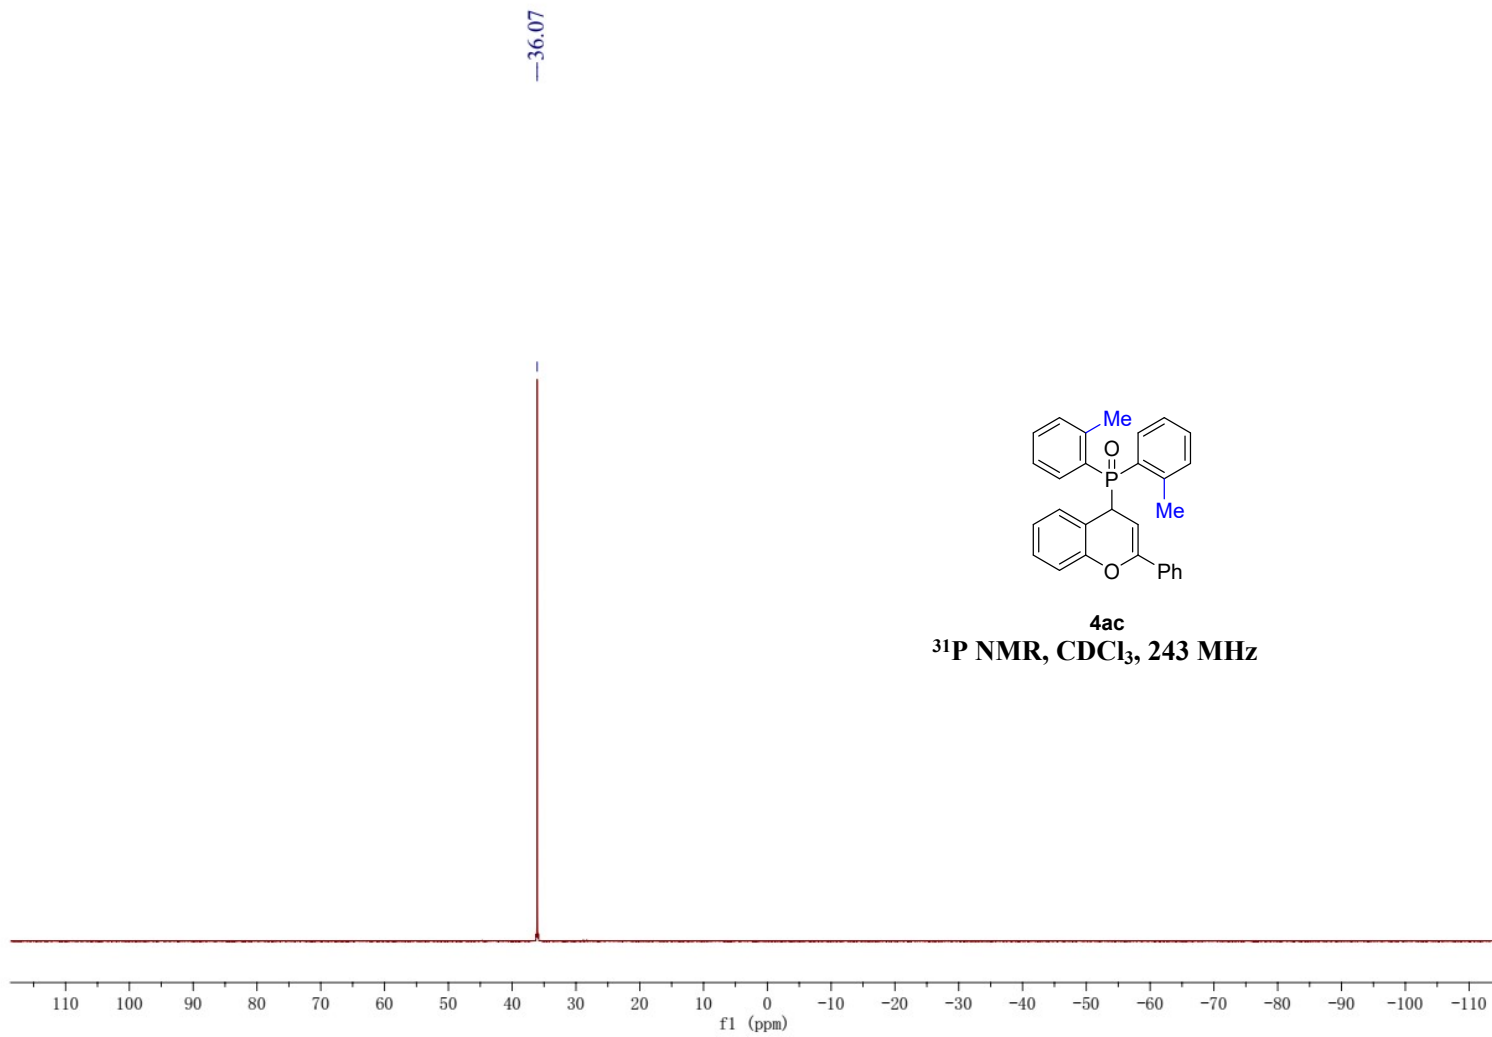



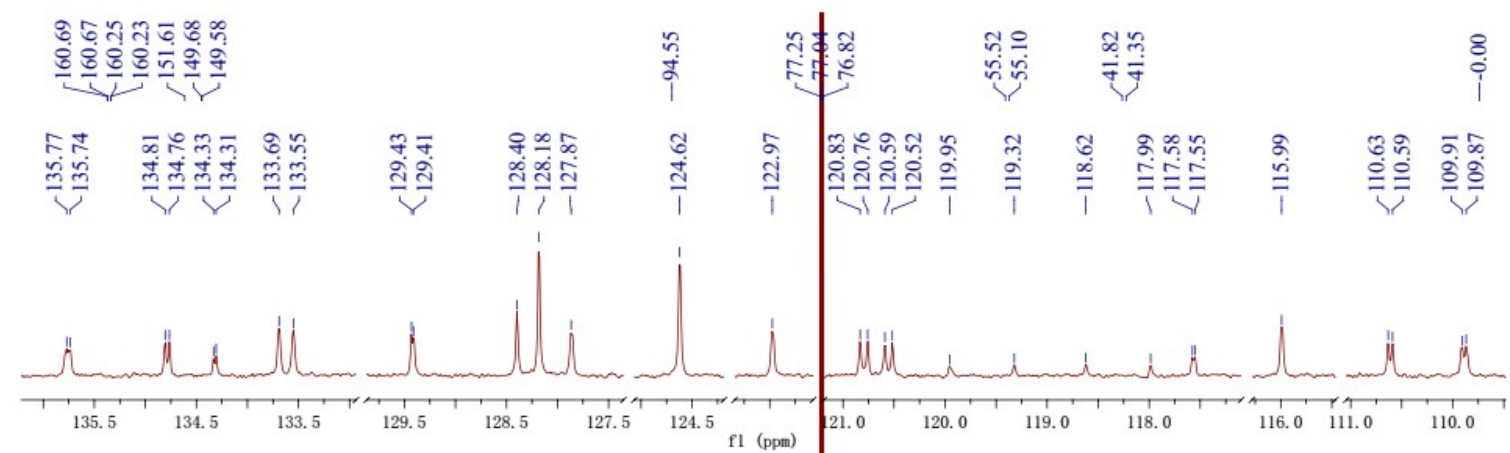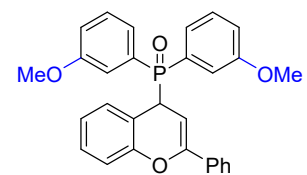

4ad

<sup>13</sup>C NMR, CDCl<sub>3</sub>, 150 MHz

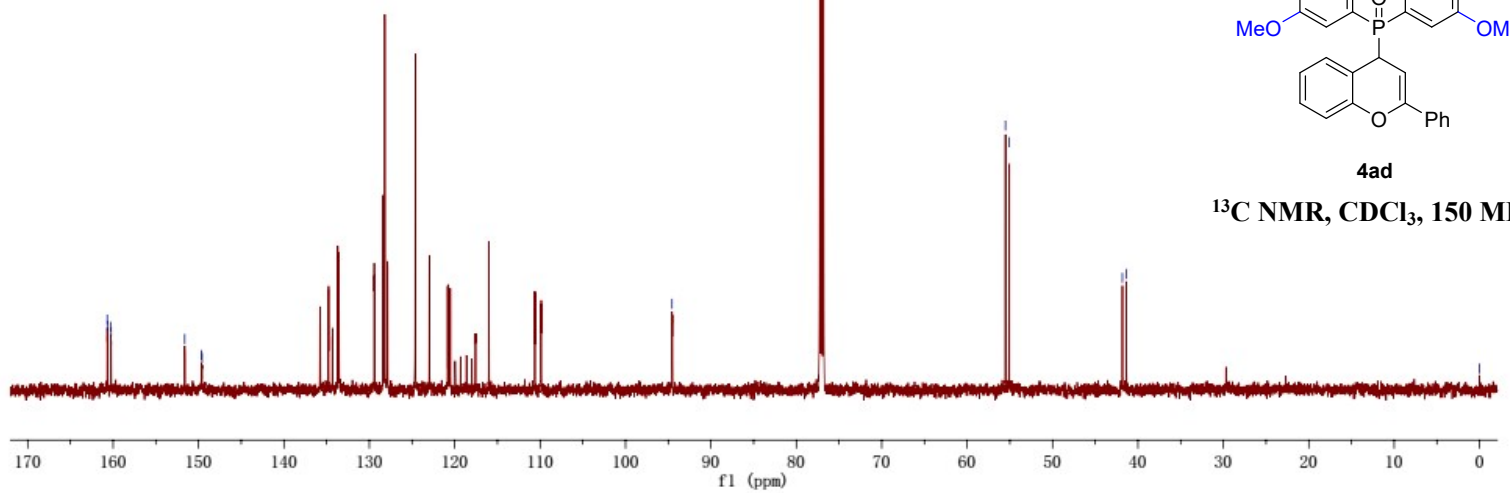

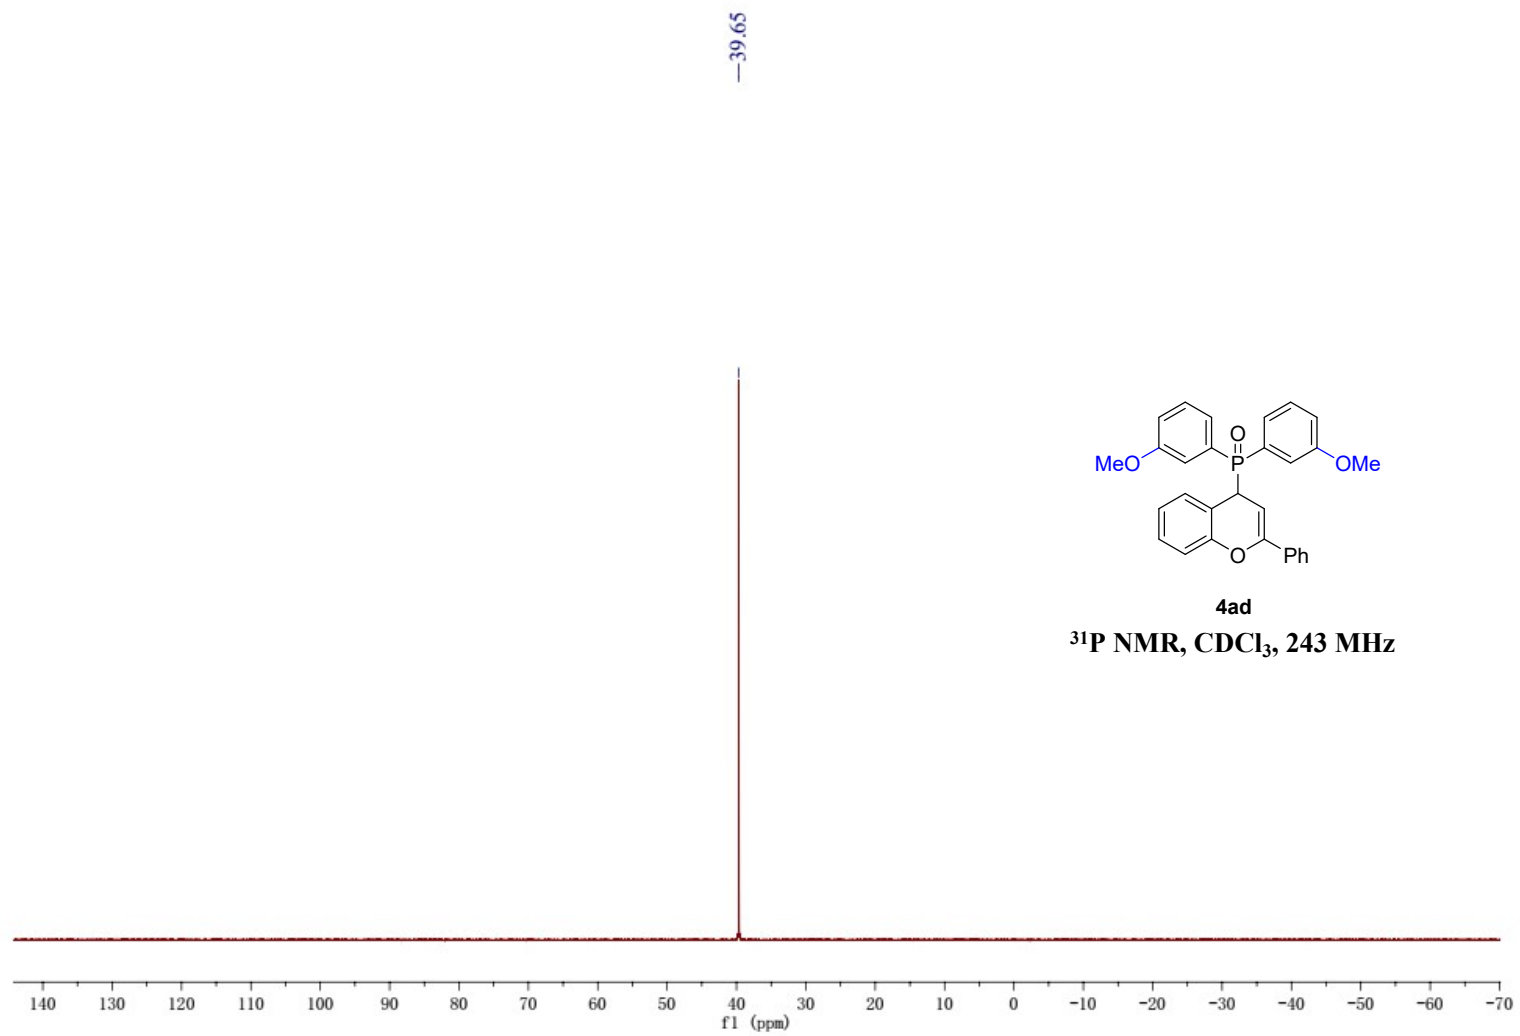



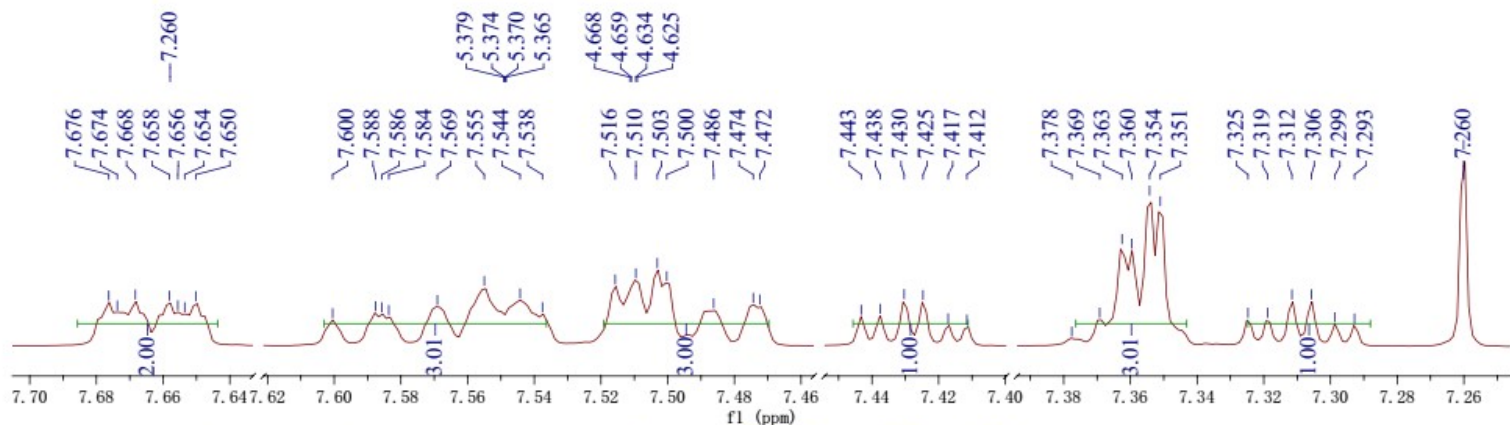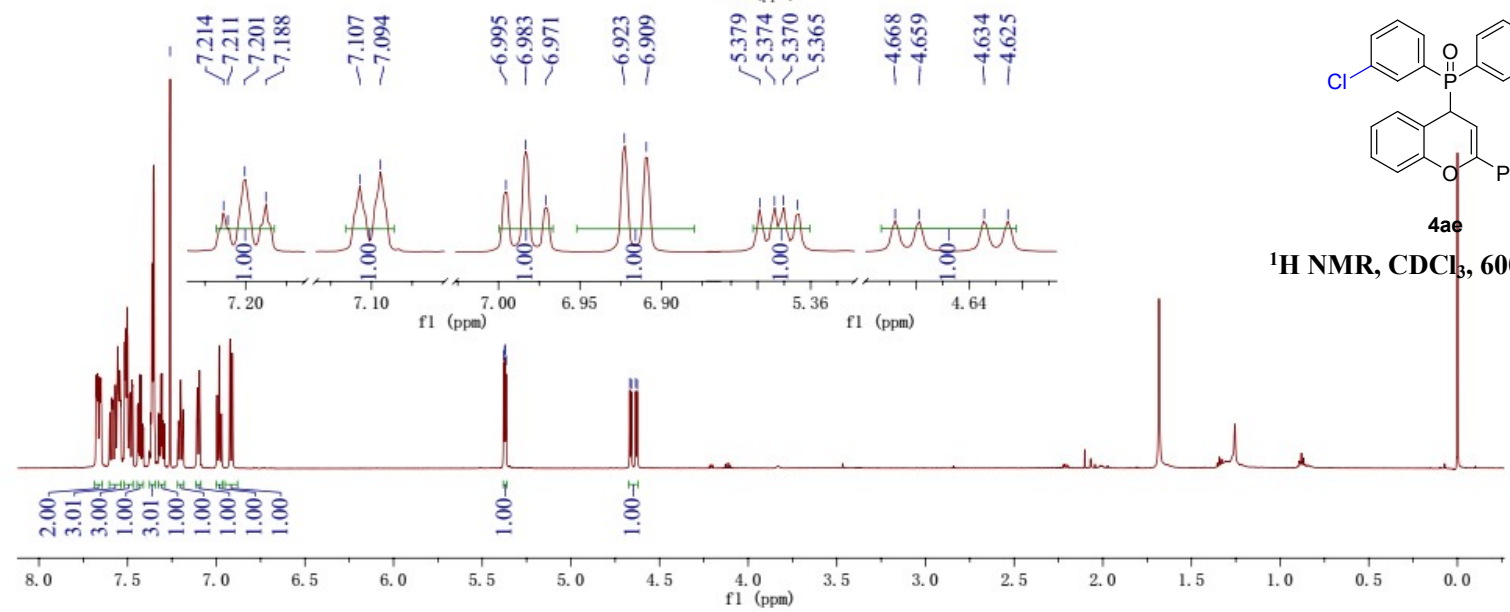

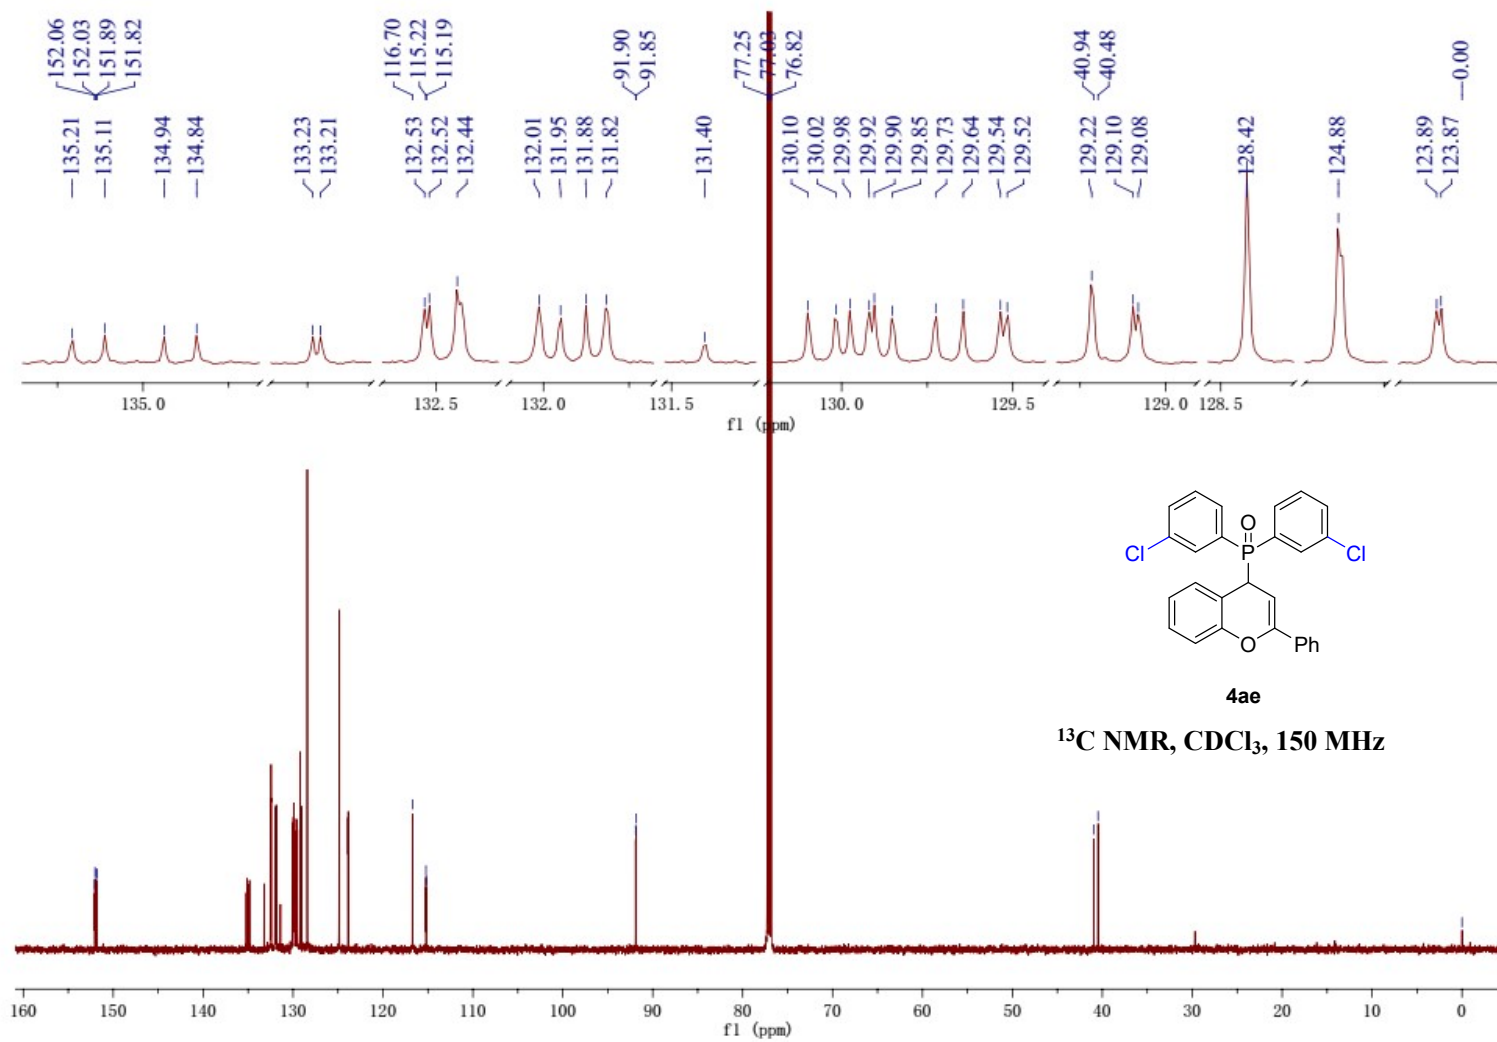

-28.28

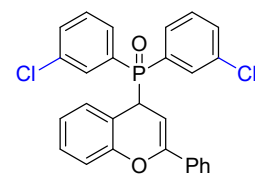

4ae

<sup>31</sup>P NMR, CDCl<sub>3</sub>, 243 MHz

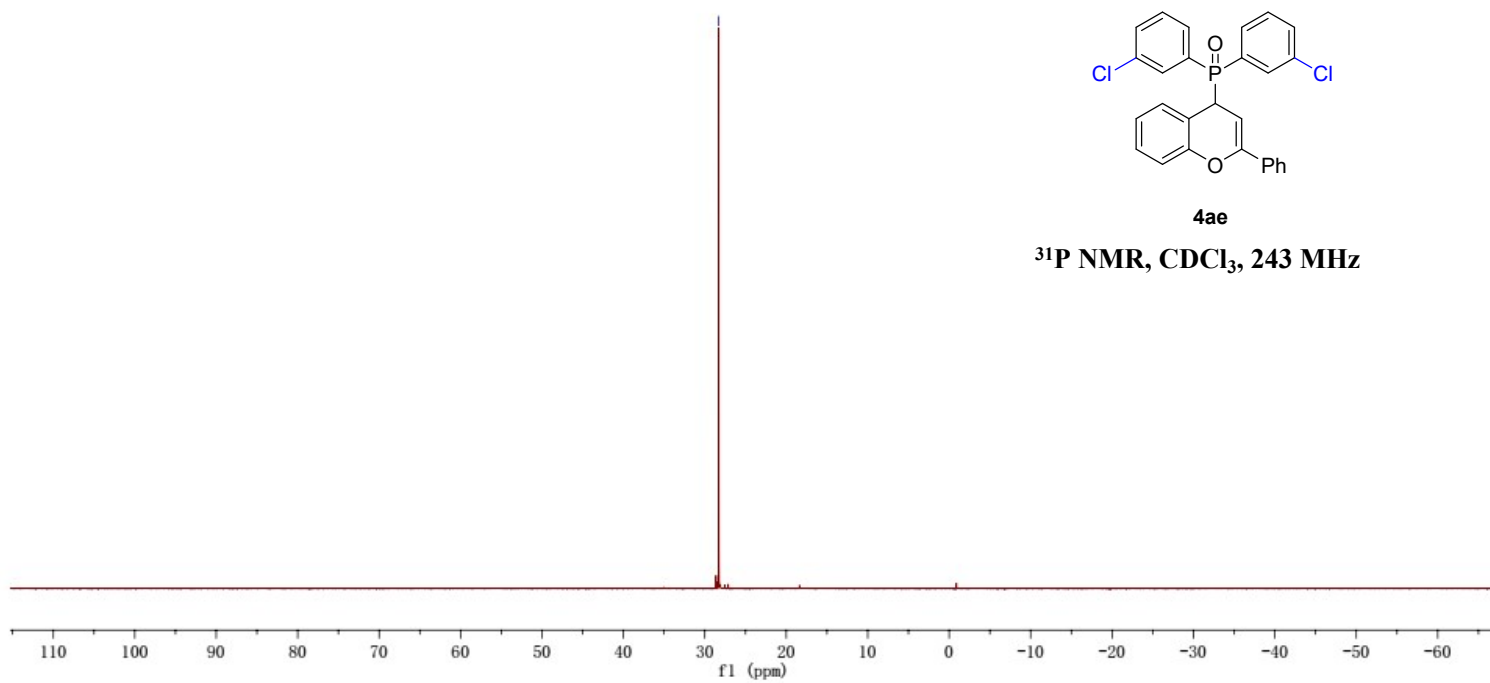

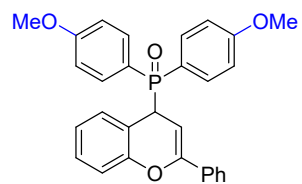

**4af**

**<sup>1</sup>H NMR, CDCl<sub>3</sub>, 600 MHz**

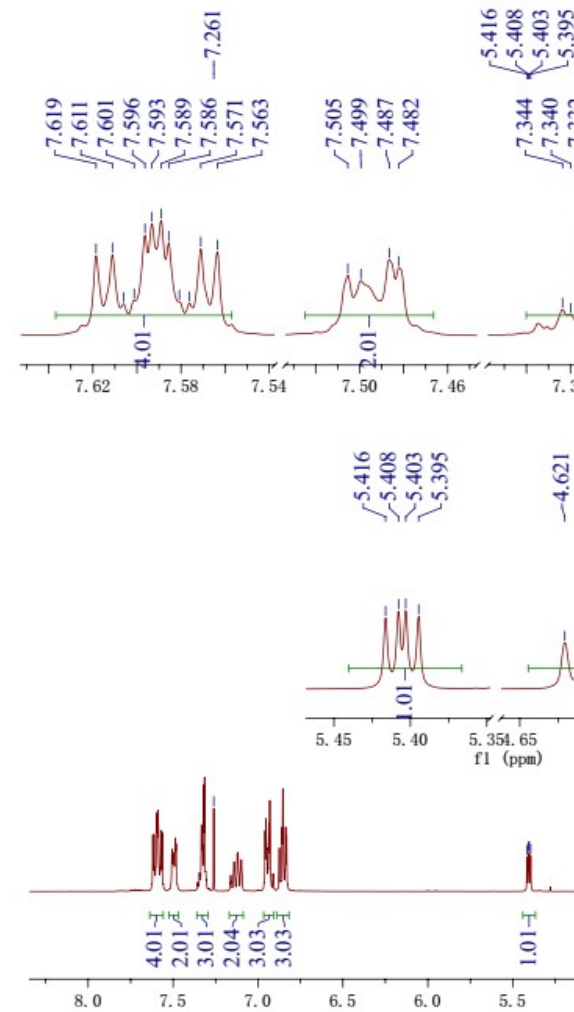

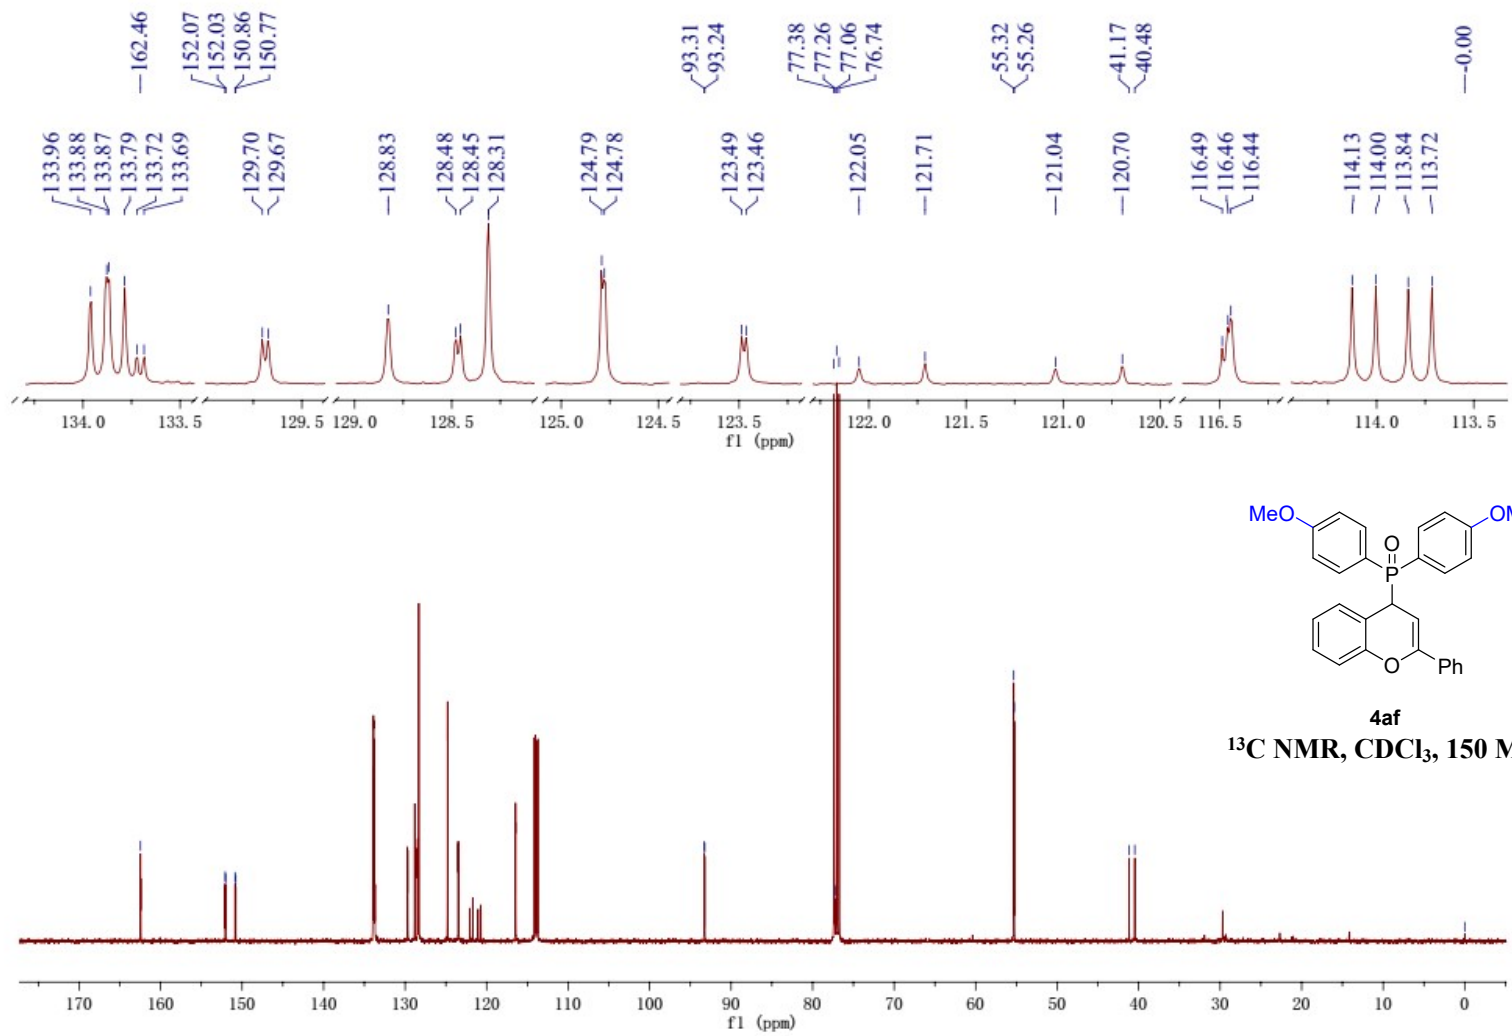

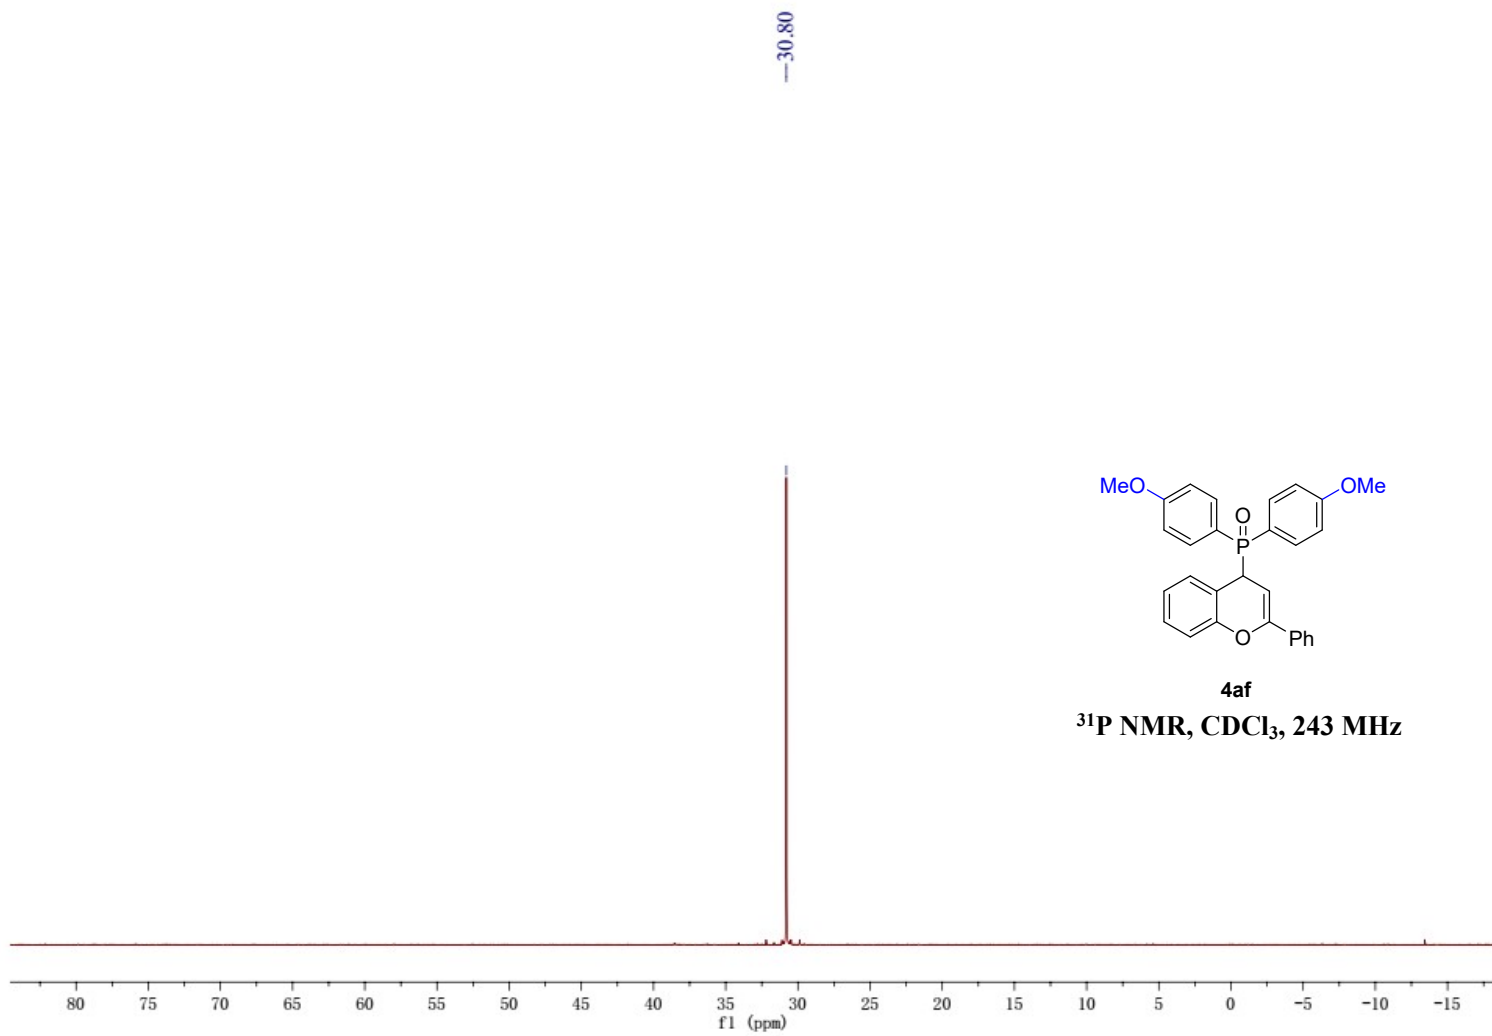

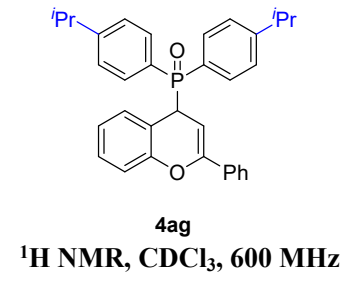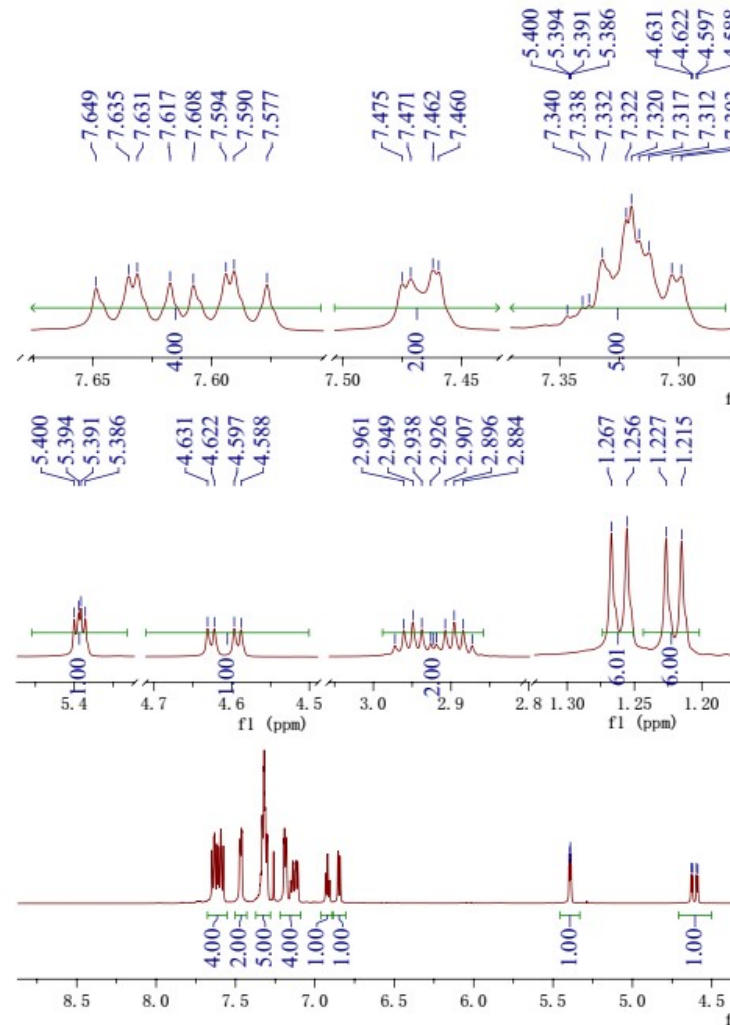

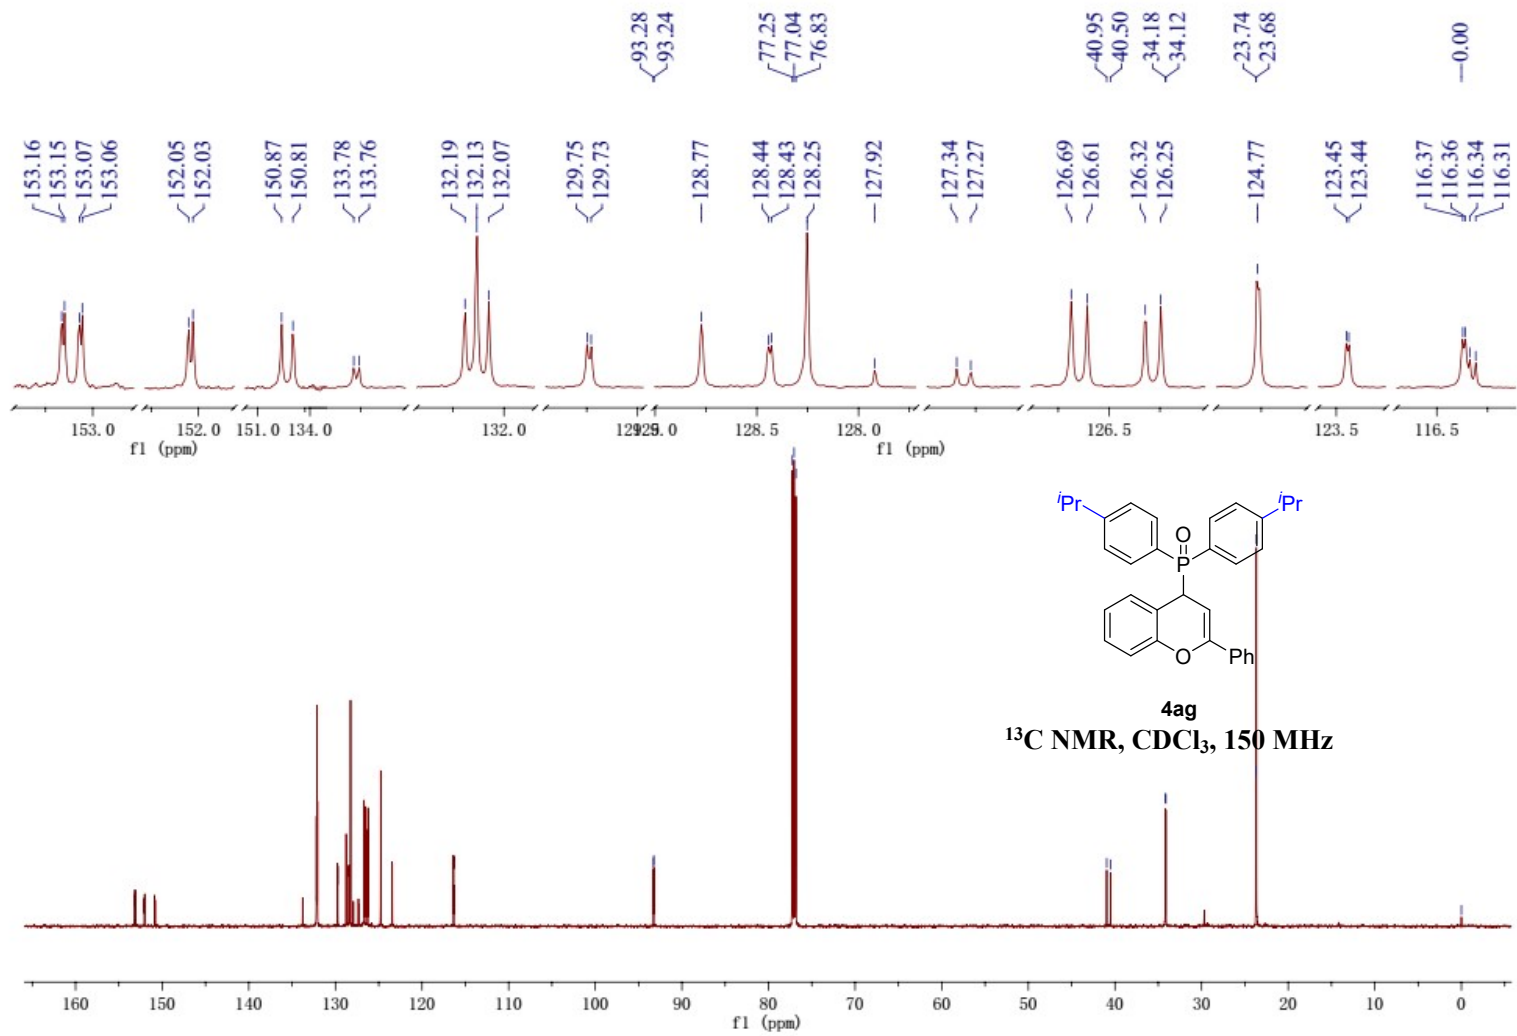



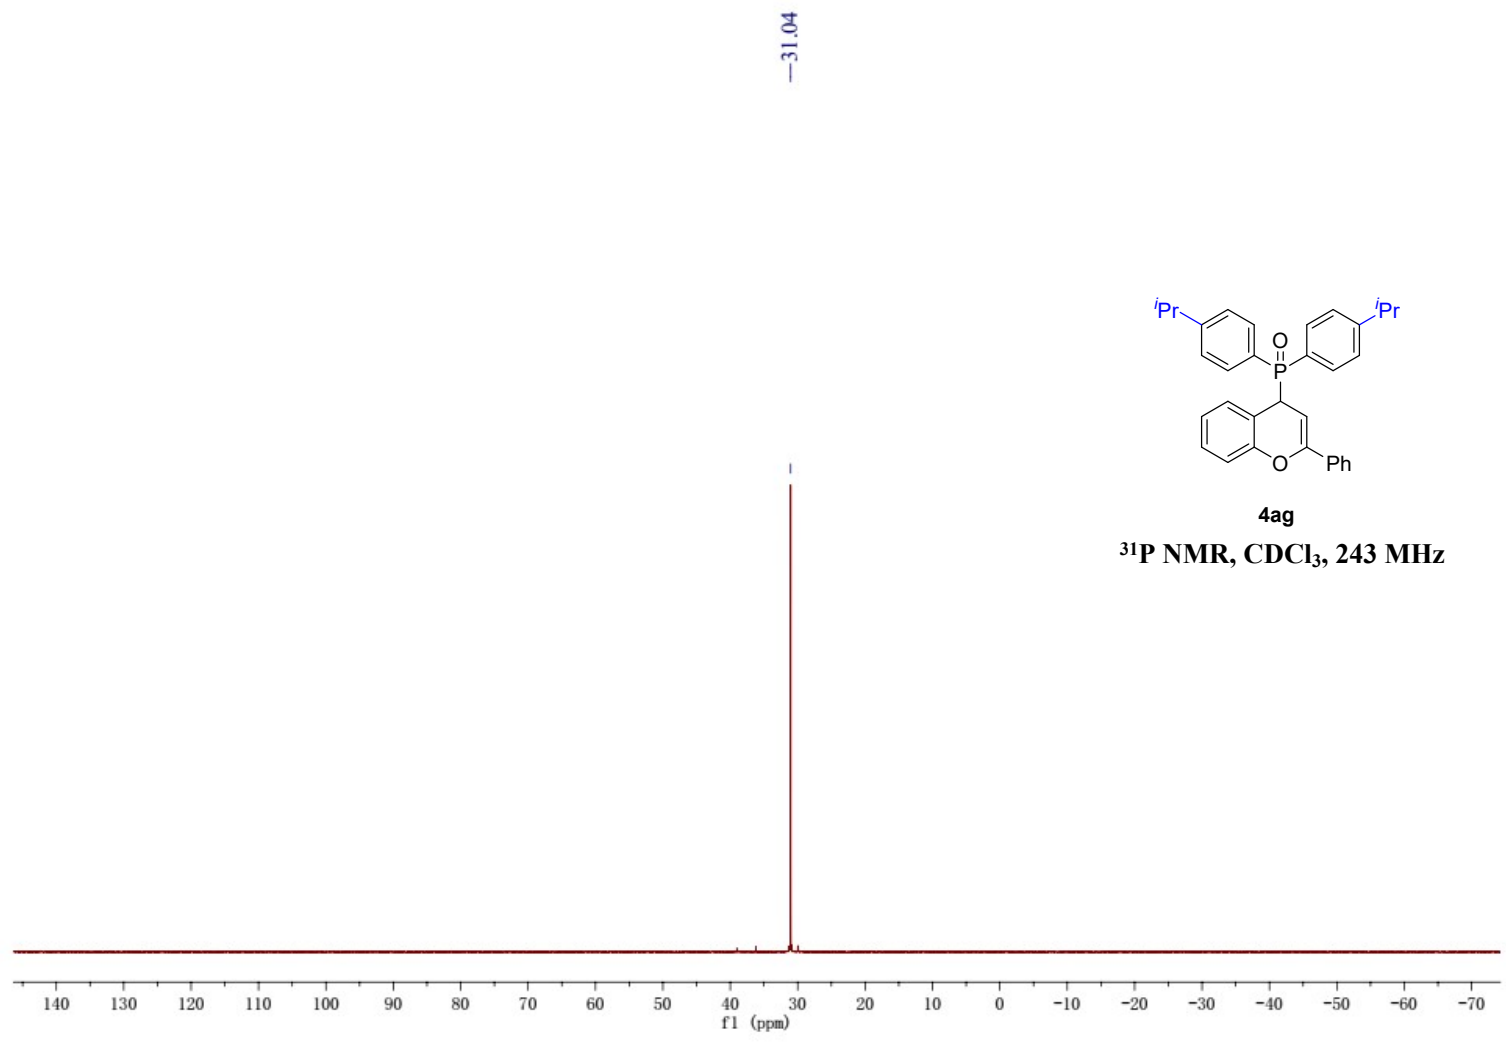

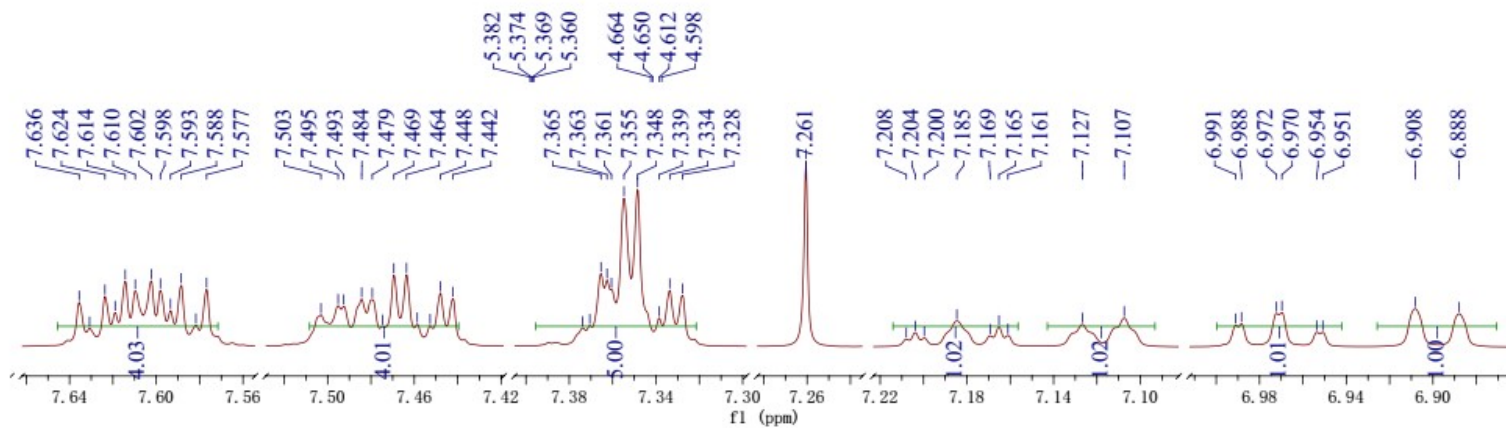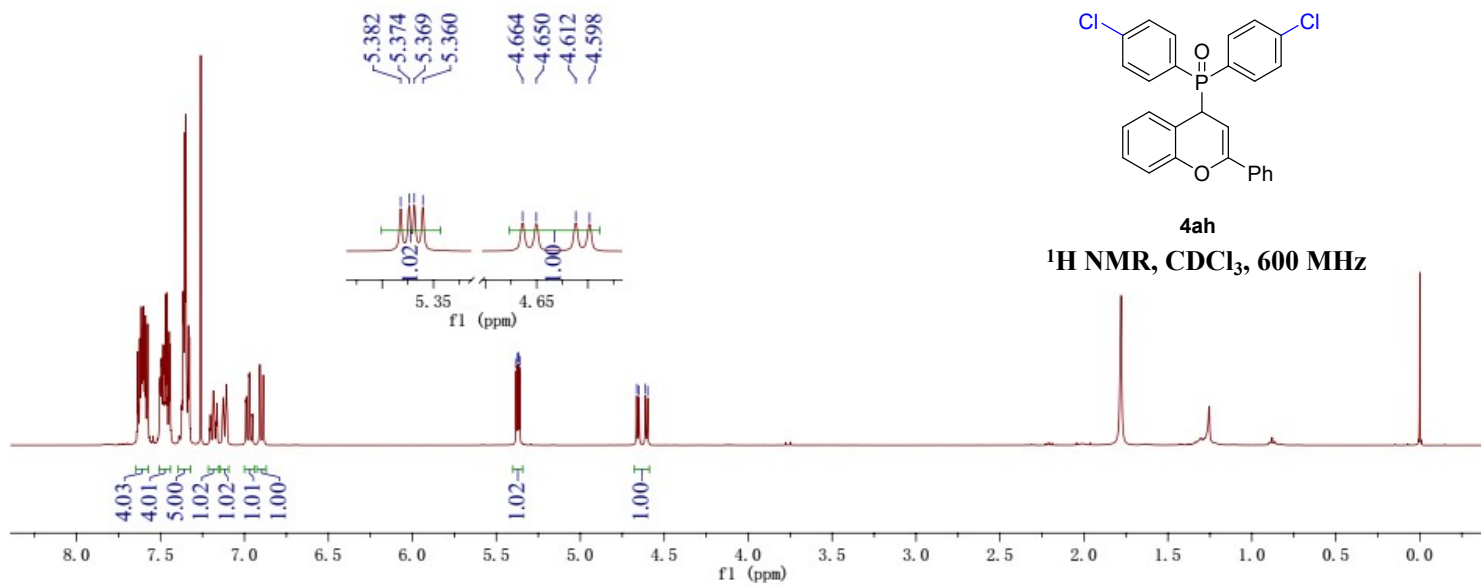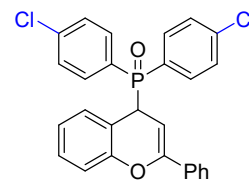

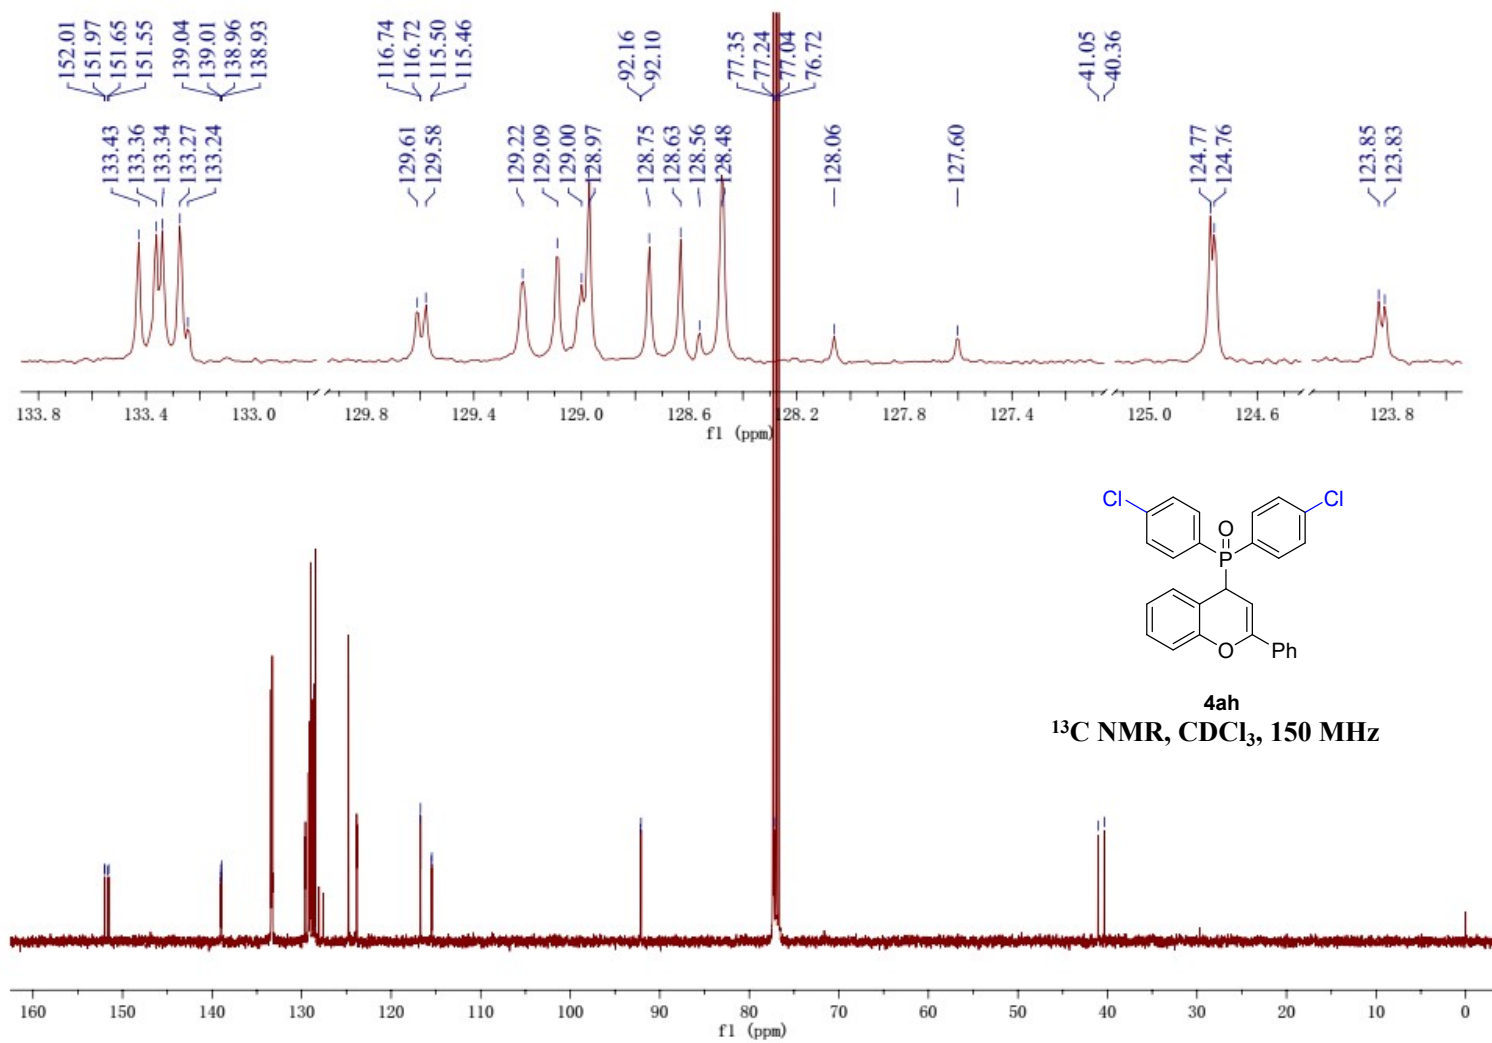

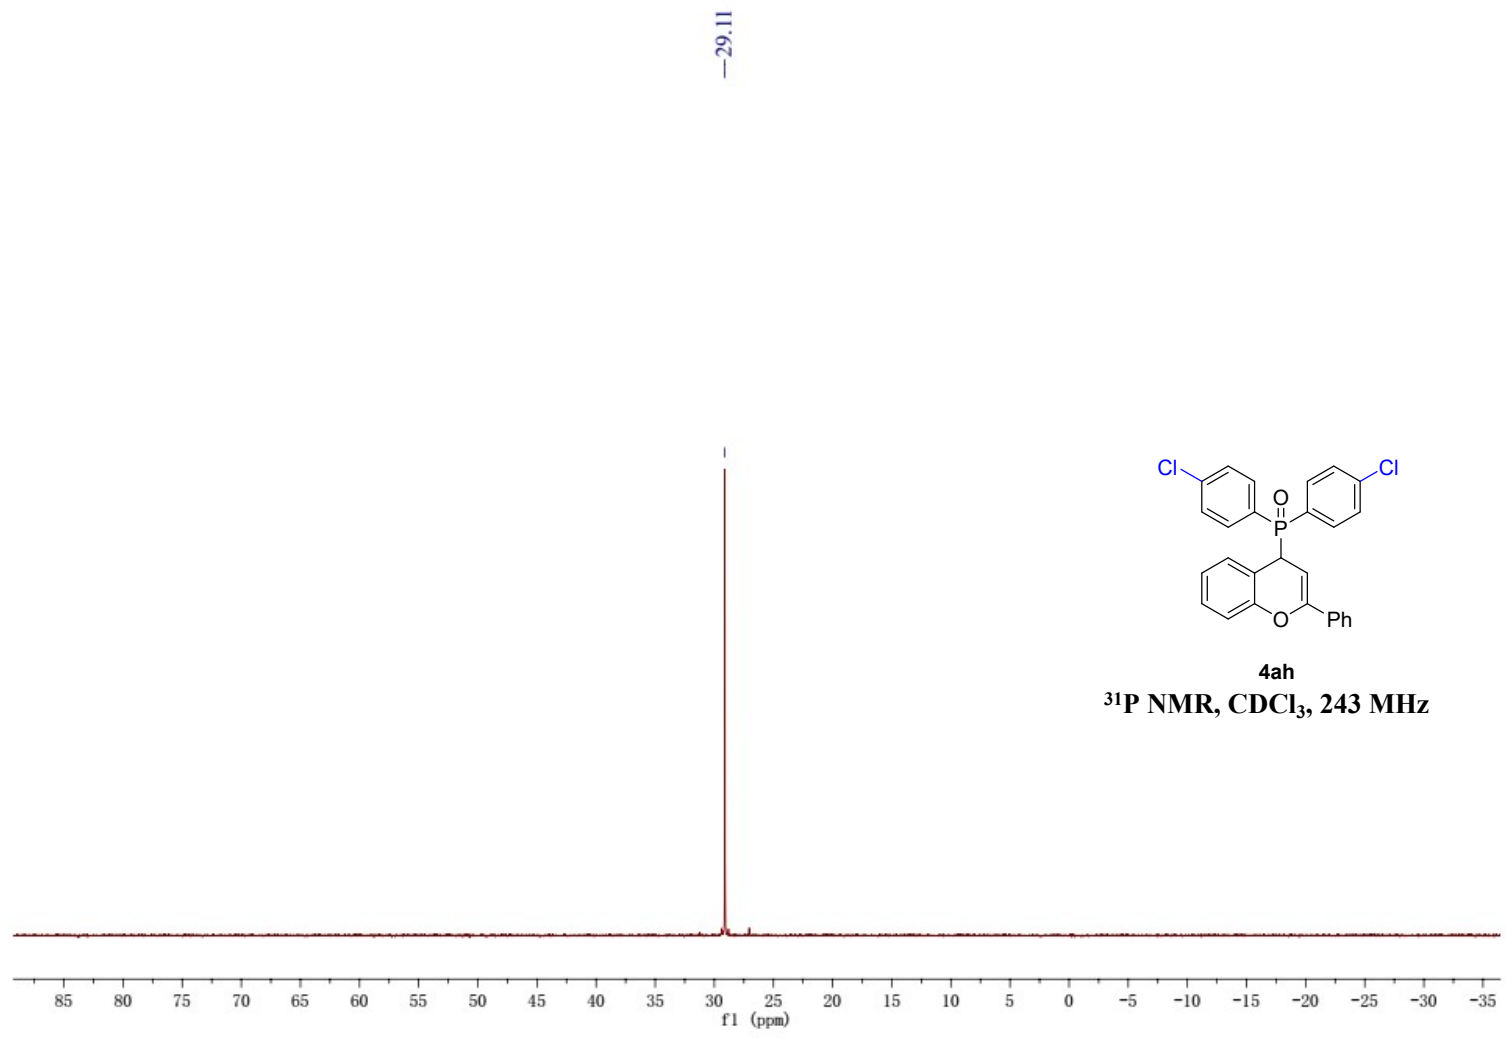

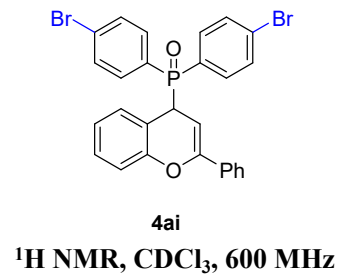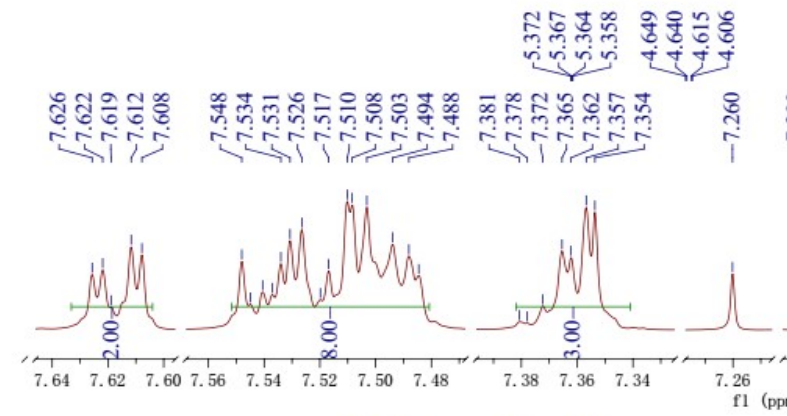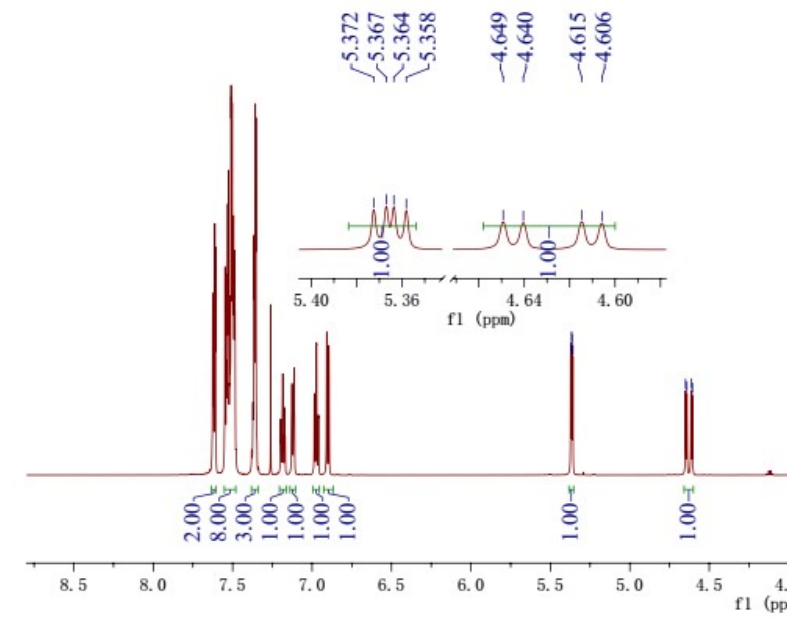

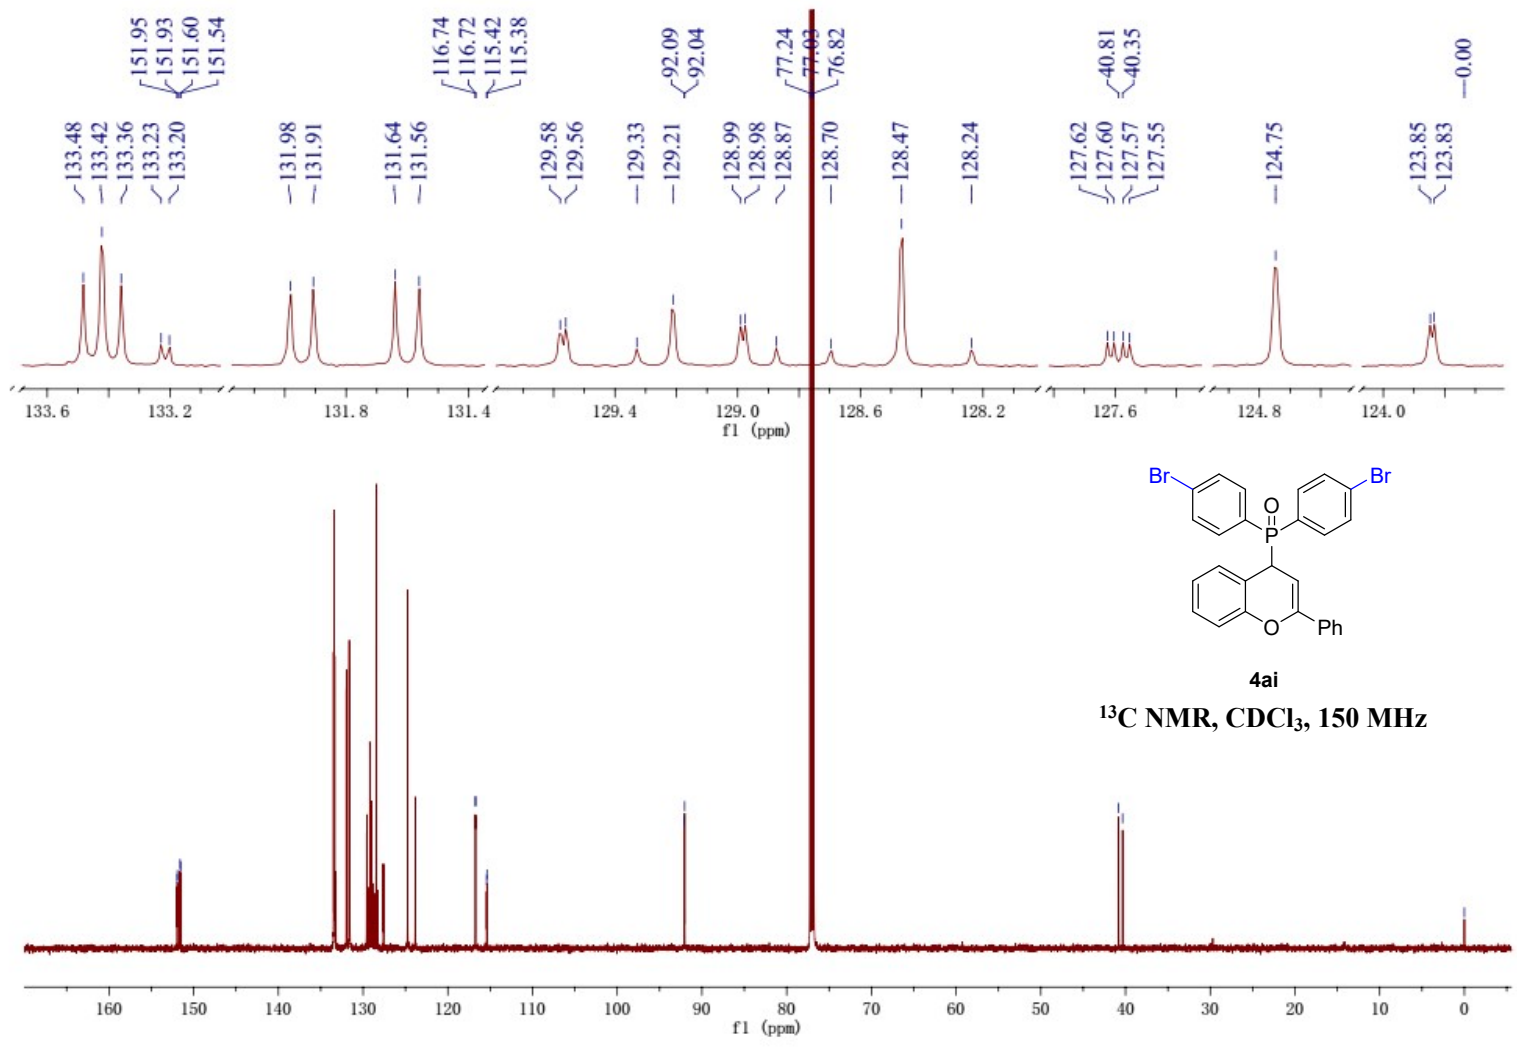

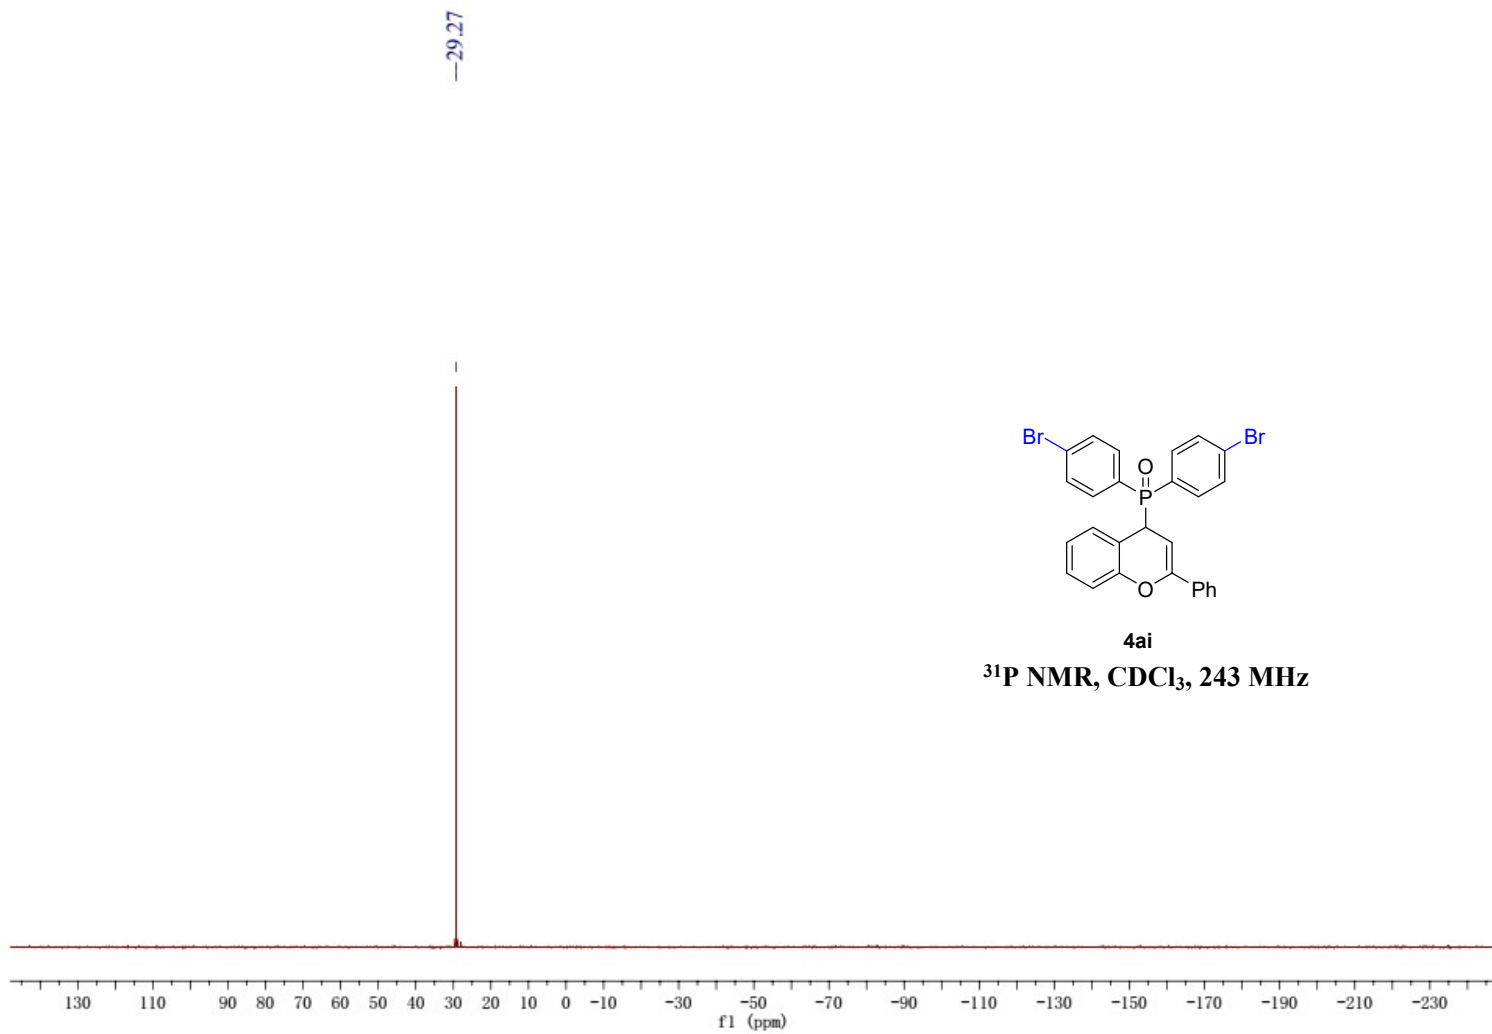

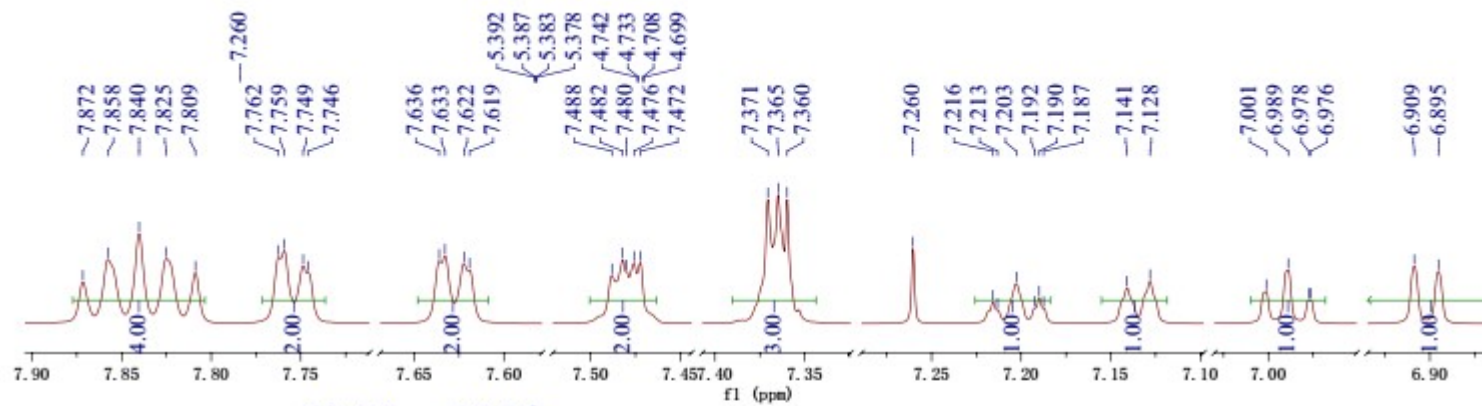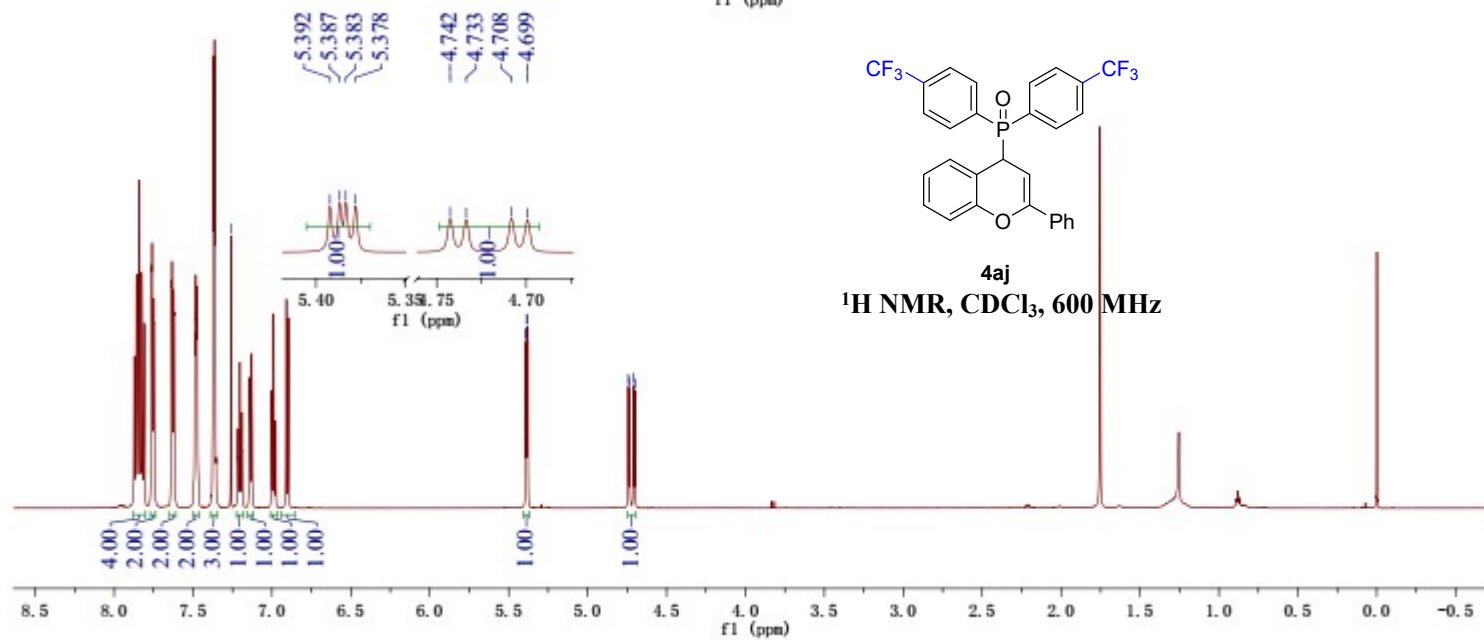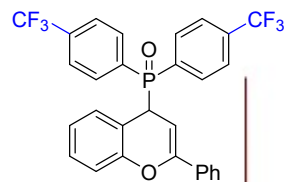

4aj  
<sup>1</sup>H NMR, CDCl<sub>3</sub>, 600 MHz



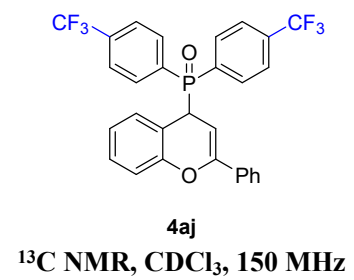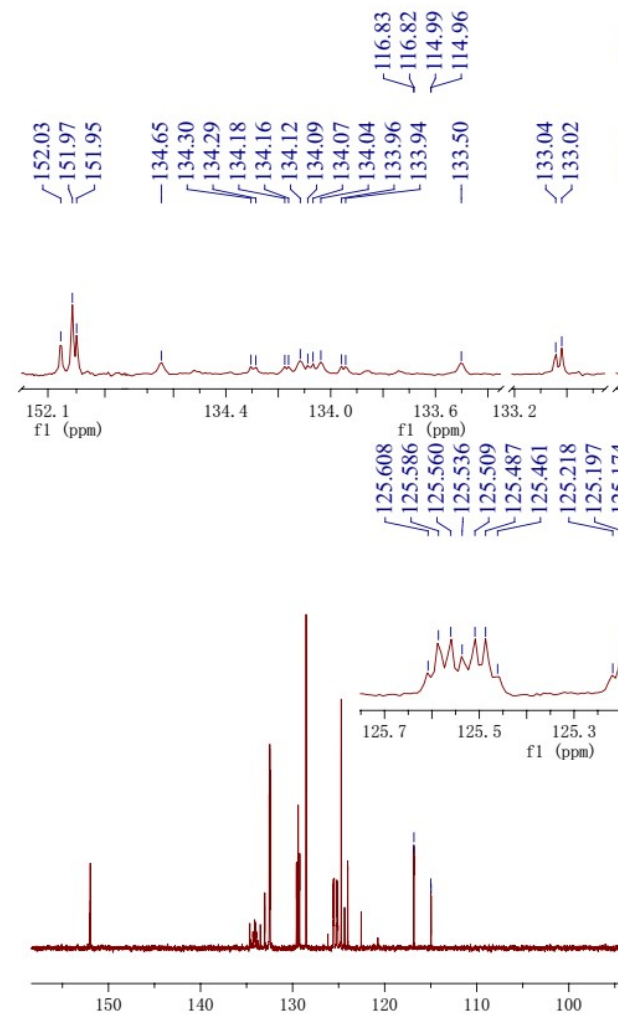

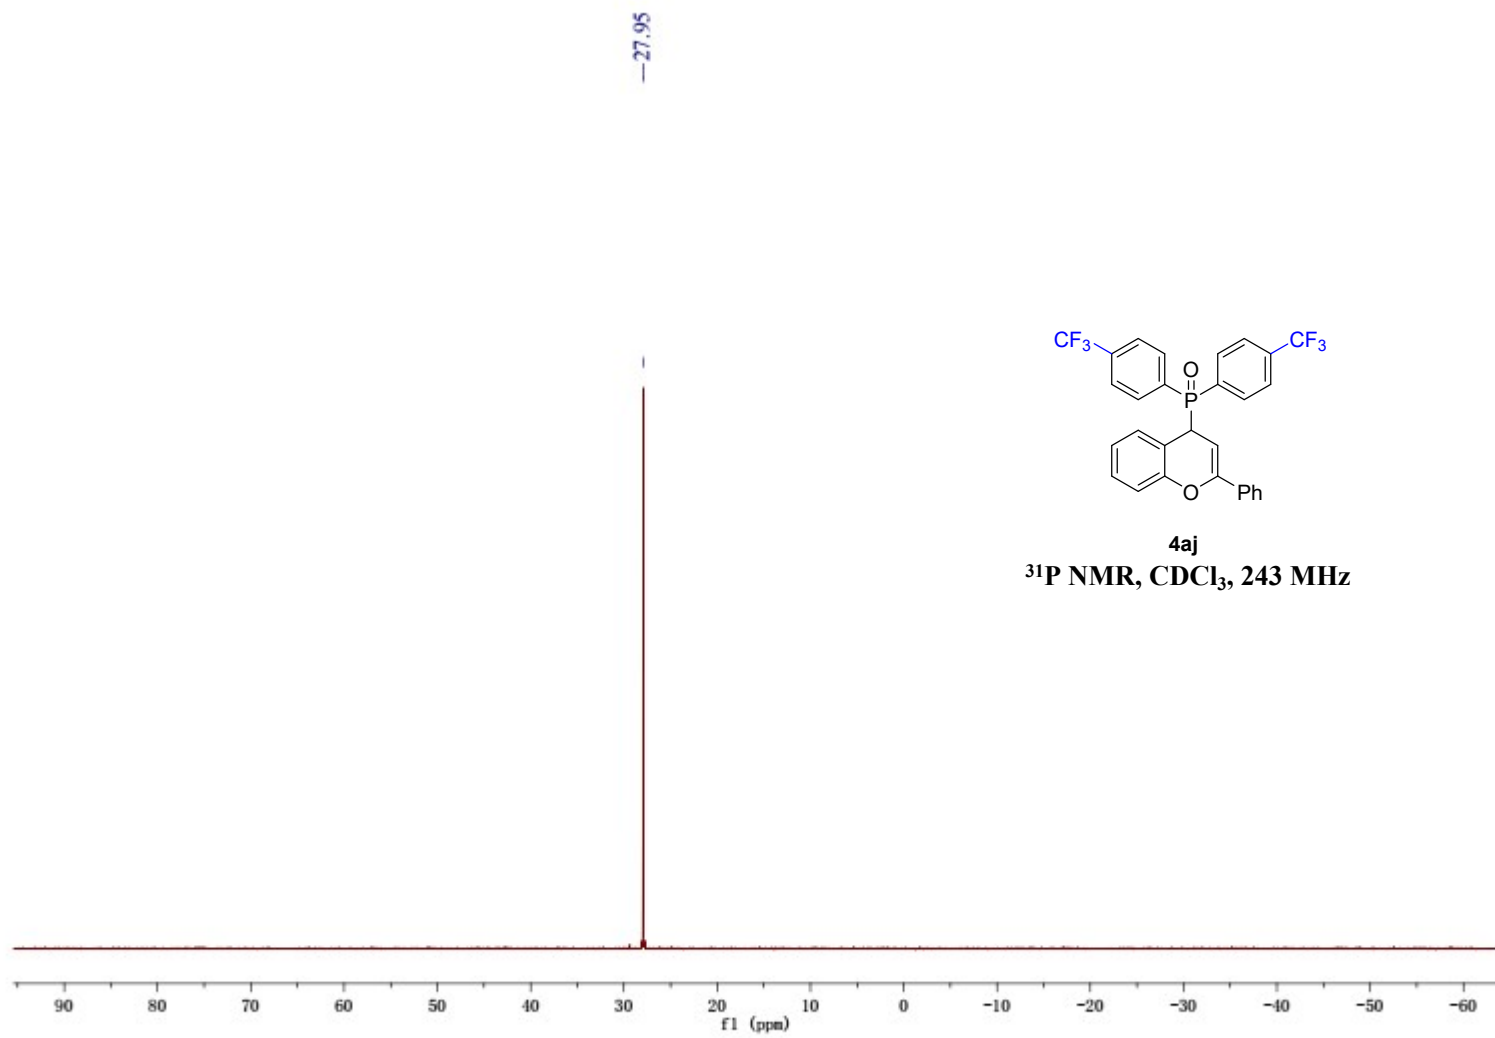

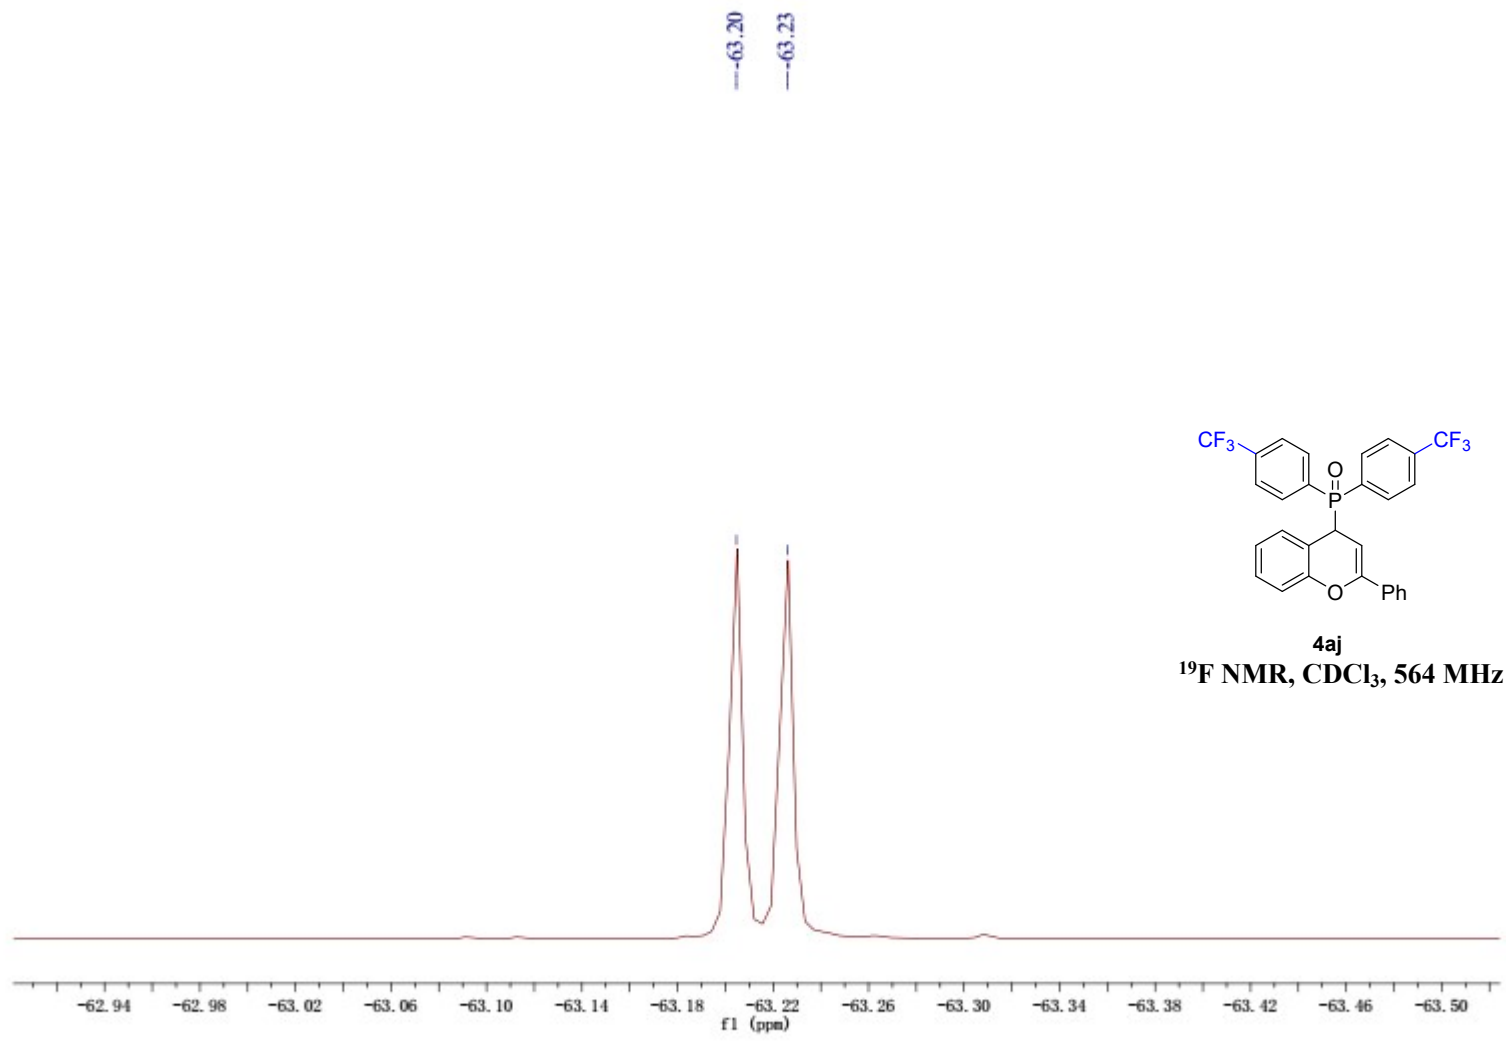



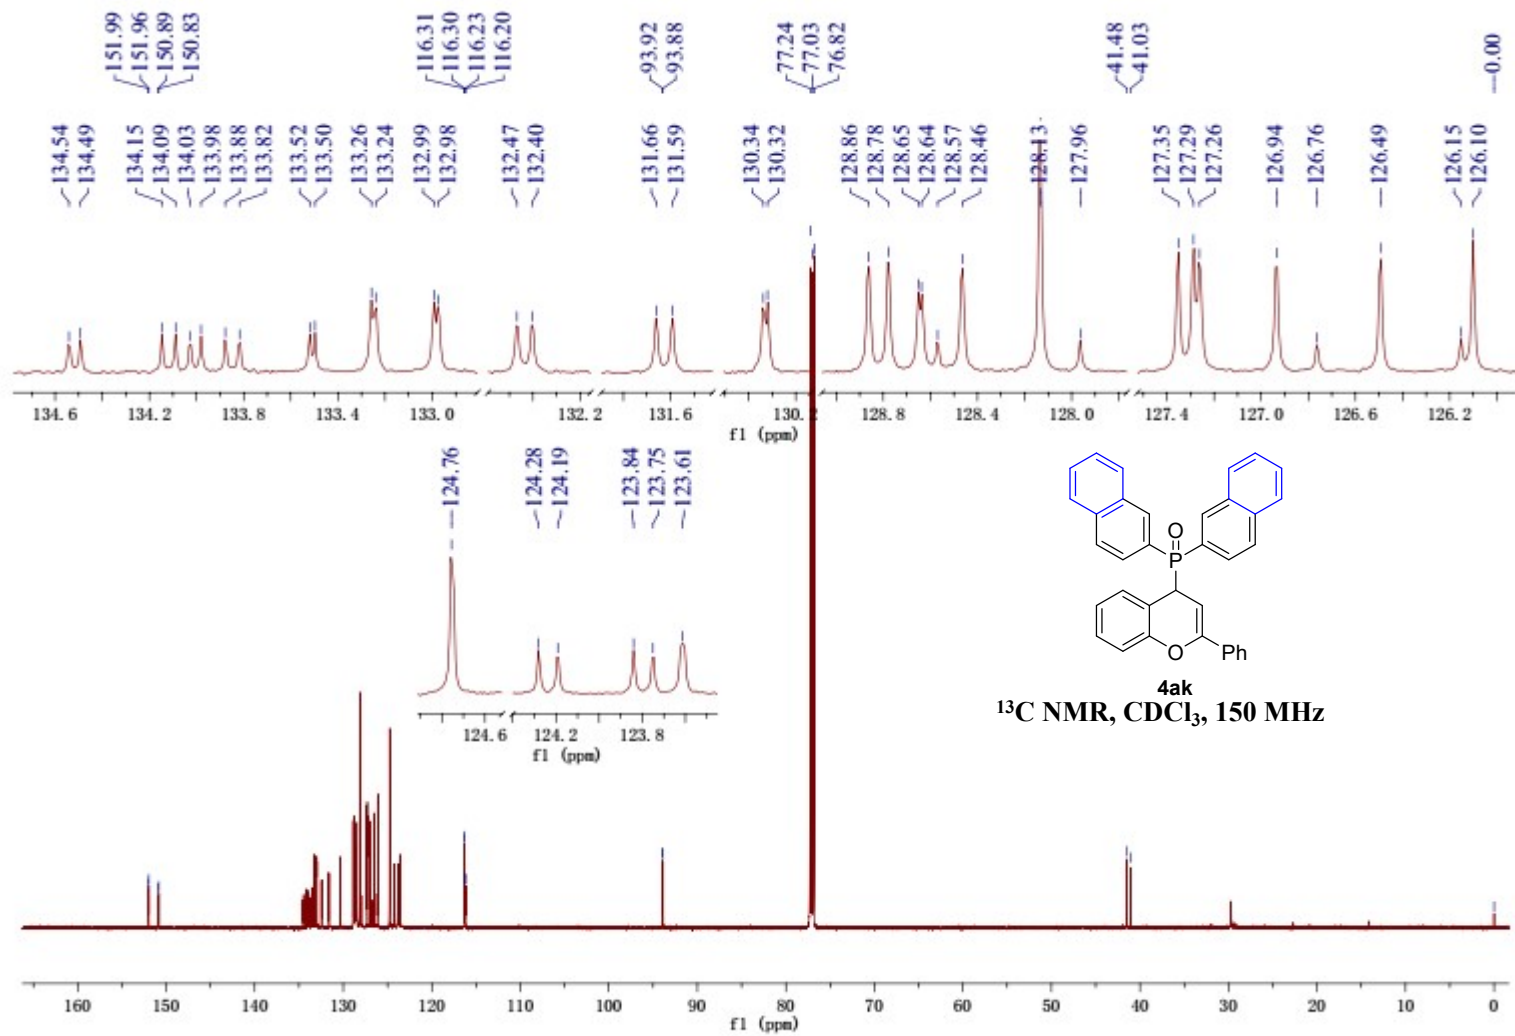

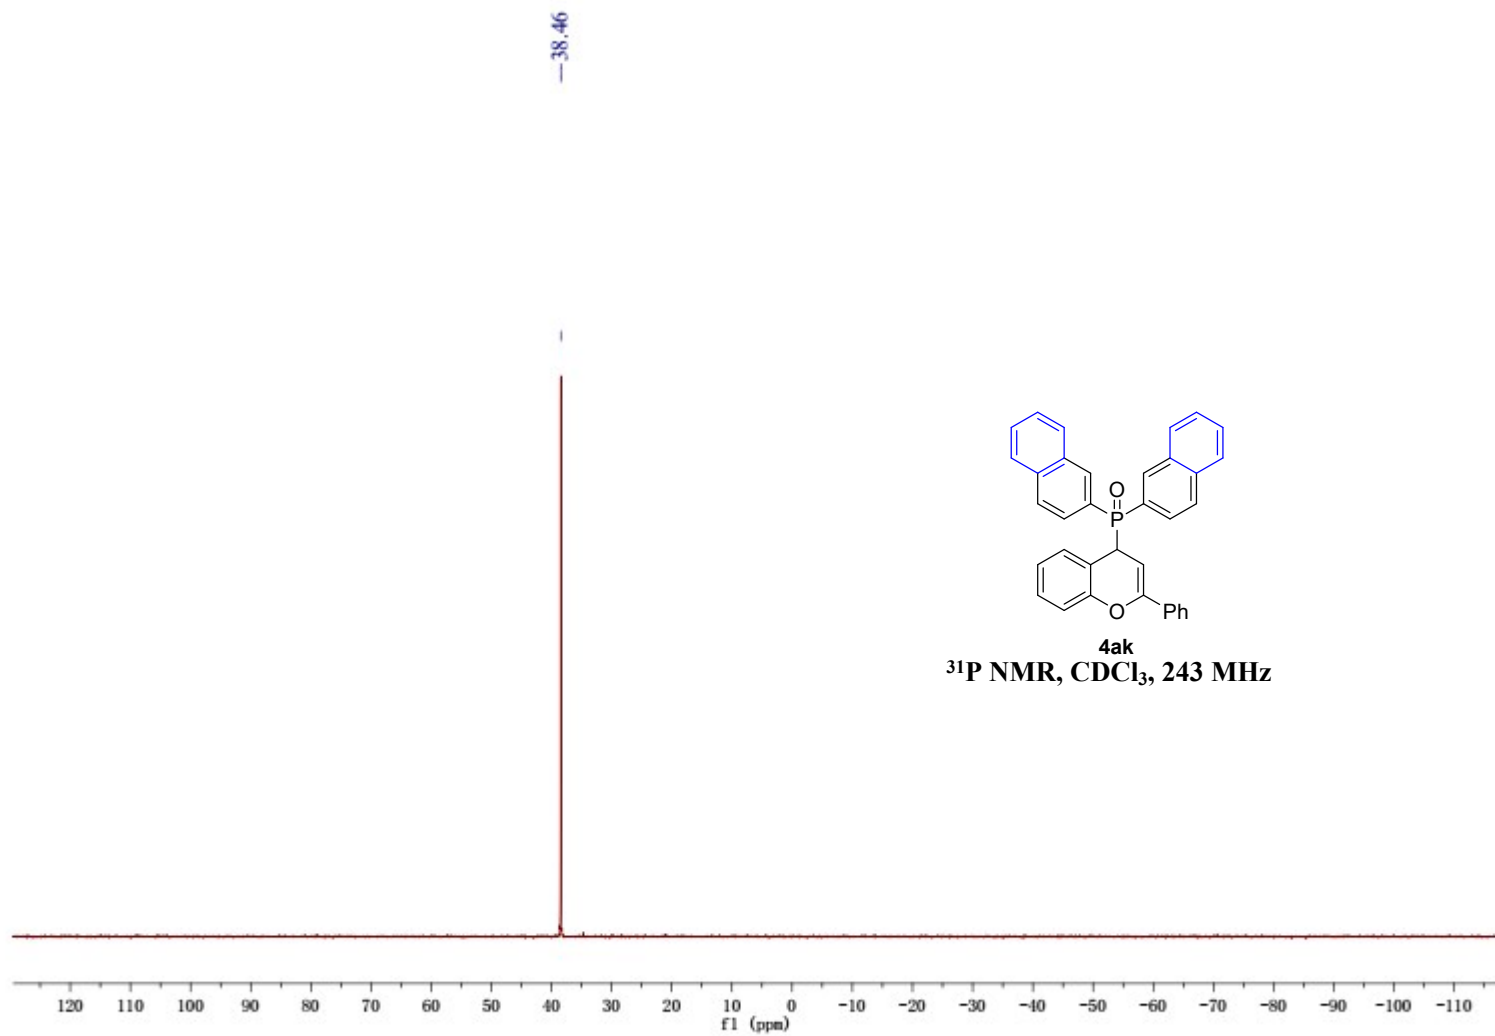

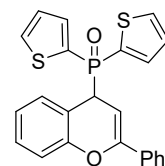

**4al**

**<sup>1</sup>H NMR, CDCl<sub>3</sub>, 400 MHz**

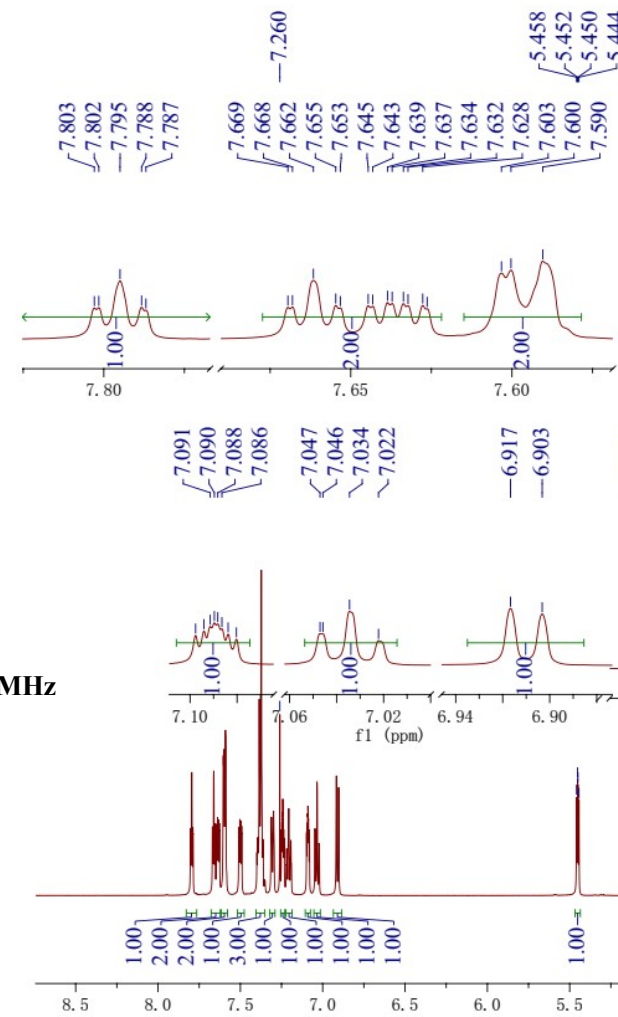

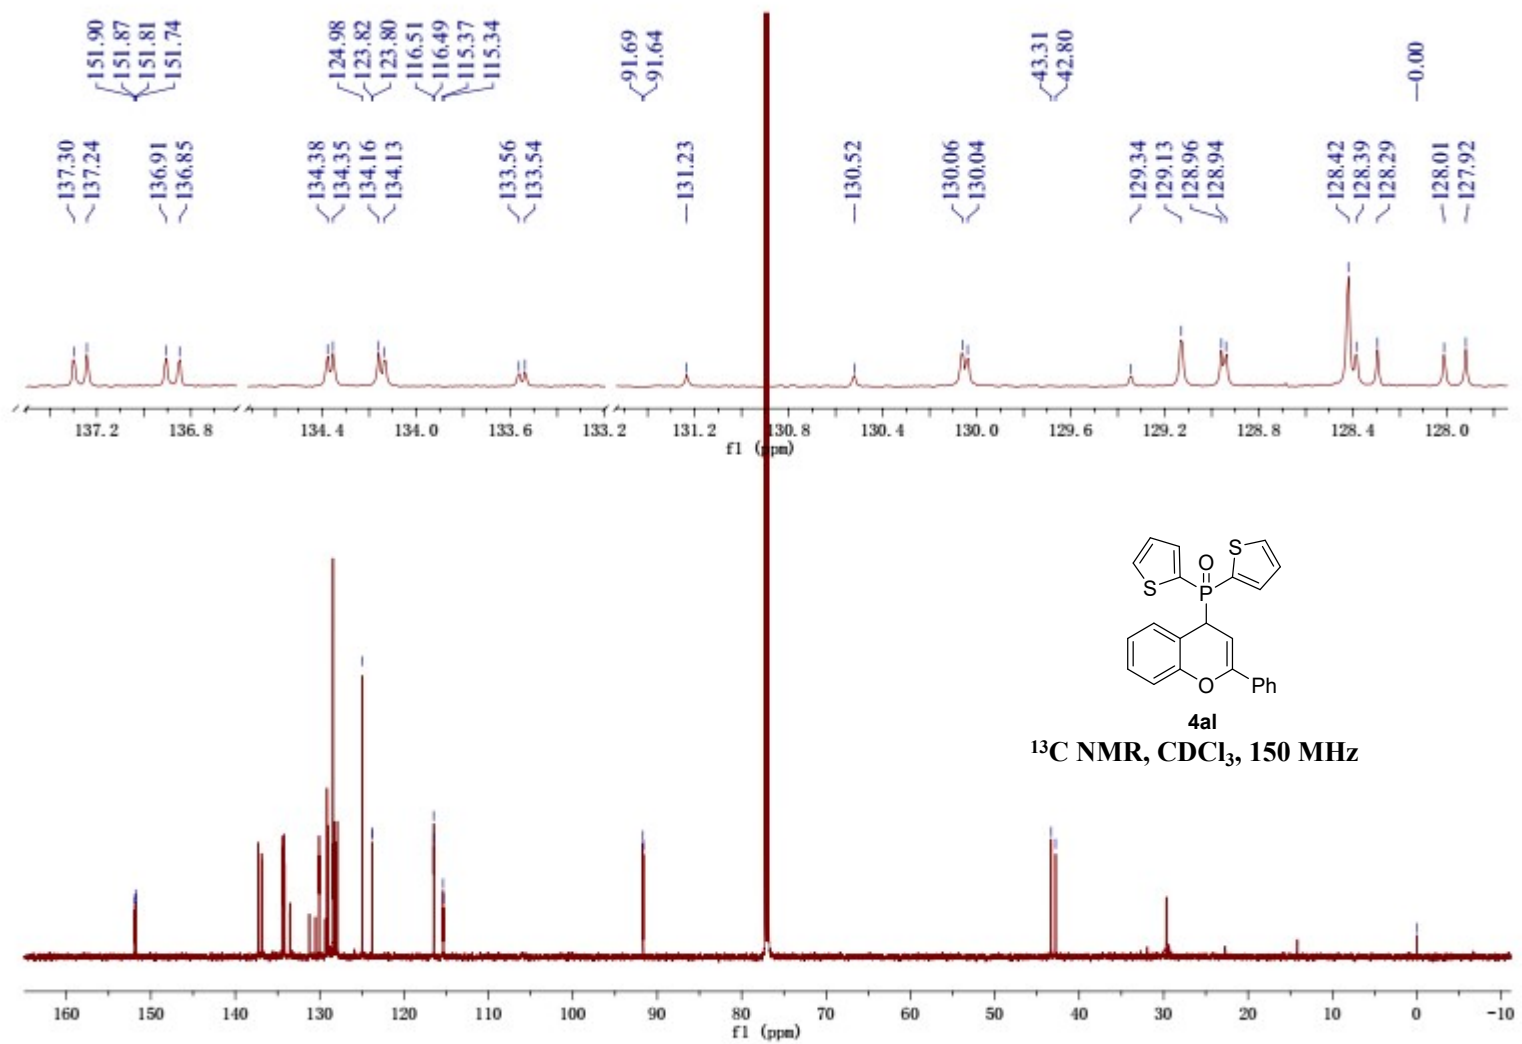



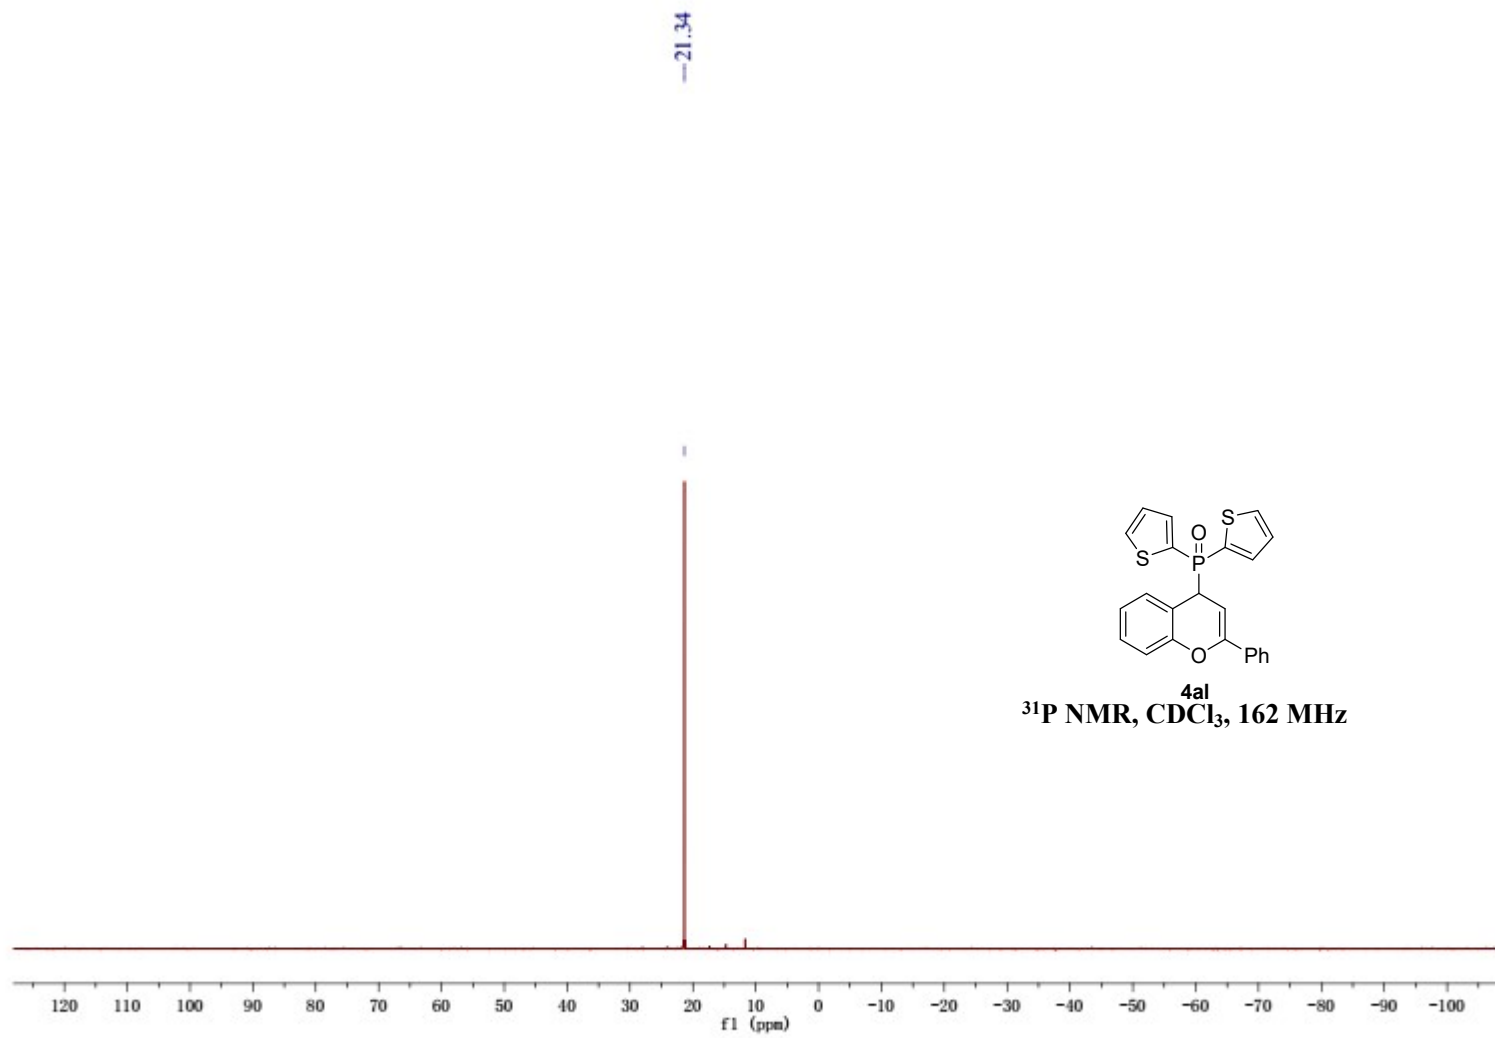

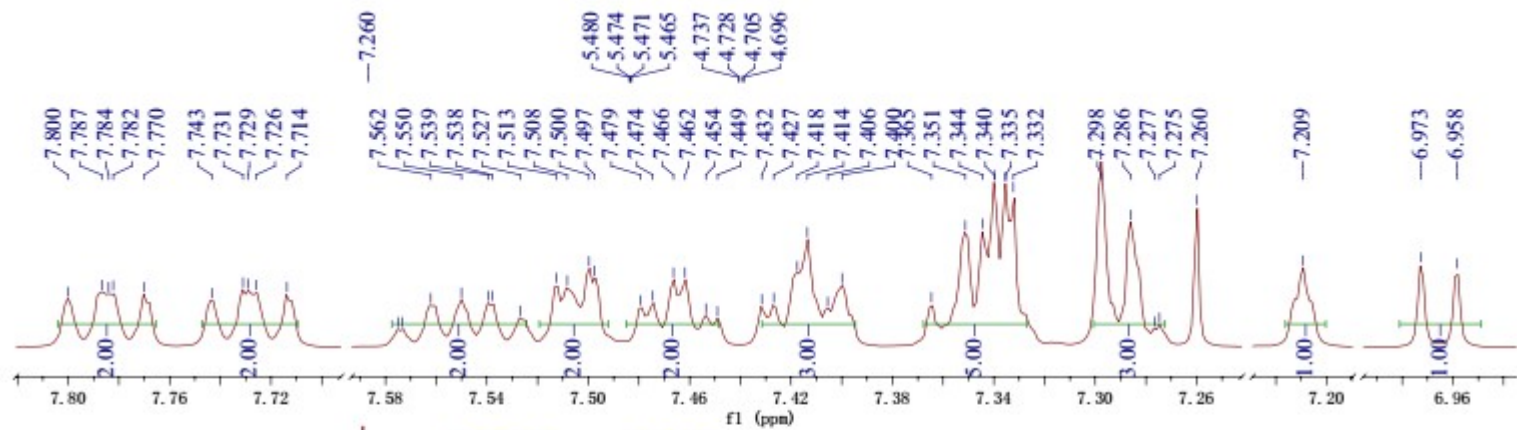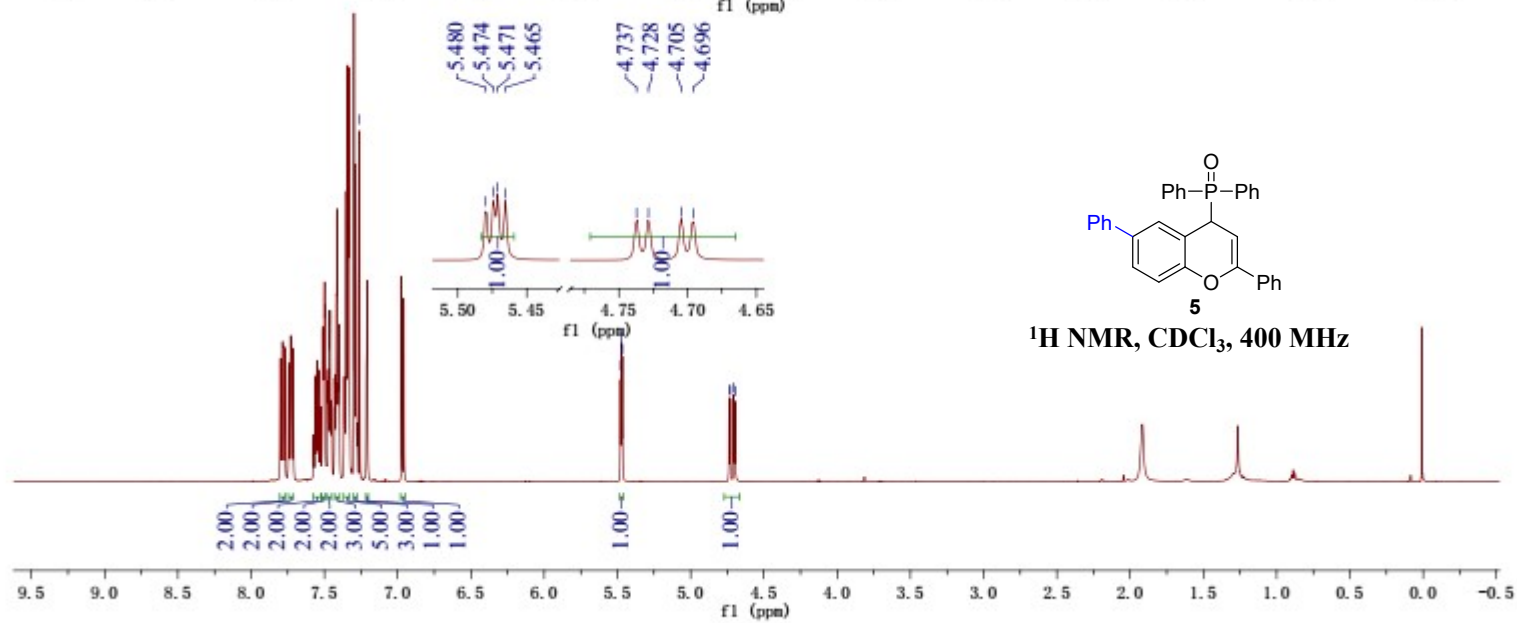

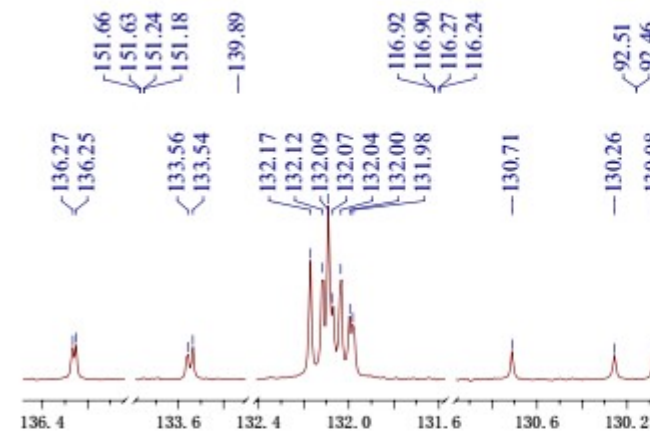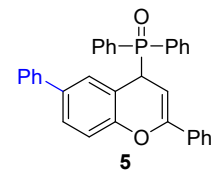

**5**  
<sup>13</sup>C NMR, CDCl<sub>3</sub>, 150 MHz

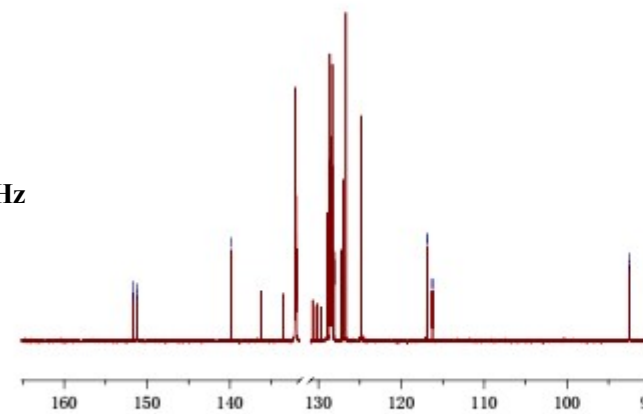

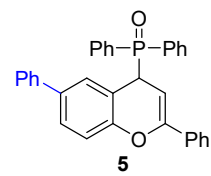

**5**  
**<sup>31</sup>P NMR, CDCl<sub>3</sub>, 243 MHz**

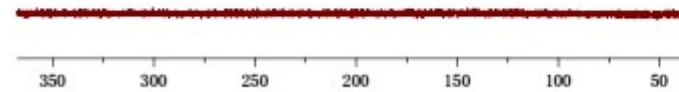

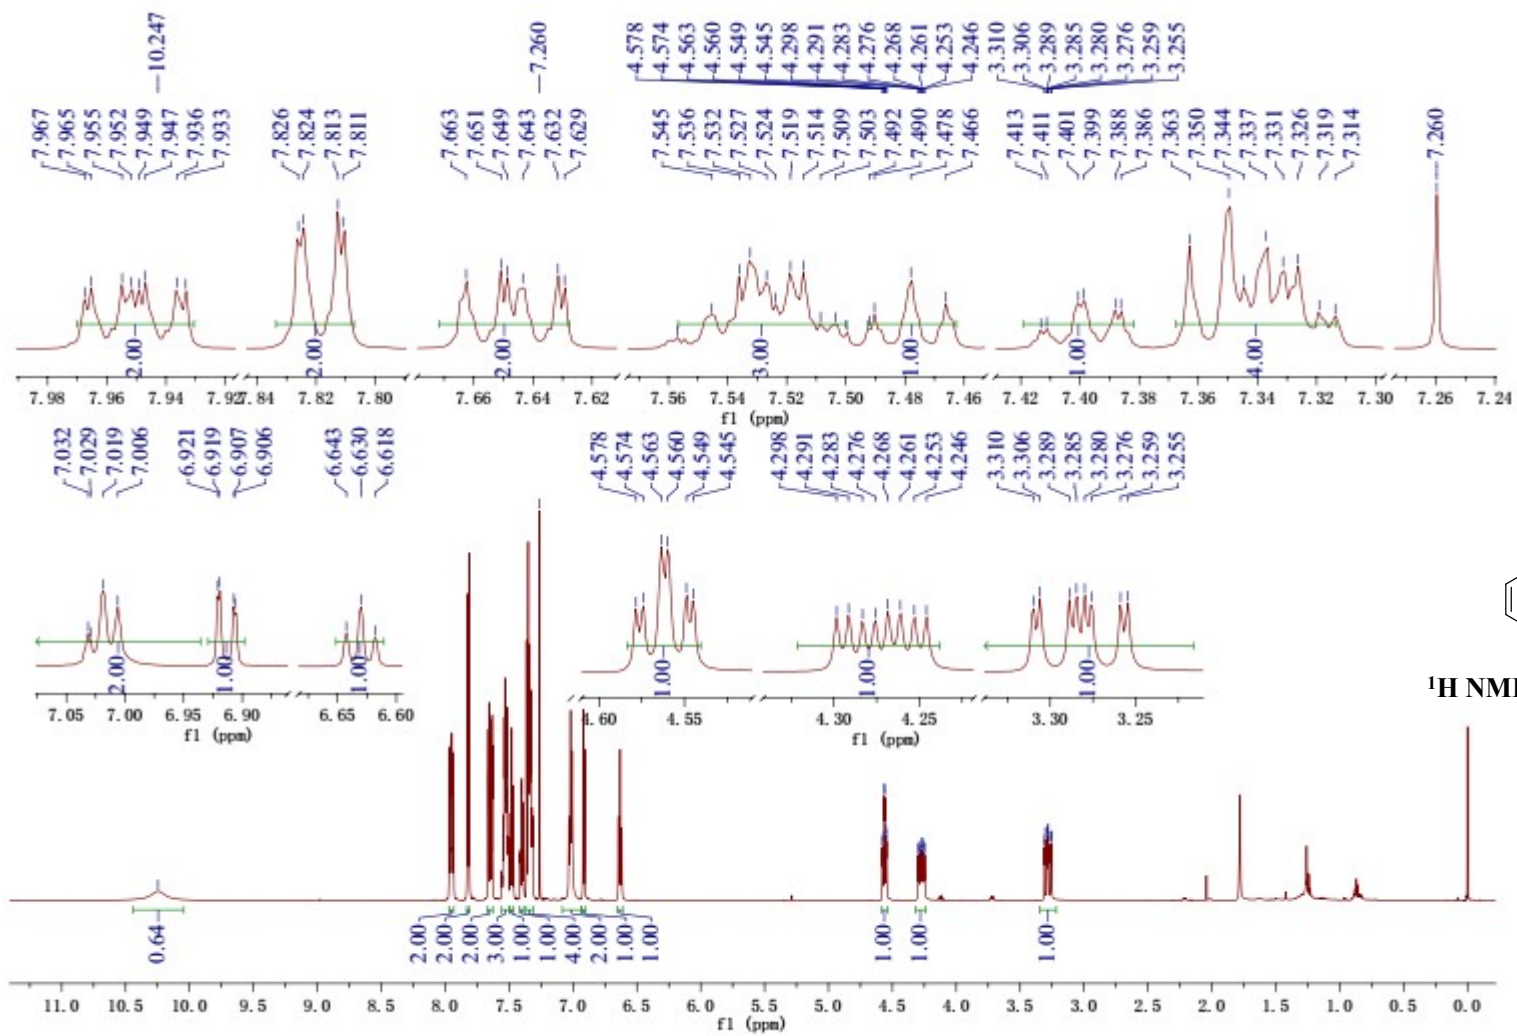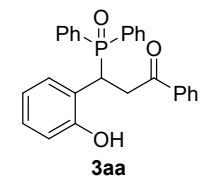

$^1\text{H}$  NMR,  $\text{CDCl}_3$ , 600 MHz

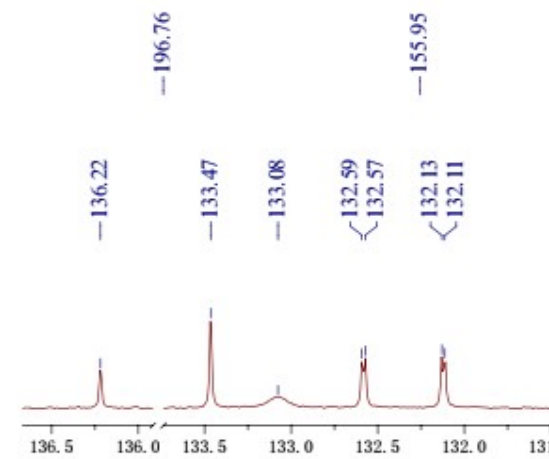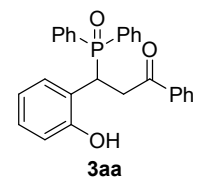

<sup>13</sup>C NMR, CDCl<sub>3</sub>, 150 MHz

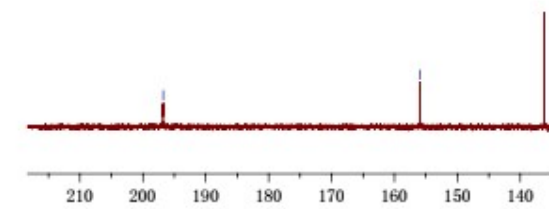

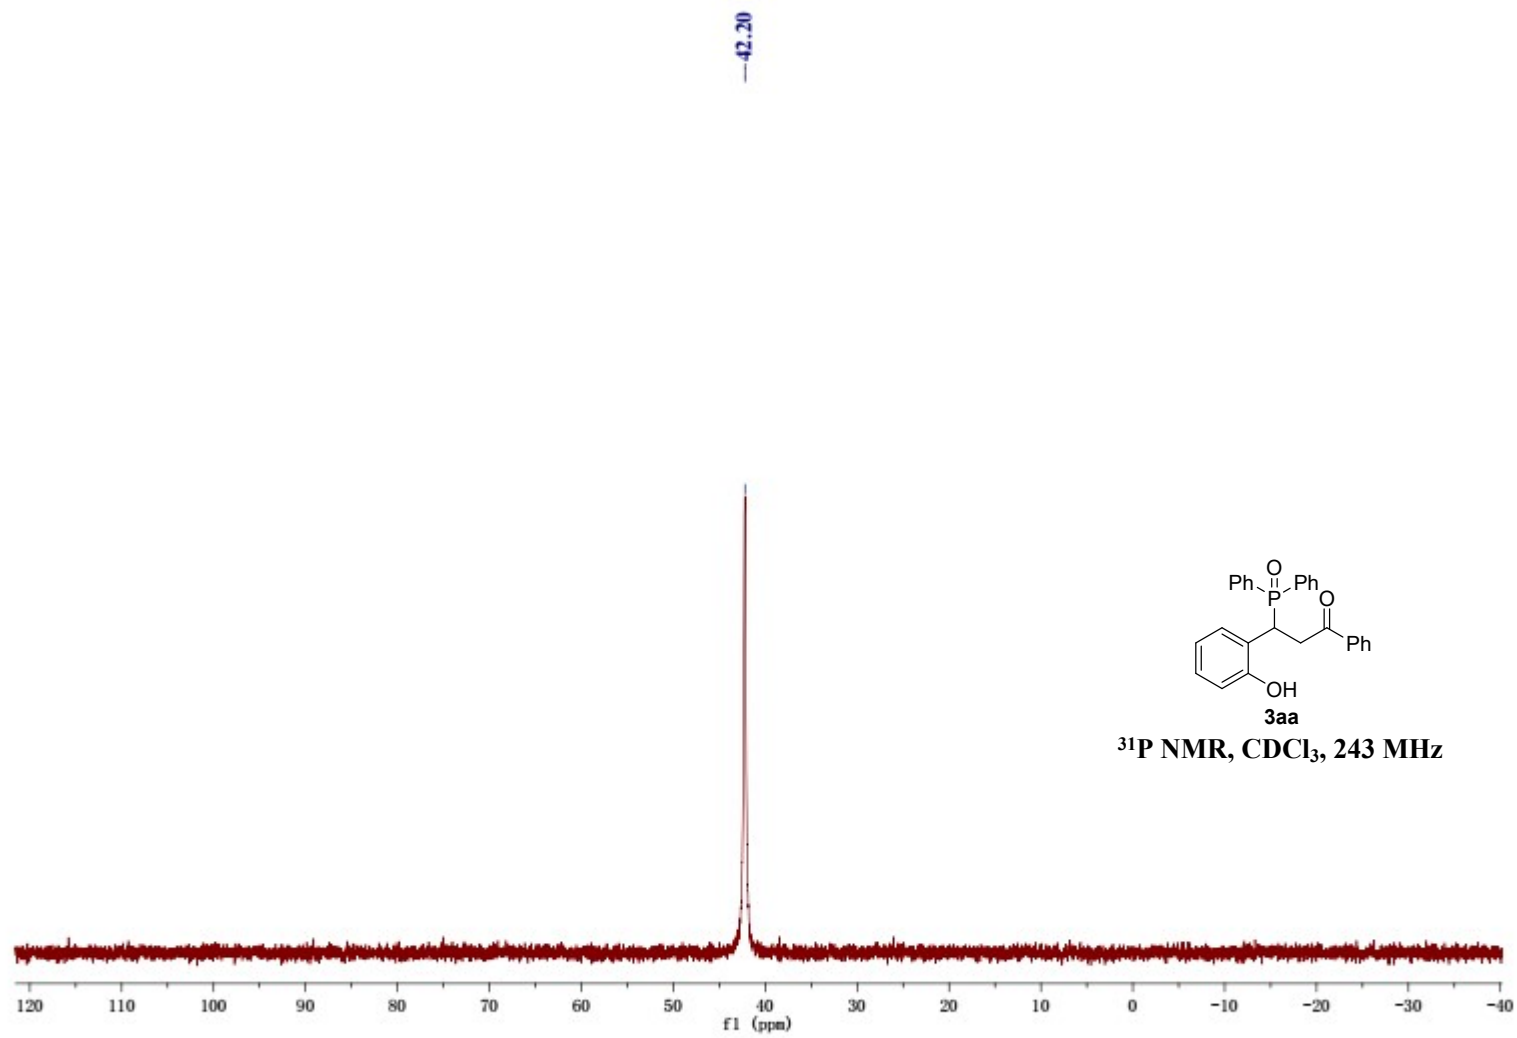

Supplement: d3ob01562a1.pdf [file d3ob01562a1.pdf]
